# Supplementary material for: Emergence and Pathogenicity of Highly Virulent Cryptococcus gattii Genotypes in the Northwest United States
Source: PubMed Central journal article supplement (PMC2858702; doi:10.1371/journal.ppat.1000850), 2010-04-22
Supplement: ppat.1000850.s001.pdf [file ppat.1000850.s001.pdf]

| Name        | SXII $\alpha$ allele | SXII $\alpha$ allele | IGS allele | TEFI allele | GPD1 allele | LAC1 allele | CAPI0 allele | PLBI allele | MPDI allele | Strain origin                            |
|-------------|----------------------|----------------------|------------|-------------|-------------|-------------|--------------|-------------|-------------|------------------------------------------|
|             | 1,354 bp             | 2,529 bp             | 740 bp     | 700 bp      | 547 bp      | 554 bp      | 568 bp       | 600 bp      | 677 bp      |                                          |
| NT-10       | 3                    | -                    | 3          | 4           | 5           | 11          | 4            | 5           | 3           | Northern Territory, Australia clinical   |
| WM276       | 7                    | -                    | 3          | 4           | 5           | 5           | 4            | 5           | 3           | South Australia, Australia environmental |
| NIH312      | 16                   | -                    | 18         | 10          | 9           | 2           | 6            | 23          | 8           | clinical                                 |
| MMRL2651    | 12                   | -                    | 8          | 2           | 4           | 1           | 7            | 3           | 2           | Botswana clinical                        |
| ICB107      | 18                   | -                    | 4          | 7           | 1           | 24          | 1            | 1           | 5           | Brazil clinical                          |
| R265        | 18                   | -                    | 4          | 7           | 1           | 4           | 1            | 1           | 5           | Vancouver Island clinical                |
| R268        | 18                   | -                    | 4          | 7           | 1           | 4           | 1            | 1           | 5           | Vancouver Island clinical                |
| CBS7750     | 18                   | -                    | 4          | 7           | 1           | 4           | 1            | 1           | 5           | San Francisco, USA environmental         |
| F3179       | 18                   | -                    | 4          | 7           | 1           | 4           | 1            | 1           | 5           | Vancouver Island, Canada clinical        |
| F2932       | 18                   | -                    | 4          | 7           | 1           | 4           | 1            | 1           | 5           | Vancouver Island, Canada clinical        |
| R269        | 18                   | -                    | 4          | 7           | 1           | 4           | 1            | 1           | 5           | Vancouver Island clinical                |
| R271        | 18                   | -                    | 4          | 7           | 1           | 4           | 1            | 1           | 5           | Vancouver Island clinical                |
| I52         | 18                   | -                    | 4          | 7           | 1           | 4           | 1            | 1           | 5           | Vancouver Island environmental           |
| RB1         | 18                   | -                    | 4          | 7           | 1           | 4           | 1            | 1           | 5           | Vancouver Island environmental           |
| RB2         | 18                   | -                    | 4          | 7           | 1           | 4           | 1            | 1           | 5           | Vancouver Island environmental           |
| RB4         | 18                   | -                    | 4          | 7           | 1           | 4           | 1            | 1           | 5           | Vancouver Island environmental           |
| NIH444      | 18                   | -                    | 4          | 7           | 1           | 4           | 1            | 1           | 5           | Seattle, USA clinical                    |
| R376        | 18                   | -                    | 4          | 7           | 1           | 4           | 1            | 1           | 5           | Vancouver Island, Canada clinical        |
| AOR432      | 18                   | -                    | 4          | 7           | 1           | 4           | 1            | 1           | 5           | Vancouver Island, Canada clinical        |
| R498        | 18                   | -                    | 4          | 7           | 1           | 4           | 1            | 1           | 5           | Vancouver Island, Canada veterinary      |
| R540        | 18                   | -                    | 4          | 7           | 1           | 4           | 1            | 1           | 5           | Vancouver Island, Canada clinical        |
| F2596       | 18                   | -                    | 4          | 7           | 1           | 4           | 1            | 1           | 5           | Vancouver Island, Canada veterinary      |
| F3016       | 18                   | -                    | 4          | 7           | 1           | 4           | 1            | 1           | 5           | Vancouver Island, Canada veterinary      |
| I25         | 18                   | -                    | 4          | 7           | 1           | 4           | 1            | 1           | 5           | Vancouver Island, Canada environmental   |
| I52A-3      | 18                   | -                    | 4          | 7           | 1           | 4           | 1            | 1           | 5           | Vancouver Island, Canada environmental   |
| RB39        | 18                   | -                    | 4          | 7           | 1           | 4           | 1            | 1           | 5           | Vancouver Island, Canada environmental   |
| RB45        | 18                   | -                    | 4          | 7           | 1           | 4           | 1            | 1           | 5           | Vancouver Island, Canada environmental   |
| RB59        | 18                   | -                    | 4          | 7           | 1           | 4           | 1            | 1           | 5           | Vancouver Island, Canada environmental   |
| T67707      | 18                   | -                    | 4          | 7           | 1           | 4           | 1            | 1           | 5           | San Juan Island, WA, clinical            |
| EJB3        | 18                   | -                    | 4          | 7           | 1           | 4           | 1            | 1           | 5           | OR State clinical                        |
| EJB19       | 18                   | -                    | 4          | 7           | 1           | 4           | 1            | 1           | 5           | OR State clinical                        |
| EJB4        | 18                   | -                    | 4          | 7           | 1           | 4           | 1            | 1           | 5           | WA State clinical                        |
| EJB5        | 18                   | -                    | 4          | 7           | 1           | 4           | 1            | 1           | 5           | WA State clinical                        |
| EJB6        | 18                   | -                    | 4          | 7           | 1           | 4           | 1            | 1           | 5           | WA State clinical                        |
| EJB7        | 18                   | -                    | 4          | 7           | 1           | 4           | 1            | 1           | 5           | WA State clinical                        |
| EJB8        | 18                   | -                    | 4          | 7           | 1           | 4           | 1            | 1           | 5           | WA State clinical                        |
| EJB9        | 18                   | -                    | 4          | 7           | 1           | 4           | 1            | 1           | 5           | WA State clinical                        |
| EJB13       | 18                   | -                    | 4          | 7           | 1           | 4           | 1            | 1           | 5           | WA State clinical                        |
| W15209      | 18                   | -                    | 4          | 7           | 1           | 4           | 1            | 1           | 5           | WA State clinical                        |
| EJB16       | 18                   | -                    | 4          | 7           | 1           | 4           | 1            | 1           | 5           | OR State alpaca                          |
| EJB17A      | 18                   | -                    | 4          | 7           | 1           | 4           | 1            | 1           | 5           | OR State canine                          |
| EJB17B      | 18                   | -                    | 4          | 7           | 1           | 4           | 1            | 1           | 5           | OR State canine                          |
| 3700 (1)    | 18                   | -                    | 4          | 7           | 1           | 4           | 1            | 1           | 5           | WA State porpoise                        |
| 3700 (2)    | 18                   | -                    | 4          | 7           | 1           | 4           | 1            | 1           | 5           | WA State porpoise                        |
| 3635        | 18                   | -                    | 4          | 7           | 1           | 4           | 1            | 1           | 5           | WA State porpoise                        |
| 3059        | 18                   | -                    | 4          | 7           | 1           | 4           | 1            | 1           | 5           | WA State porpoise                        |
| EJB21       | 18                   | -                    | 4          | 7           | 1           | 4           | 1            | 1           | 5           | OR State porpoise                        |
| MMC08-1042  | 18                   | -                    | 4          | 7           | 1           | 4           | 1            | 1           | 5           | OR State clinical                        |
| KB11632     | 18                   | -                    | 4          | 7           | 1           | 4           | 1            | 1           | 5           | OR State clinical                        |
| EJB22       | 18                   | -                    | 4          | 7           | 1           | 4           | 1            | 1           | 5           | OR State canine                          |
| EJB51       | 18                   | -                    | 4          | 7           | 1           | 4           | 1            | 1           | 5           | OR State alpaca                          |
| EJB54       | 18                   | -                    | 4          | 7           | 1           | 4           | 1            | 1           | 5           | OR State feline                          |
| EJB77       | 18                   | -                    | 4          | 7           | 1           | 4           | 1            | 1           | 5           | OR State canine                          |
| CA1014      | 18                   | -                    | 4          | 7           | 1           | 4           | 1            | 1           | 5           | CA clinical                              |
| EJB10       | 19                   | -                    | 10         | 5           | 6           | 4           | 1            | 2           | 5           | OR State clinical                        |
| MMC08-896   | 19                   | -                    | 10         | 5           | 6           | 4           | 1            | 2           | 5           | OR State canine                          |
| EJB53       | 19                   | -                    | 10         | 5           | 6           | 4           | 1            | 2           | 5           | OR state Elk                             |
| R272        | 19                   | -                    | 10         | 5           | 6           | 4           | 1            | 2           | 5           | Vancouver Island, Canada clinical        |
| Am1         | 19                   | -                    | 10         | 5           | 6           | 4           | 1            | 2           | 5           | Australia environmental                  |
| RB31        | 19                   | -                    | 10         | 5           | 6           | 4           | 1            | 2           | 5           | Vancouver Island, Canada environmental   |
| Ram2        | 19                   | -                    | 10         | 5           | 6           | 4           | 1            | 2           | 5           | Australia environmental                  |
| Ram5        | 19                   | -                    | 10         | 5           | 6           | 4           | 1            | 2           | 5           | Australia environmental                  |
| RDH-6       | 19                   | -                    | 10         | 5           | 6           | 4           | 1            | 2           | 5           | Northern Territory, Australia clinical   |
| V5/571_063  | 19                   | -                    | 10         | 5           | 6           | 4           | 1            | 2           | 5           | Sydney, Australia veterinary             |
| V26/571_147 | 19                   | -                    | 10         | 5           | 6           | 4           | 1            | 2           | 5           | Sydney, Australia veterinary             |
| V21/571_118 | 19                   | -                    | 10         | 5           | 6           | 4           | 1            | 2           | 5           | Sydney, Australia veterinary             |
| V9/571_073  | 19                   | -                    | 10         | 5           | 6           | 4           | 1            | 2           | 5           | Sydney, Australia veterinary             |
| V4/571_058  | 19                   | -                    | 10         | 5           | 6           | 4           | 1            | 2           | 5           | Sydney, Australia veterinary             |
| NT-6        | 19                   | -                    | 10         | 5           | 6           | 4           | 1            | 2           | 5           | Northern Territory, Australia clinical   |
| NT-13       | 19                   | -                    | 10         | 5           | 6           | 4           | 1            | 2           | 5           | Northern Territory, Australia clinical   |
| V20/571_116 | 19                   | -                    | 10         | 5           | 6           | 4           | 1            | 2           | 5           | Sydney, Australia veterinary             |
| NT-12       | 19                   | -                    | 10         | 5           | 6           | 4           | 1            | 2           | 5           | Northern Territory, Australia clinical   |
| Ram15       | 19                   | -                    | 10         | 5           | 6           | 4           | 1            | 2           | 5           | Australia environmental                  |
| NT-7        | 19                   | -                    | 10         | 5           | 6           | 4           | 1            | 2           | 5           | Northern Territory, Australia clinical   |
| EJB76       | 19                   | -                    | 10         | 5           | 6           | 4           | 1            | 2           | 5           | OR state feline                          |
| 99/473      | 19                   | -                    | 10         | 5           | 6           | 4           | 1            | 2           | 5           | Caribbean Islands clinical               |
| EJB12       | 35                   | -                    | 15         | 7           | 6           | 4           | 1            | 1           | 5           | OR State clinical                        |
| EJB18       | 35                   | -                    | 15         | 7           | 6           | 4           | 1            | 1           | 5           | OR State clinical                        |
| EJB14       | 35                   | -                    | 15         | 7           | 6           | 4           | 1            | 1           | 5           | OR State feline                          |
| EJB15       | 35                   | -                    | 15         | 7           | 6           | 4           | 1            | 1           | 5           | OR State alpaca                          |
| A6MR38      | 35                   | -                    | 15         | 7           | 6           | 4           | 1            | 1           | 5           | OR State clinical                        |
| EJB52       | 35                   | -                    | 15         | 7           | 6           | 4           | 1            | 1           | 5           | OR State feline                          |
| EJB55       | 35                   | -                    | 15         | 7           | 6           | 4           | 1            | 1           | 5           | OR State Ovine                           |
| EJB74       | 35                   | -                    | 15         | 7           | 6           | 4           | 1            | 1           | 5           | OR State feline                          |
| EJB75       | 35                   | -                    | 15         | 7           | 6           | 4           | 1            | 1           | 5           | OR State canine                          |
| LA499       | -                    | 5                    | 25         | 7           | 6           | 4           | 1            | 1           | 5           | Colombia clinical                        |
| LA584       | -                    | 5                    | 25         | 7           | 6           | 4           | 1            | 18          | 5           | Colombia clinical                        |
| CBS1930     | -                    | 5                    | 25         | 7           | 6           | 4           | 1            | 18          | 5           | Aruba veterinary                         |
| LA567       | -                    | 6                    | 34         | 7           | 6           | 4           | 1            | 18          | 5           | Colombia clinical                        |
| LA55        | -                    | 5                    | 31         | 7           | 27          | 4           | 1            | 1           | 5           | Brazil clinical                          |
| CBS10090    | -                    | 5                    | 31         | 7           | 27          | 4           | 1            | 1           | 5           | Greece clinical                          |
| ICB183      | 23                   | -                    | 30         | 7           | 21          | 4           | 14           | 18          | 5           | Brazil environmental                     |
| WA 861      | 23                   | -                    | 15         | 7           | 16          | 4           | 10           | 9           | 5           | Western Australia, Australia veterinary  |

|            |    |   |    |    |    |    |    |    |   |                                        |
|------------|----|---|----|----|----|----|----|----|---|----------------------------------------|
| ICB184     | 23 | - | 15 | 19 | 6  | 4  | 1  | 2  | 5 | Brazil environmental                   |
| 2004/335   | 23 | - | 22 | 7  | 6  | 4  | 1  | 2  | 5 | French Guyana clinical                 |
| 2004/606   | 23 | - | 22 | 7  | 6  | 4  | 1  | 2  | 5 | French Guyana clinical                 |
| 2004/681   | 23 | - | 22 | 7  | 6  | 4  | 1  | 2  | 5 | French Guyana clinical                 |
| 98/1132    | 23 | - | 22 | 7  | 6  | 4  | 1  | 2  | 5 | Caribbean Islands clinical             |
| 2006/00194 | 23 | - | 22 | 7  | 6  | 4  | 1  | 2  | 5 | <b>French Guyana clinical</b>          |
| ICB182     | 23 | - | 21 | 20 | 6  | 21 | 1  | 2  | 5 | Brazil clinical                        |
| BR189      | 23 | - | 21 | 20 | 6  | 21 | 1  | 2  | 5 | <b>Brazil environmental</b>            |
| 97/170     | 23 | - | 28 | 5  | 21 | 21 | 1  | 2  | 5 | French Guyana clinical                 |
| 93/980     | 23 | - | 27 | 5  | 22 | 21 | 1  | 19 | 5 | France clinical                        |
| CBS8684    | 27 | - | 26 | 5  | 6  | 21 | 1  | 22 | 5 | Uruguay environmental                  |
| 2003/125   | 19 | - | 26 | 7  | 25 | 21 | 1  | 9  | 5 | France clinical (Africa)               |
| 98/1037-2  | 28 | - | 26 | 7  | 25 | 21 | 1  | 9  | 5 | France clinical (N. Africa)            |
| 98/1037-1  | 28 | - | 26 | 7  | 25 | 21 | 1  | 9  | 5 | France clinical (N. Africa)            |
| ICB97      | 28 | - | 25 | 7  | 24 | 4  | 10 | 24 | 5 | Brazil clinical                        |
| ICB179     | 28 | - | 16 | 7  | 6  | 4  | 10 | 16 | 5 | Brazil environmental                   |
| ICB180     | 28 | - | 16 | 7  | 6  | 4  | 10 | 16 | 5 | Brazil environmental                   |
| 99/901-1   | 26 | - | 21 | 19 | 21 | 4  | 10 | 16 | 5 | France clinical (Ivory Coast)          |
| 99/901-2   | 26 | - | 21 | 19 | 21 | 4  | 10 | 16 | 5 | France clinical (Ivory Coast)          |
| 2000/87    | 26 | - | 21 | 19 | 21 | 4  | 10 | 16 | 5 | France clinical (Ivory Coast)          |
| 2001/935-1 | 26 | - | 21 | 19 | 21 | 4  | 10 | 16 | 5 | Senegal clinical                       |
| 96/1120-1  | 26 | - | 21 | 19 | 21 | 4  | 10 | 16 | 5 | France clinical (Central Africa)       |
| 96/1120-2  | 26 | - | 21 | 19 | 21 | 4  | 10 | 16 | 5 | France clinical (Central Africa)       |
| 2001/571   | 25 | - | 29 | 7  | 6  | 4  | 10 | 14 | 5 | France clinical (Central Africa)       |
| WMI78      | 22 | - | 16 | 5  | 17 | 16 | 1  | 14 | 5 | Sydney, Australia clinical             |
| RDH-2      | 24 | - | 6  | 6  | 2  | 7  | 5  | 1  | 5 | Northern Territory, Australia clinical |
| MMRL2647   | 24 | - | 6  | 6  | 2  | 7  | 5  | 1  | 5 | Sydney, Australia clinical             |
| NT-8       | 24 | - | 6  | 6  | 2  | 7  | 5  | 1  | 5 | Northern Territory, Australia clinical |
| RDH-9      | 24 | - | 6  | 6  | 2  | 7  | 5  | 1  | 5 | Northern Territory, Australia clinical |
| RDH-7      | 24 | - | 6  | 6  | 2  | 7  | 5  | 1  | 5 | Northern Territory, Australia clinical |
| NT-3       | 24 | - | 6  | 6  | 2  | 7  | 5  | 1  | 5 | Northern Territory, Australia clinical |
| MMRL1340   | 24 | - | 6  | 6  | 2  | 7  | 5  | 1  | 5 | Australia clinical                     |
