# Supplementary material for: Emergence and Pathogenicity of Highly Virulent Cryptococcus gattii Genotypes in the Northwest United States
Source: PubMed Central journal article supplement (PMC2858702; doi:10.1371/journal.ppat.1000850), 2010-04-22
Supplement: ppat.1000850.s002.pdf [file ppat.1000850.s002.pdf]

| Isolate | IGS | GPD1 | Strain Origin                          |
|---------|-----|------|----------------------------------------|
| VGIIa   | 4   | 1    | R265 VGIIa/major control               |
| VGIIb   | 10  | 6    | R272 VGII/minor control                |
| VGIIc   | 15  | 6    | EJB18 VGIIc/novel control              |
| 123     | 4   | 1    | Vancouver Island, Canada Environmental |
| 124     | 4   | 1    | Vancouver Island, Canada Environmental |
| 130     | 4   | 1    | Vancouver Island, Canada Environmental |
| 131     | 4   | 1    | Vancouver Island, Canada Environmental |
| 153     | 4   | 1    | Vancouver Island, Canada Environmental |
| 113A-5  | 4   | 1    | Vancouver Island, Canada Environmental |
| 129A-1  | 4   | 1    | Vancouver Island, Canada Environmental |
| 152-4   | 4   | 1    | Vancouver Island, Canada Environmental |
| 152-6   | 4   | 1    | Vancouver Island, Canada Environmental |
| 152A-1  | 4   | 1    | Vancouver Island, Canada Environmental |
| 152A-2  | 4   | 1    | Vancouver Island, Canada Environmental |
| 152A-4  | 4   | 1    | Vancouver Island, Canada Environmental |
| E113    | 4   | 1    | Vancouver Island, Canada Environmental |
| F1851   | 4   | 1    | Vancouver Island, Canada Environmental |
| F2310   | 4   | 1    | Vancouver Island, Canada Environmental |
| F3197   | 4   | 1    | Vancouver Island, Canada Environmental |
| MAC9    | 4   | 1    | Vancouver Island, Canada Environmental |
| 99MR10  | 4   | 1    | Vancouver Island, Canada Environmental |
| R273    | 4   | 1    | Vancouver Island, Canada Environmental |
| R322    | 4   | 1    | Vancouver Island, Canada Environmental |
| R369    | 4   | 1    | Vancouver Island, Canada Environmental |
| R406    | 4   | 1    | Vancouver Island, Canada Environmental |
| R409    | 4   | 1    | Vancouver Island, Canada Environmental |
| R507    | 4   | 1    | Vancouver Island, Canada Environmental |
| RB3     | 4   | 1    | Vancouver Island, Canada Environmental |
| RB5     | 4   | 1    | Vancouver Island, Canada Environmental |
| RB17    | 4   | 1    | Vancouver Island, Canada Environmental |
| RB50    | 4   | 1    | Vancouver Island, Canada Environmental |
| 152A-5  | 4   | 1    | Vancouver Island, Canada Environmental |
| RB7     | 4   | 1    | Vancouver Island, Canada Environmental |
| RB11    | 4   | 1    | Vancouver Island, Canada Environmental |
| RB13    | 4   | 1    | Vancouver Island, Canada Environmental |
| RB14    | 4   | 1    | Vancouver Island, Canada Environmental |
| RB15    | 4   | 1    | Vancouver Island, Canada Environmental |
| RB18    | 4   | 1    | Vancouver Island, Canada Environmental |
| RB20    | 4   | 1    | Vancouver Island, Canada Environmental |
| RB22    | 4   | 1    | Vancouver Island, Canada Environmental |
| RB26    | 4   | 1    | Vancouver Island, Canada Environmental |
| RB29    | 4   | 1    | Vancouver Island, Canada Environmental |
| RB30    | 4   | 1    | Vancouver Island, Canada Environmental |
| RB33    | 4   | 1    | Vancouver Island, Canada Environmental |
| RB34    | 4   | 1    | Vancouver Island, Canada Environmental |
| RB35    | 4   | 1    | Vancouver Island, Canada Environmental |
| RB37    | 4   | 1    | Vancouver Island, Canada Environmental |
| RB40    | 4   | 1    | Vancouver Island, Canada Environmental |

|        |    |   |                                        |
|--------|----|---|----------------------------------------|
| RB42   | 4  | 1 | Vancouver Island, Canada Environmental |
| RB46   | 4  | 1 | Vancouver Island, Canada Environmental |
| RB48   | 4  | 1 | Vancouver Island, Canada Environmental |
| RB54   | 4  | 1 | Vancouver Island, Canada Environmental |
| RB56   | 4  | 1 | Vancouver Island, Canada Environmental |
| RB58   | 4  | 1 | Vancouver Island, Canada Environmental |
| 129    | 10 | 6 | Vancouver Island, Canada Environmental |
| 133    | 10 | 6 | Vancouver Island, Canada Environmental |
| 152A-6 | 10 | 6 | Vancouver Island, Canada Environmental |
| RB52   | 10 | 6 | Vancouver Island, Canada Environmental |
| RB57   | 10 | 6 | Vancouver Island, Canada Environmental |
