# Supplementary material for: Emergence and Pathogenicity of Highly Virulent Cryptococcus gattii Genotypes in the Northwest United States
Source: PubMed Central journal article supplement (PMC2858702; doi:10.1371/journal.ppat.1000850), 2010-04-22

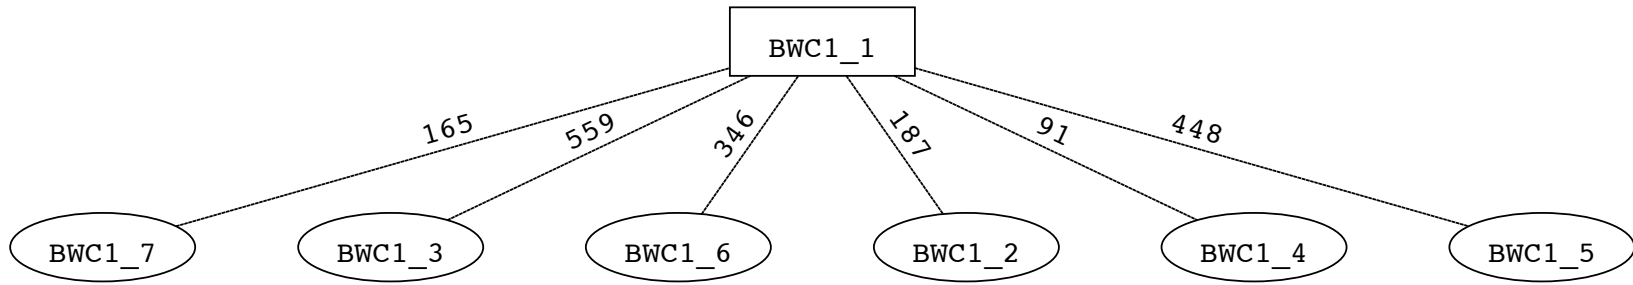

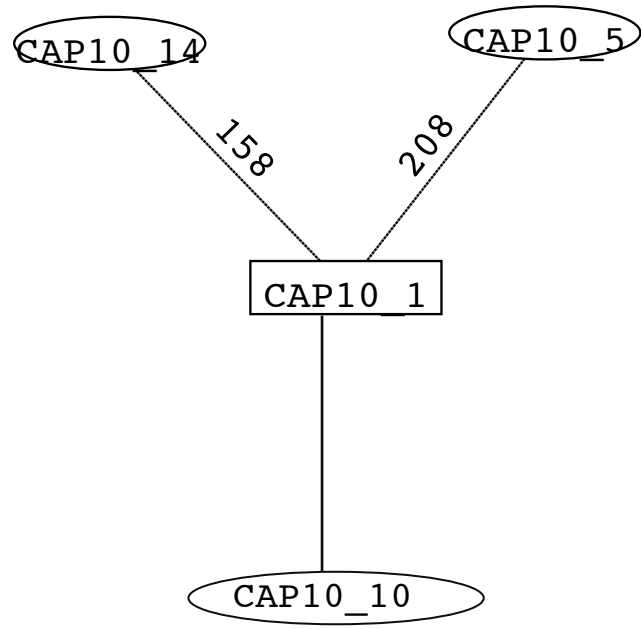

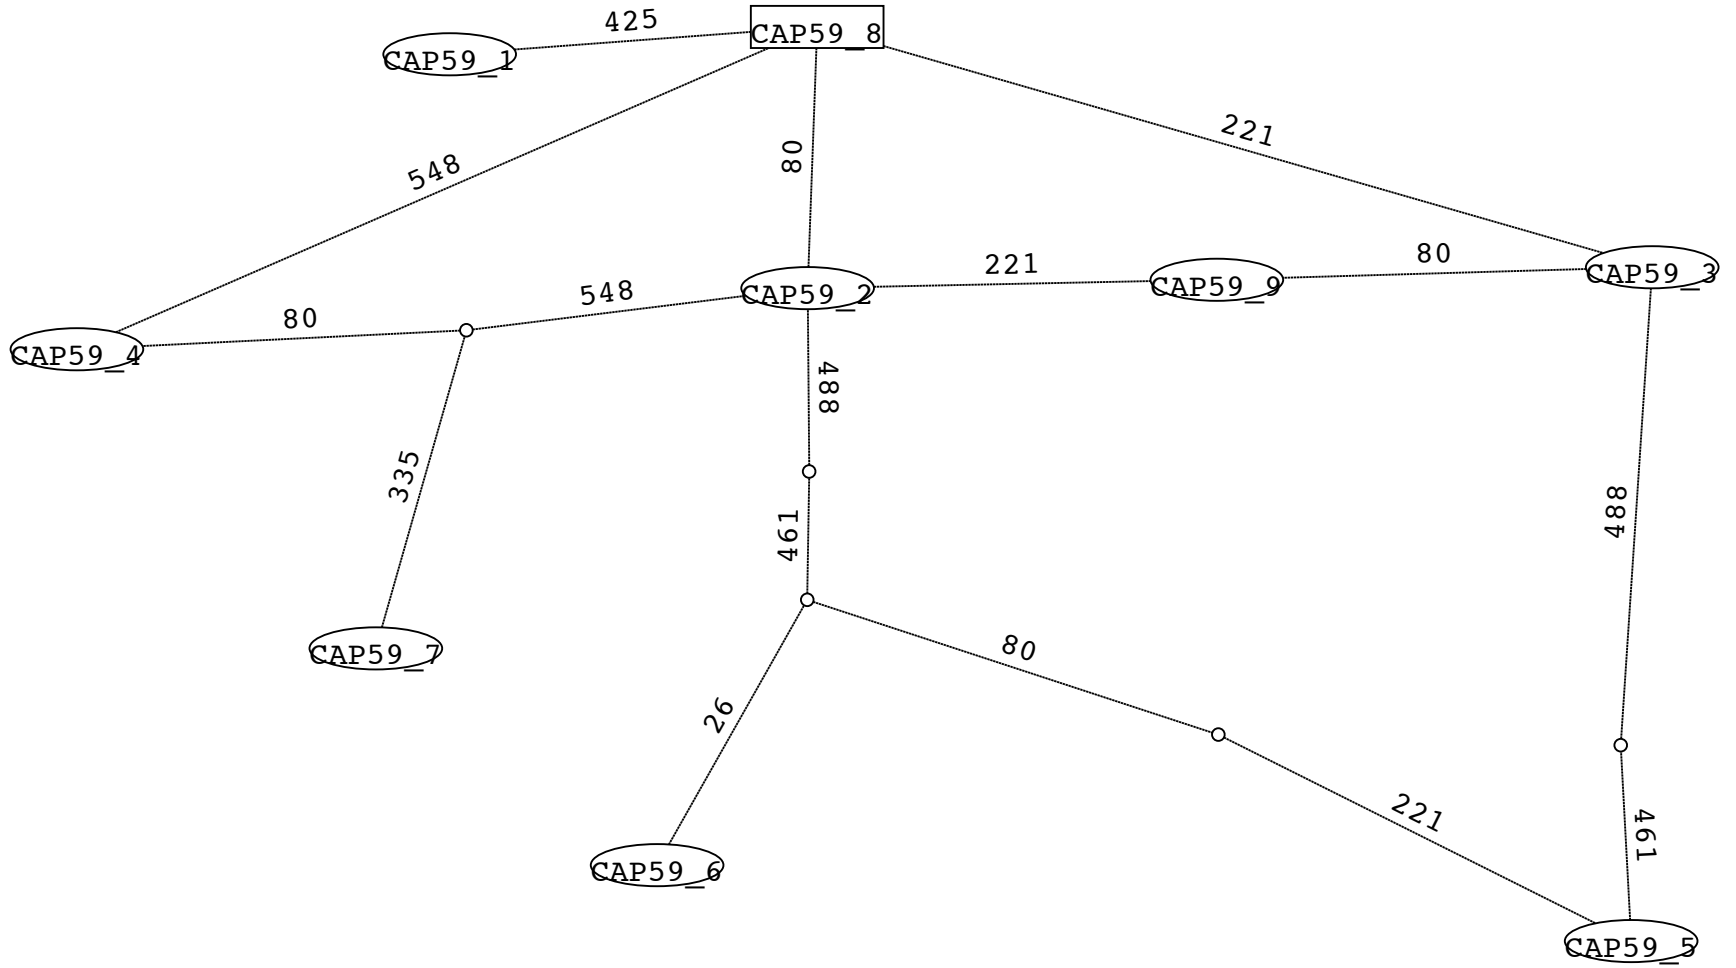

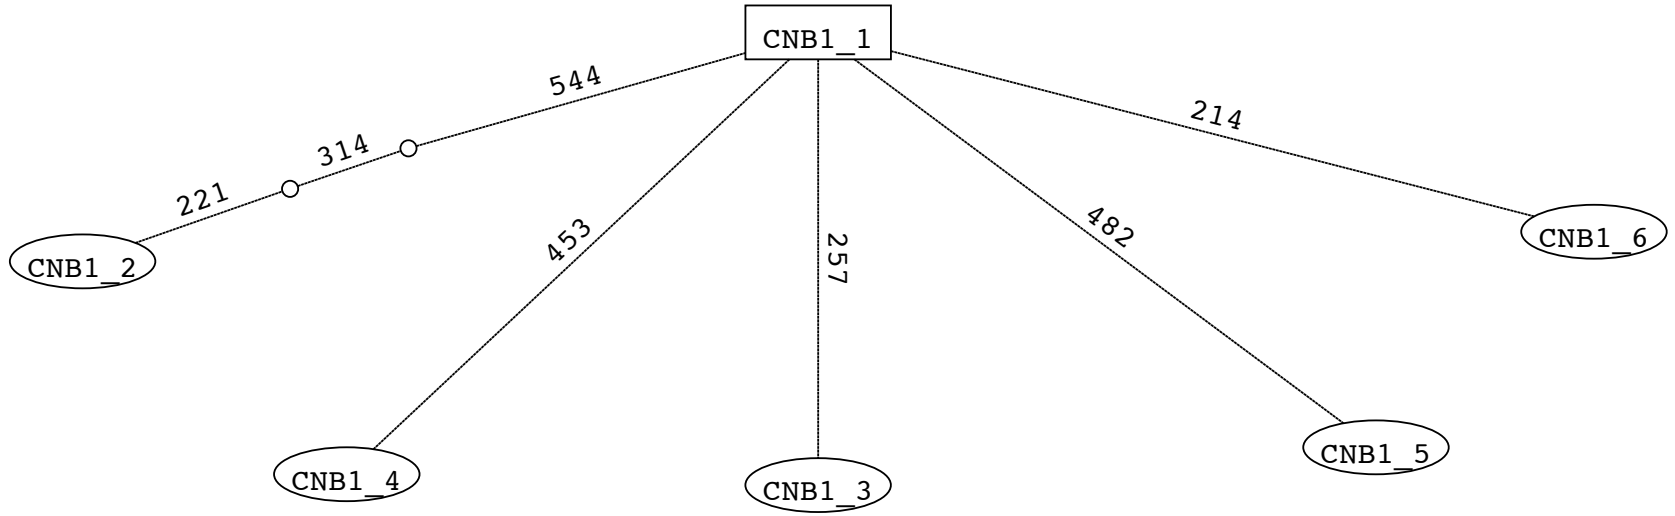

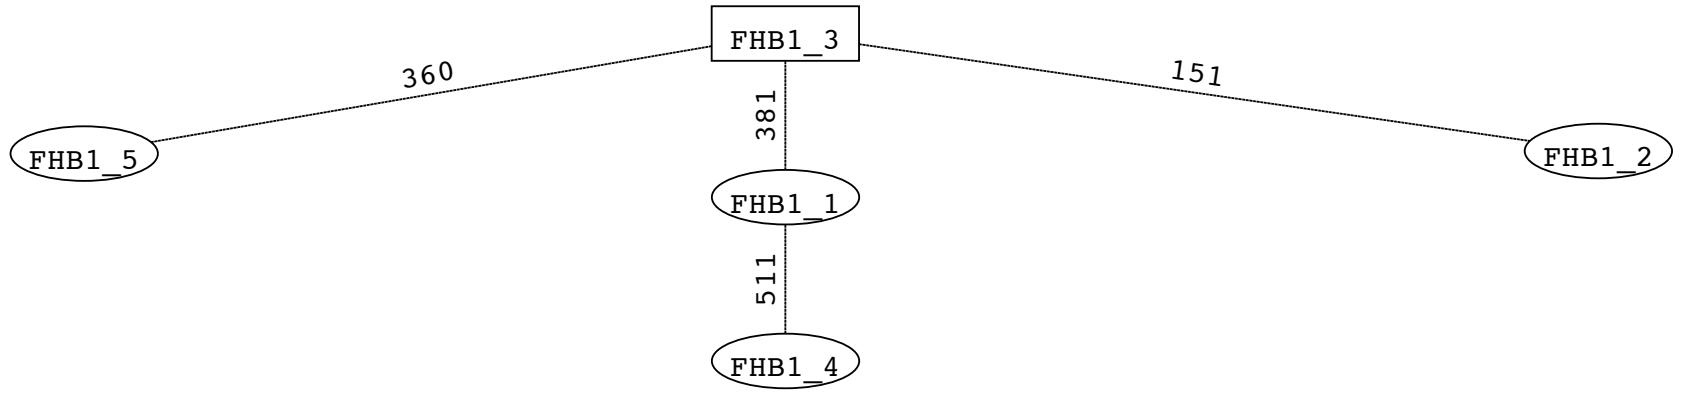

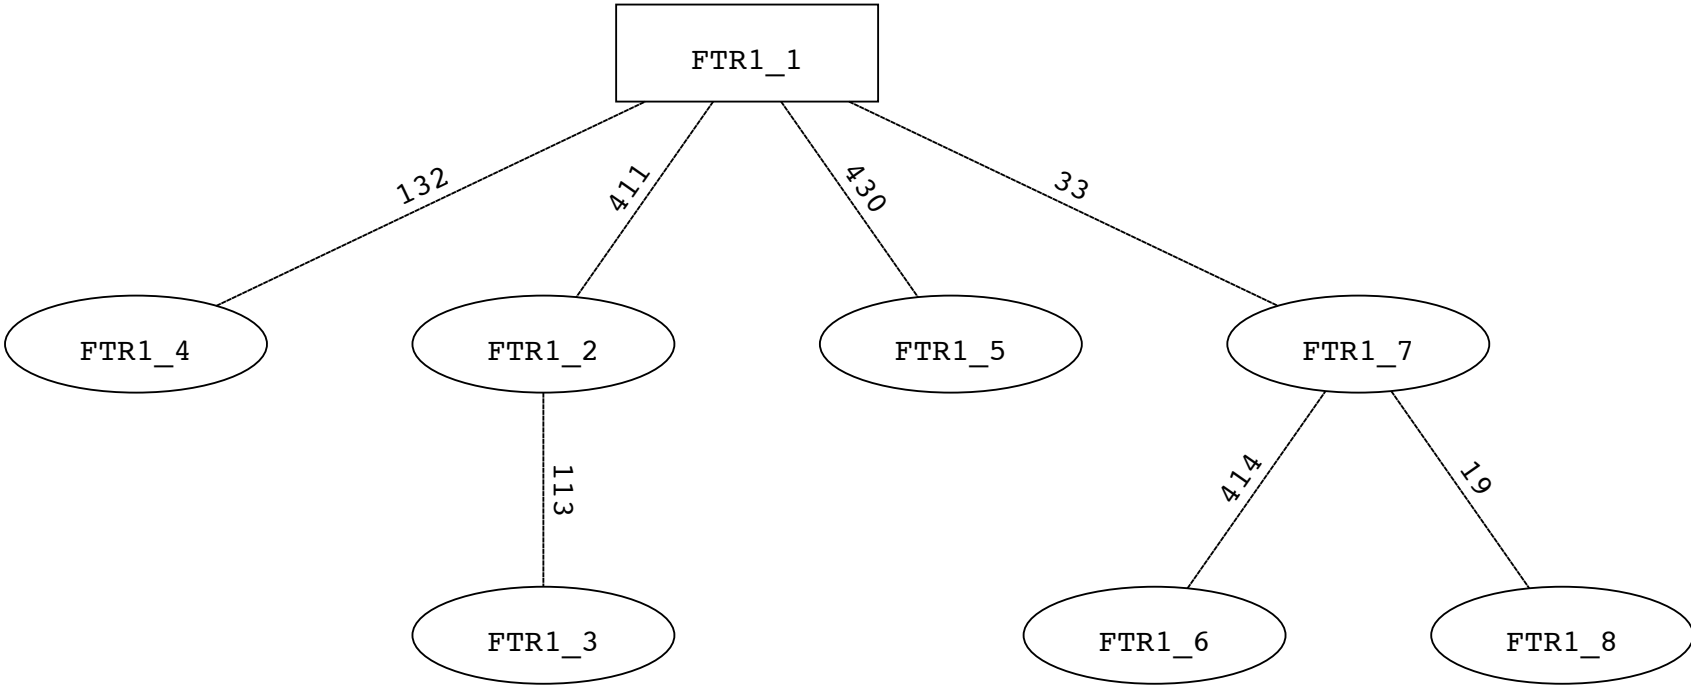

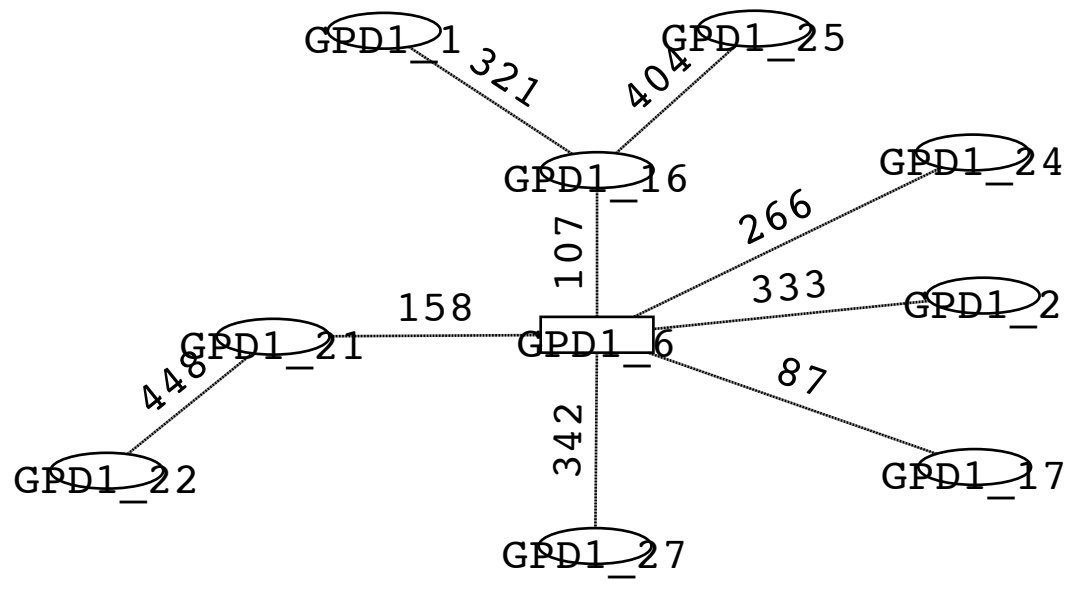

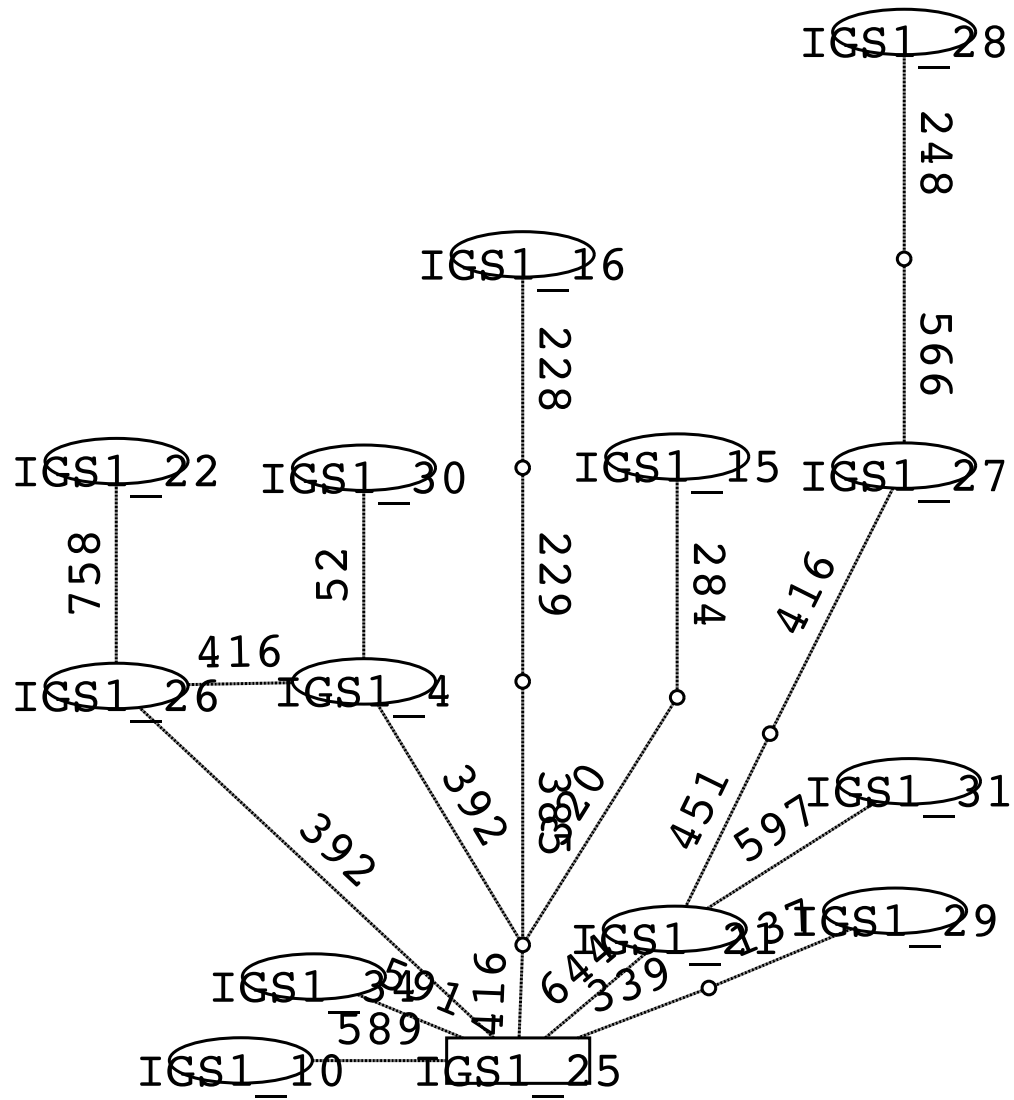



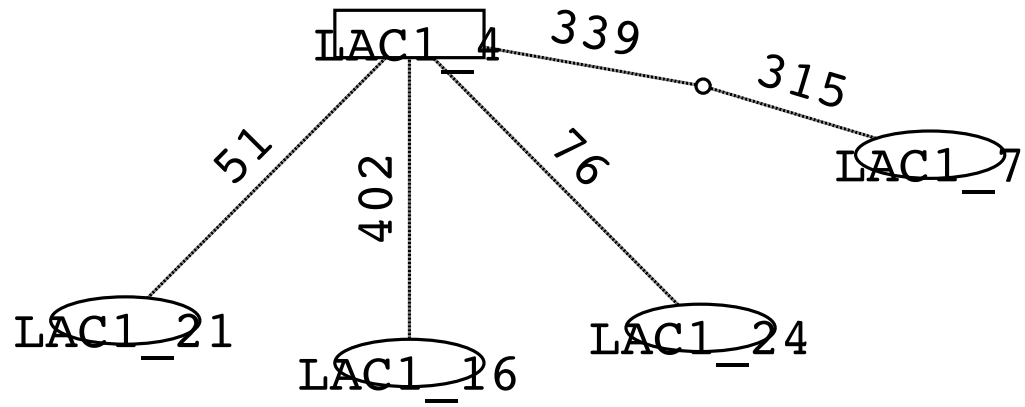

MPD1\_5

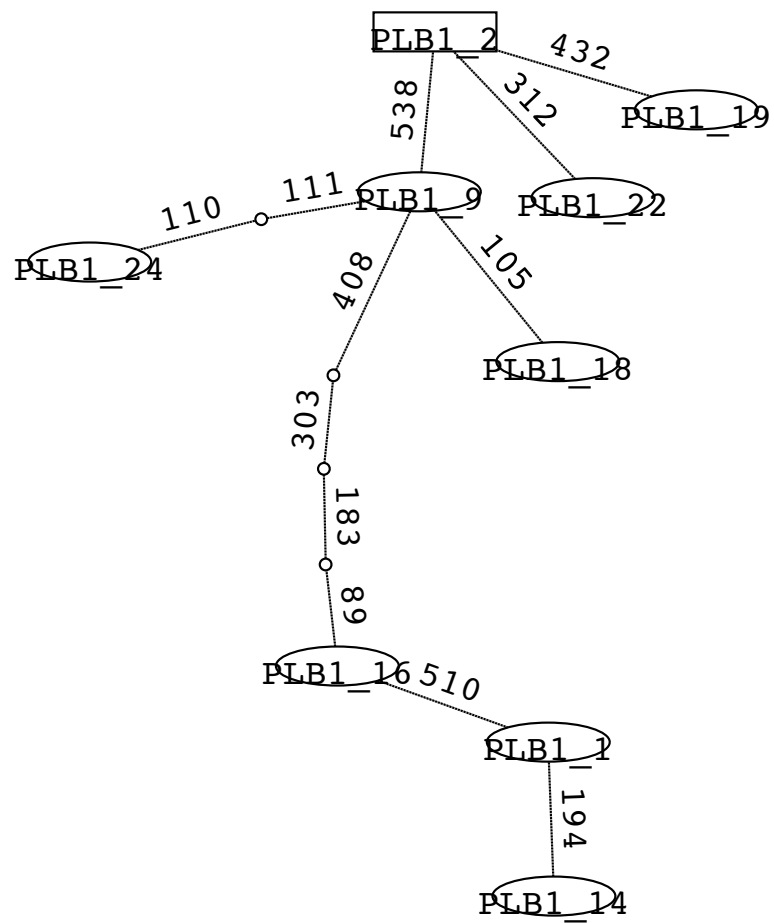

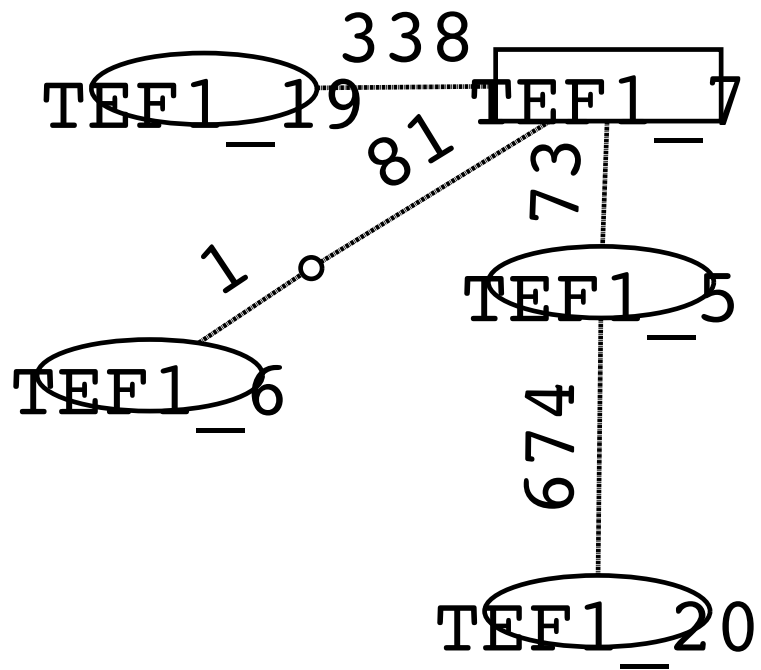

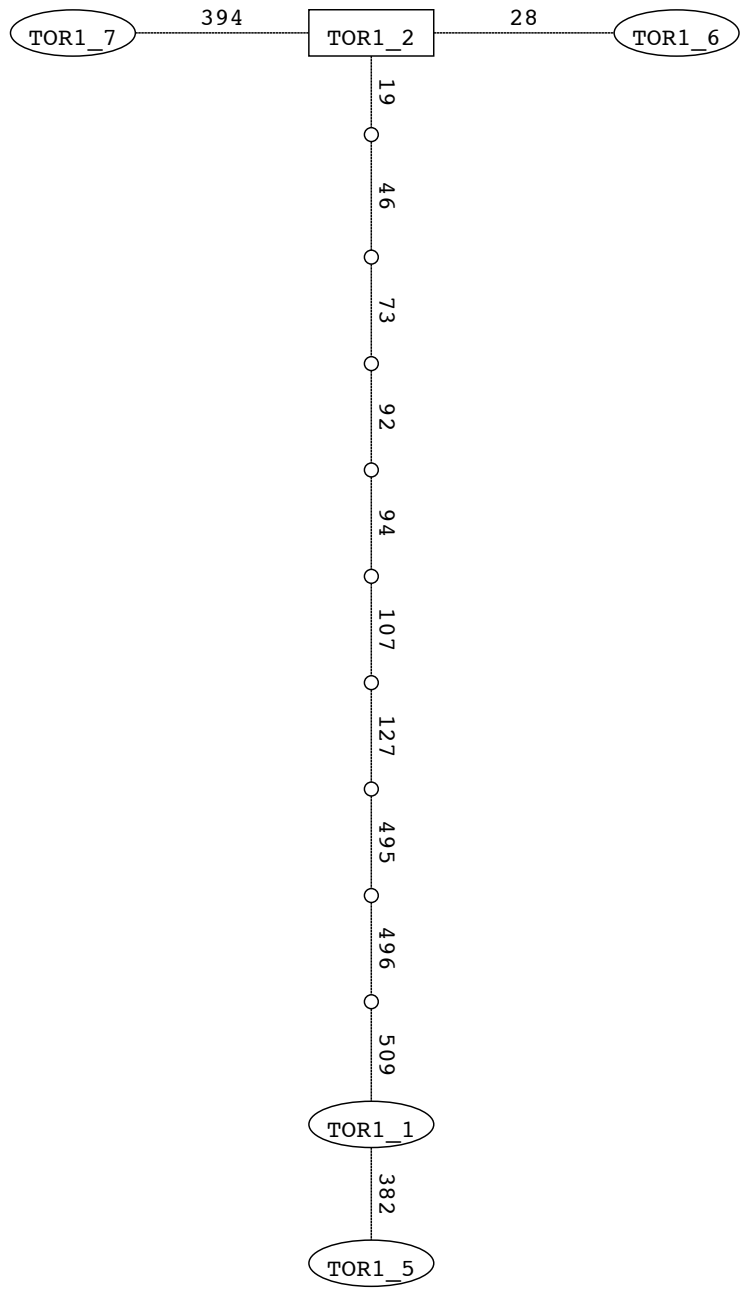

Supplement: ppat.1000850.s003.pdf [file ppat.1000850.s003.pdf]
