# Supplementary material for: Emergence and Pathogenicity of Highly Virulent Cryptococcus gattii Genotypes in the Northwest United States
Source: PubMed Central journal article supplement (PMC2858702; doi:10.1371/journal.ppat.1000850), 2010-04-22
Supplement: ppat.1000850.s004.pdf [file ppat.1000850.s004.pdf]

*SXI v. TEF1*

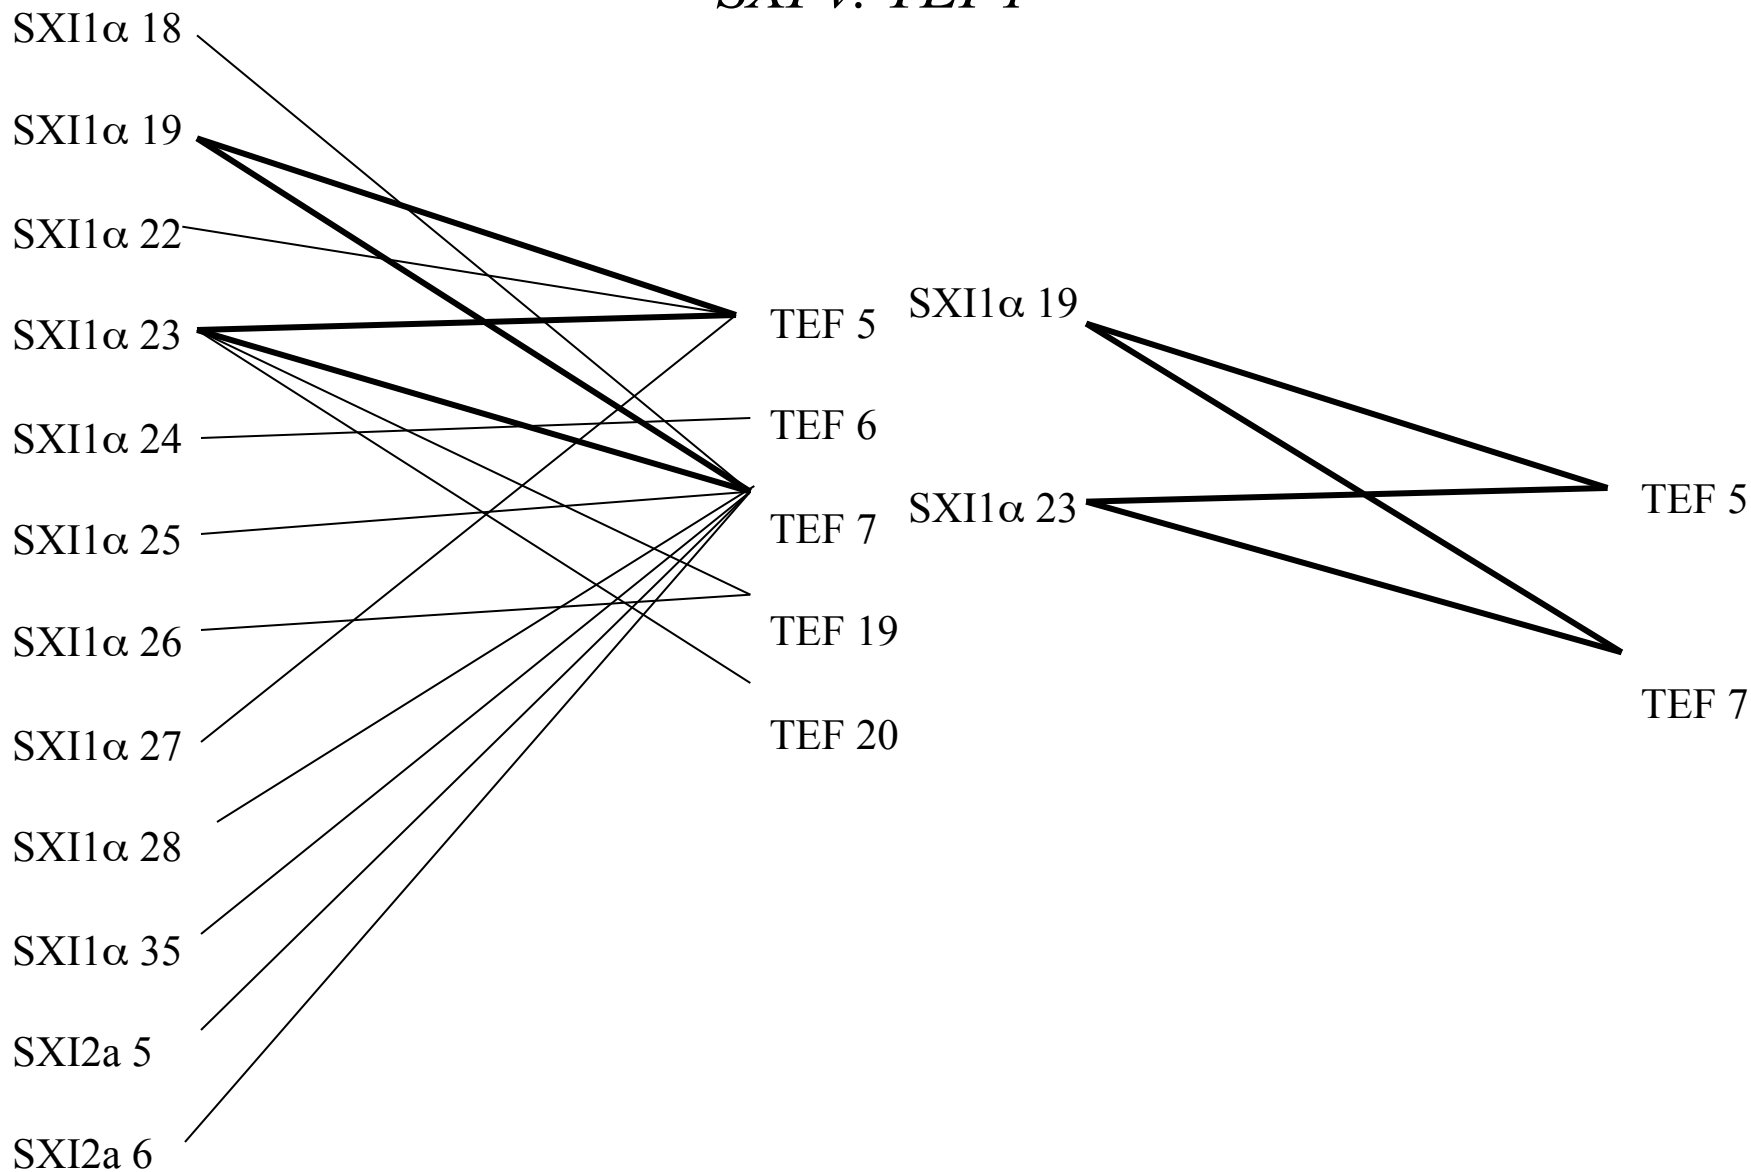

# *SXI v. GPD1*

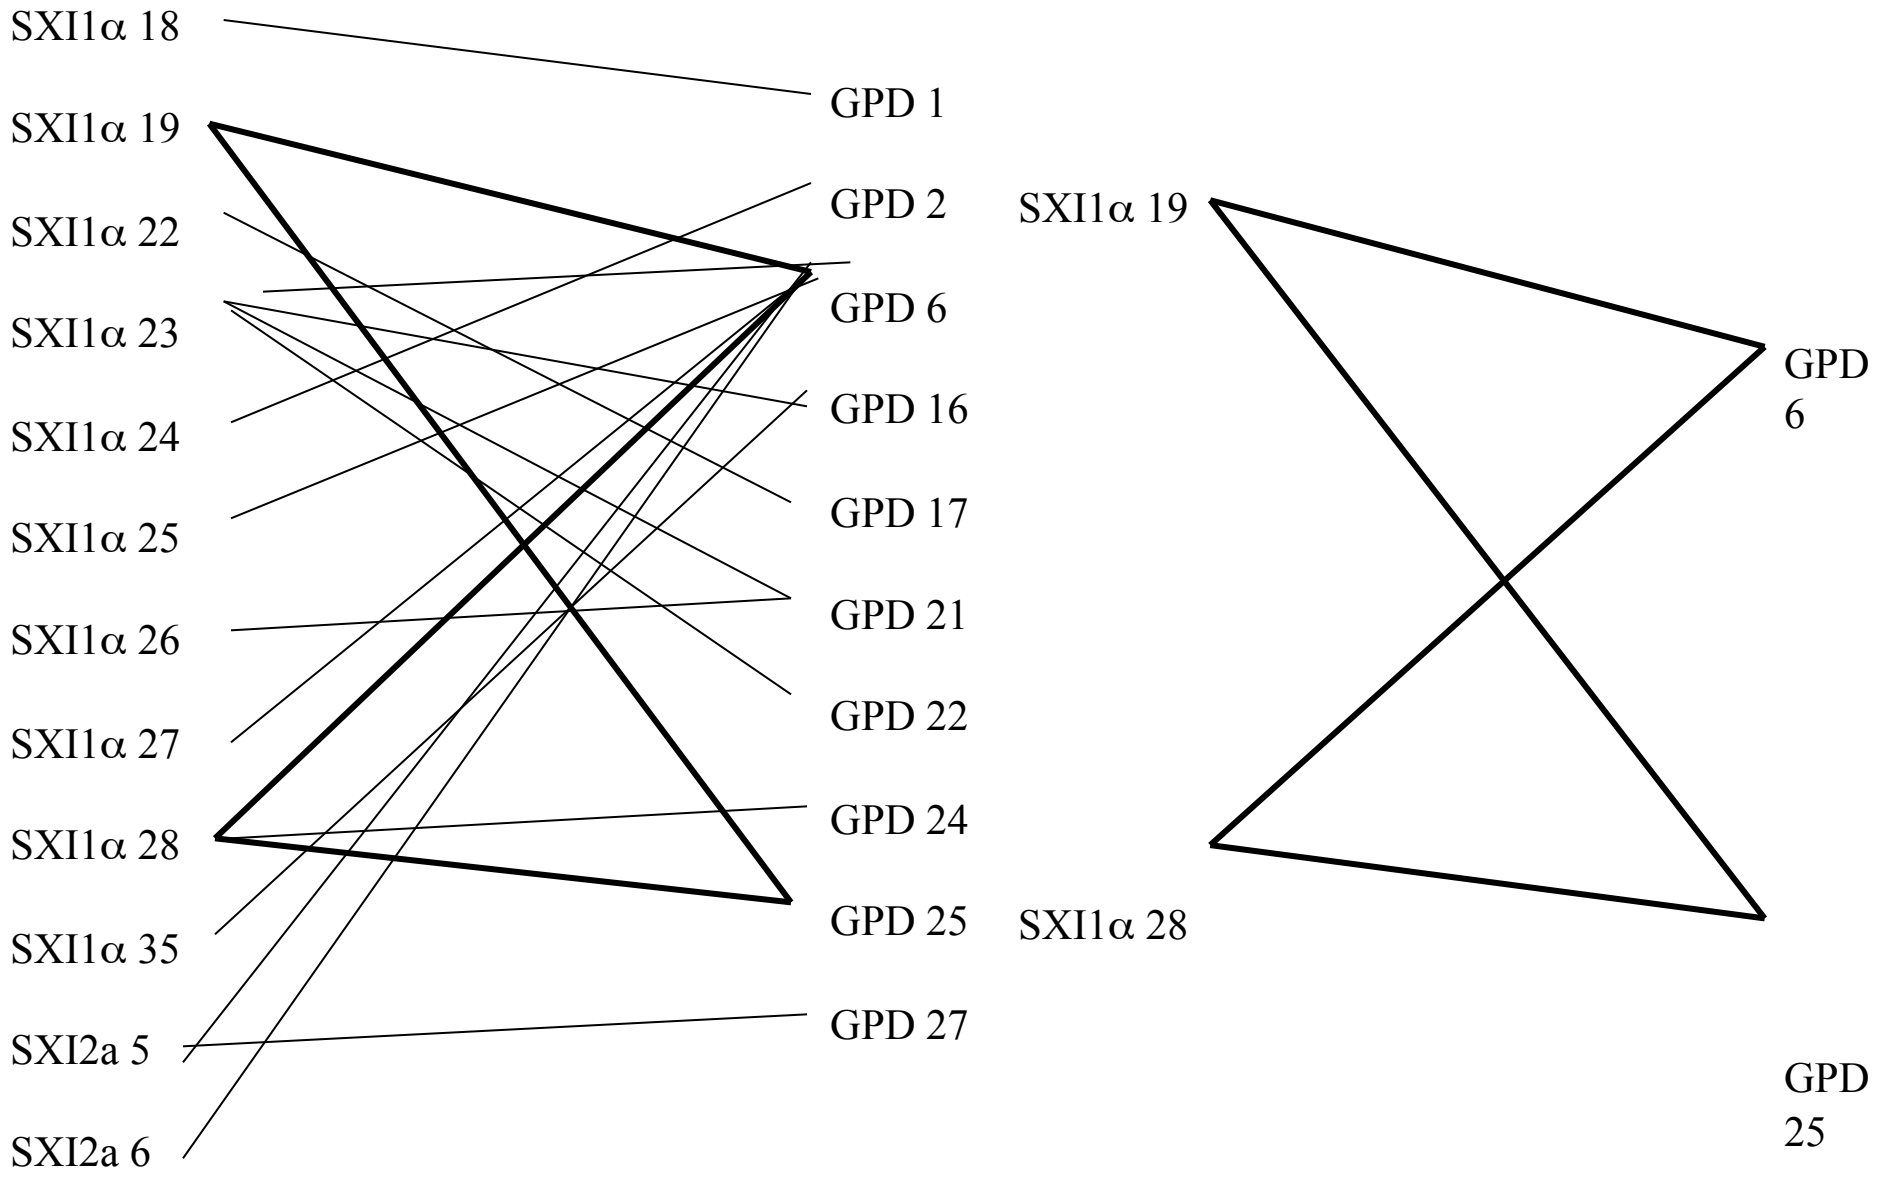

*SXI v. LAC1*

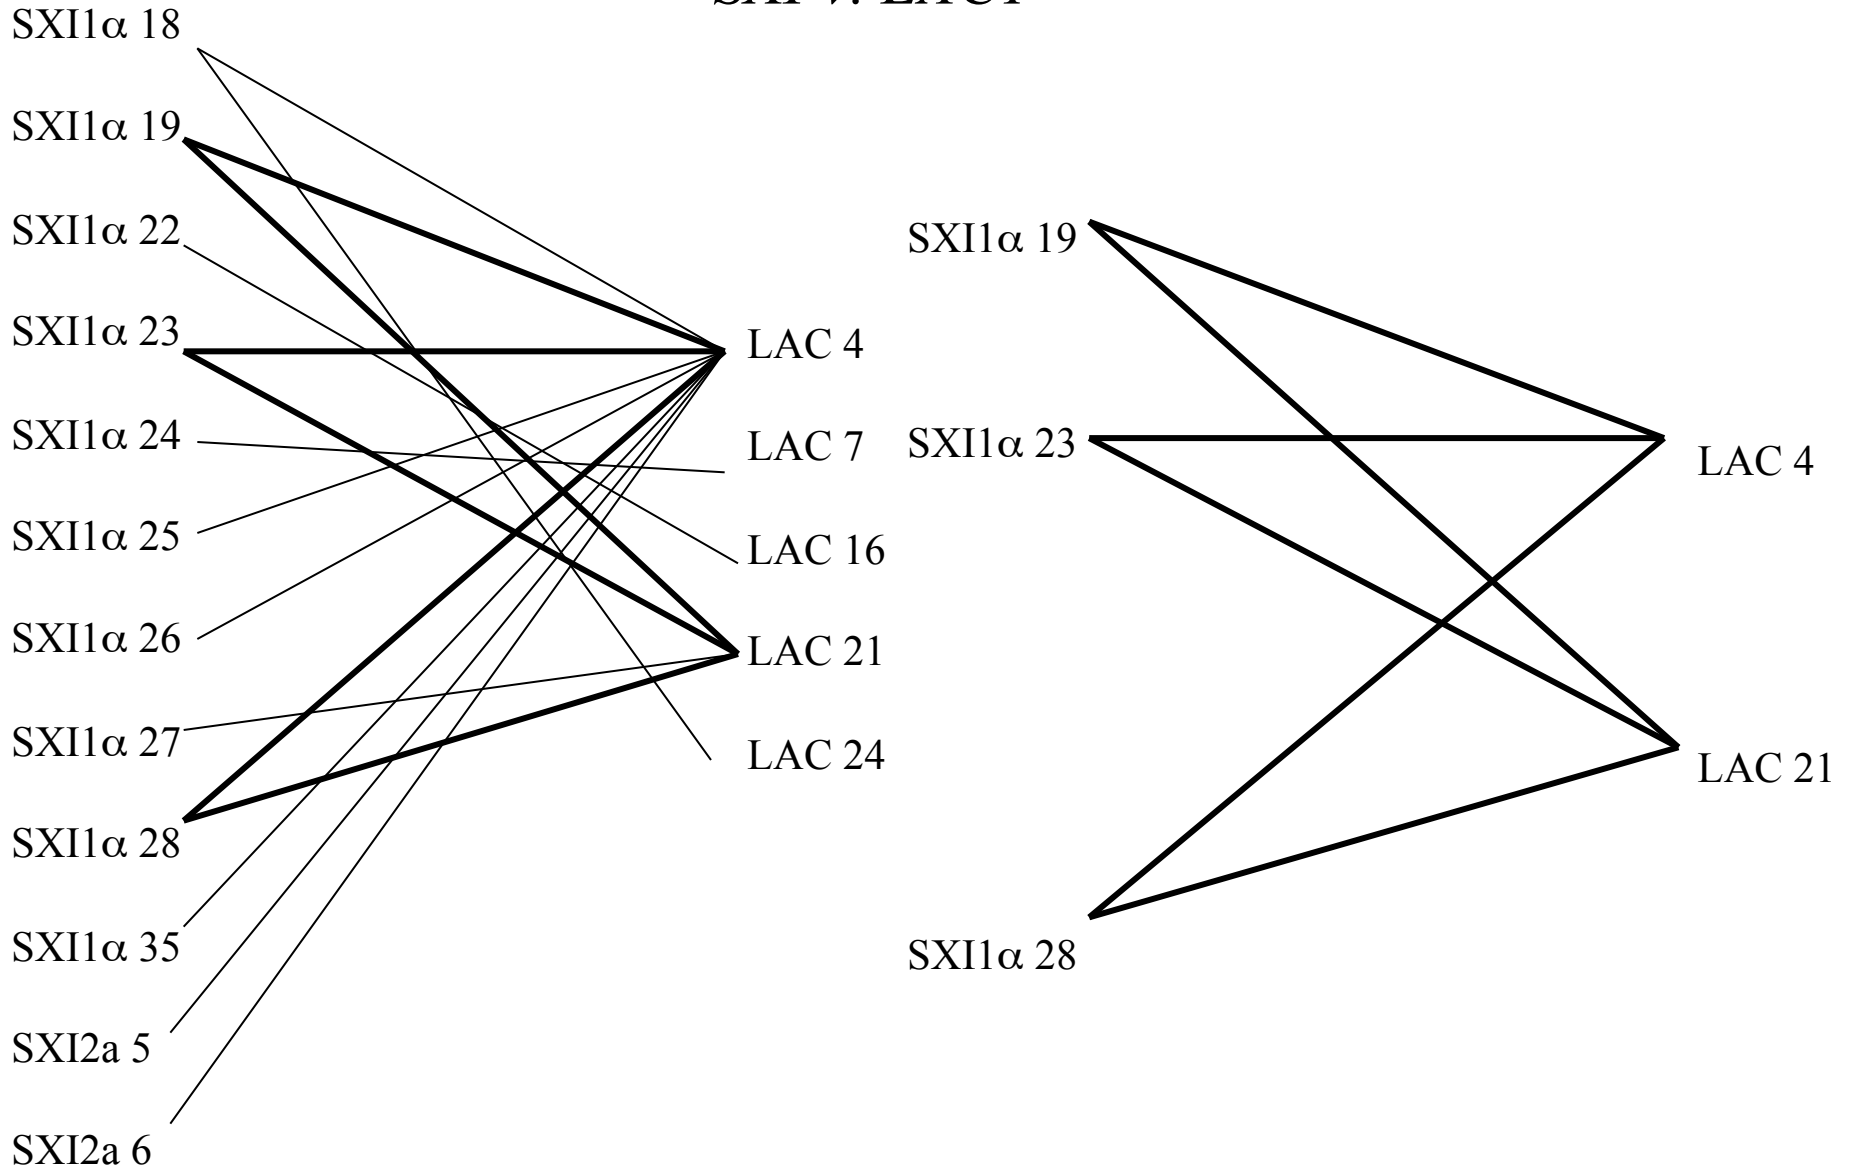

*SXI v. CAP10*

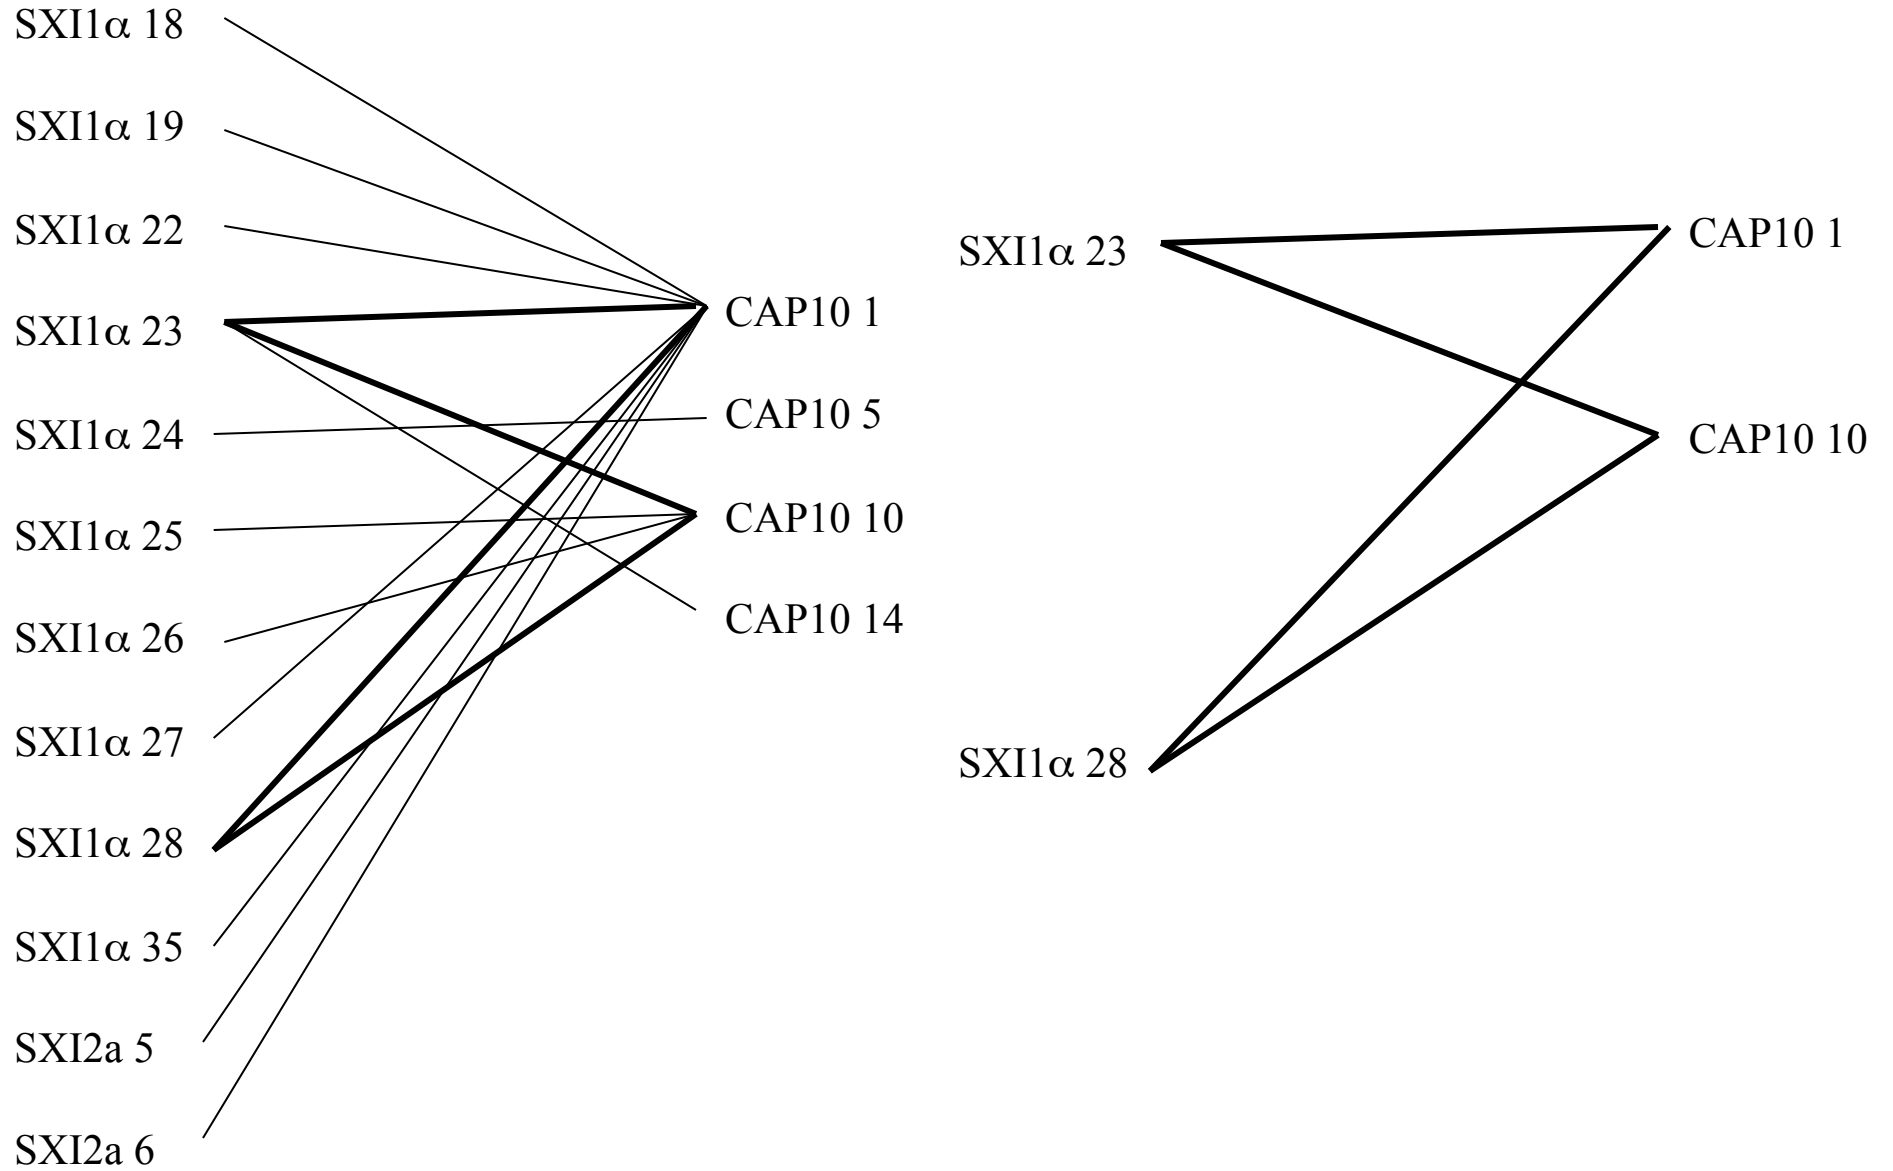

*SXI v. PLB1*

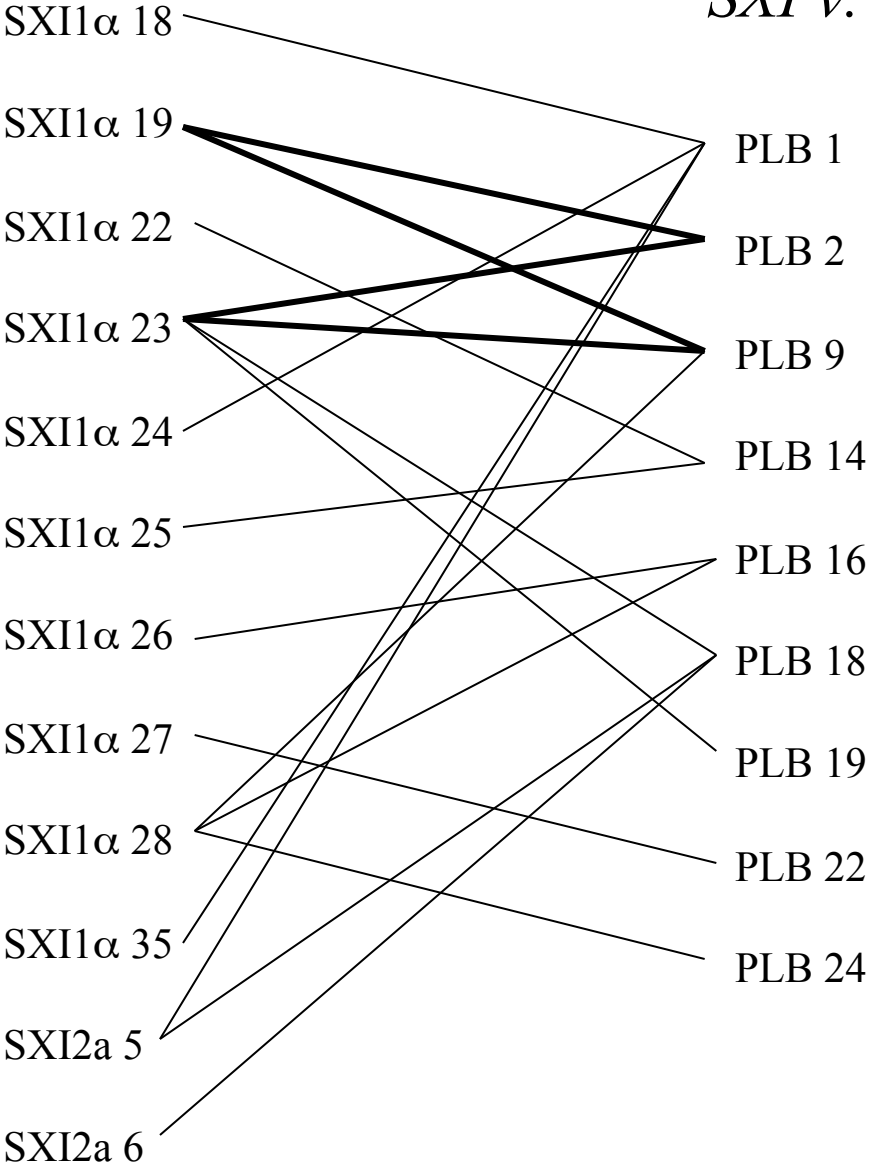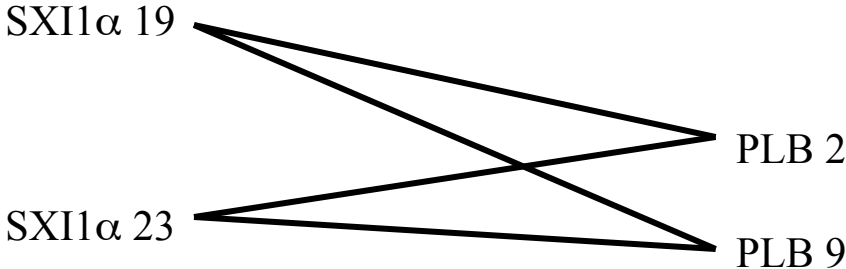

*SXI v. HOG1*

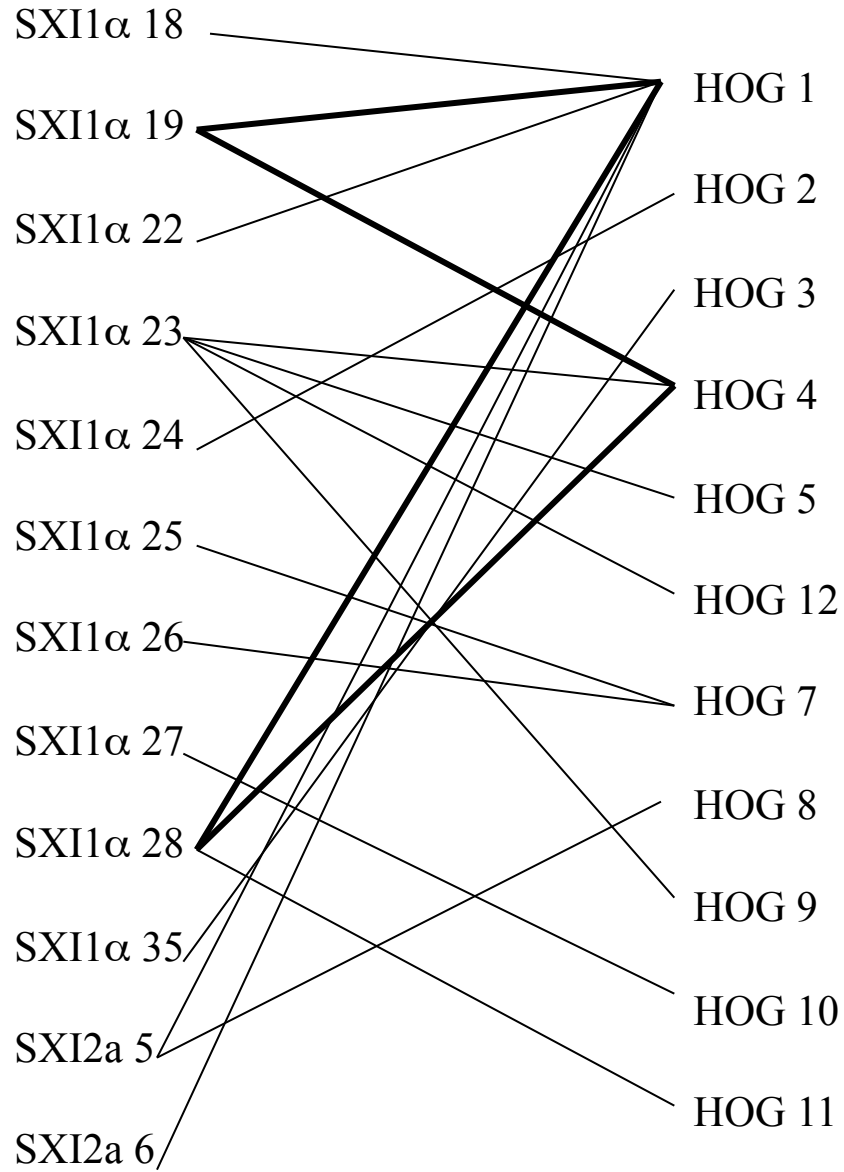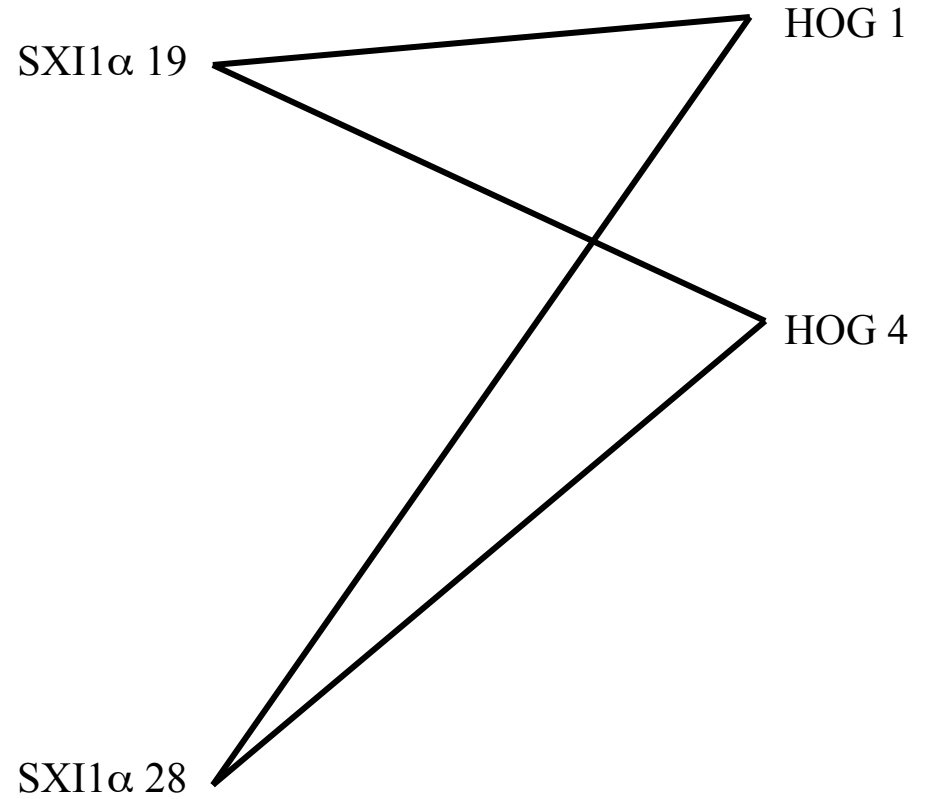

*SXI v. FHB1*

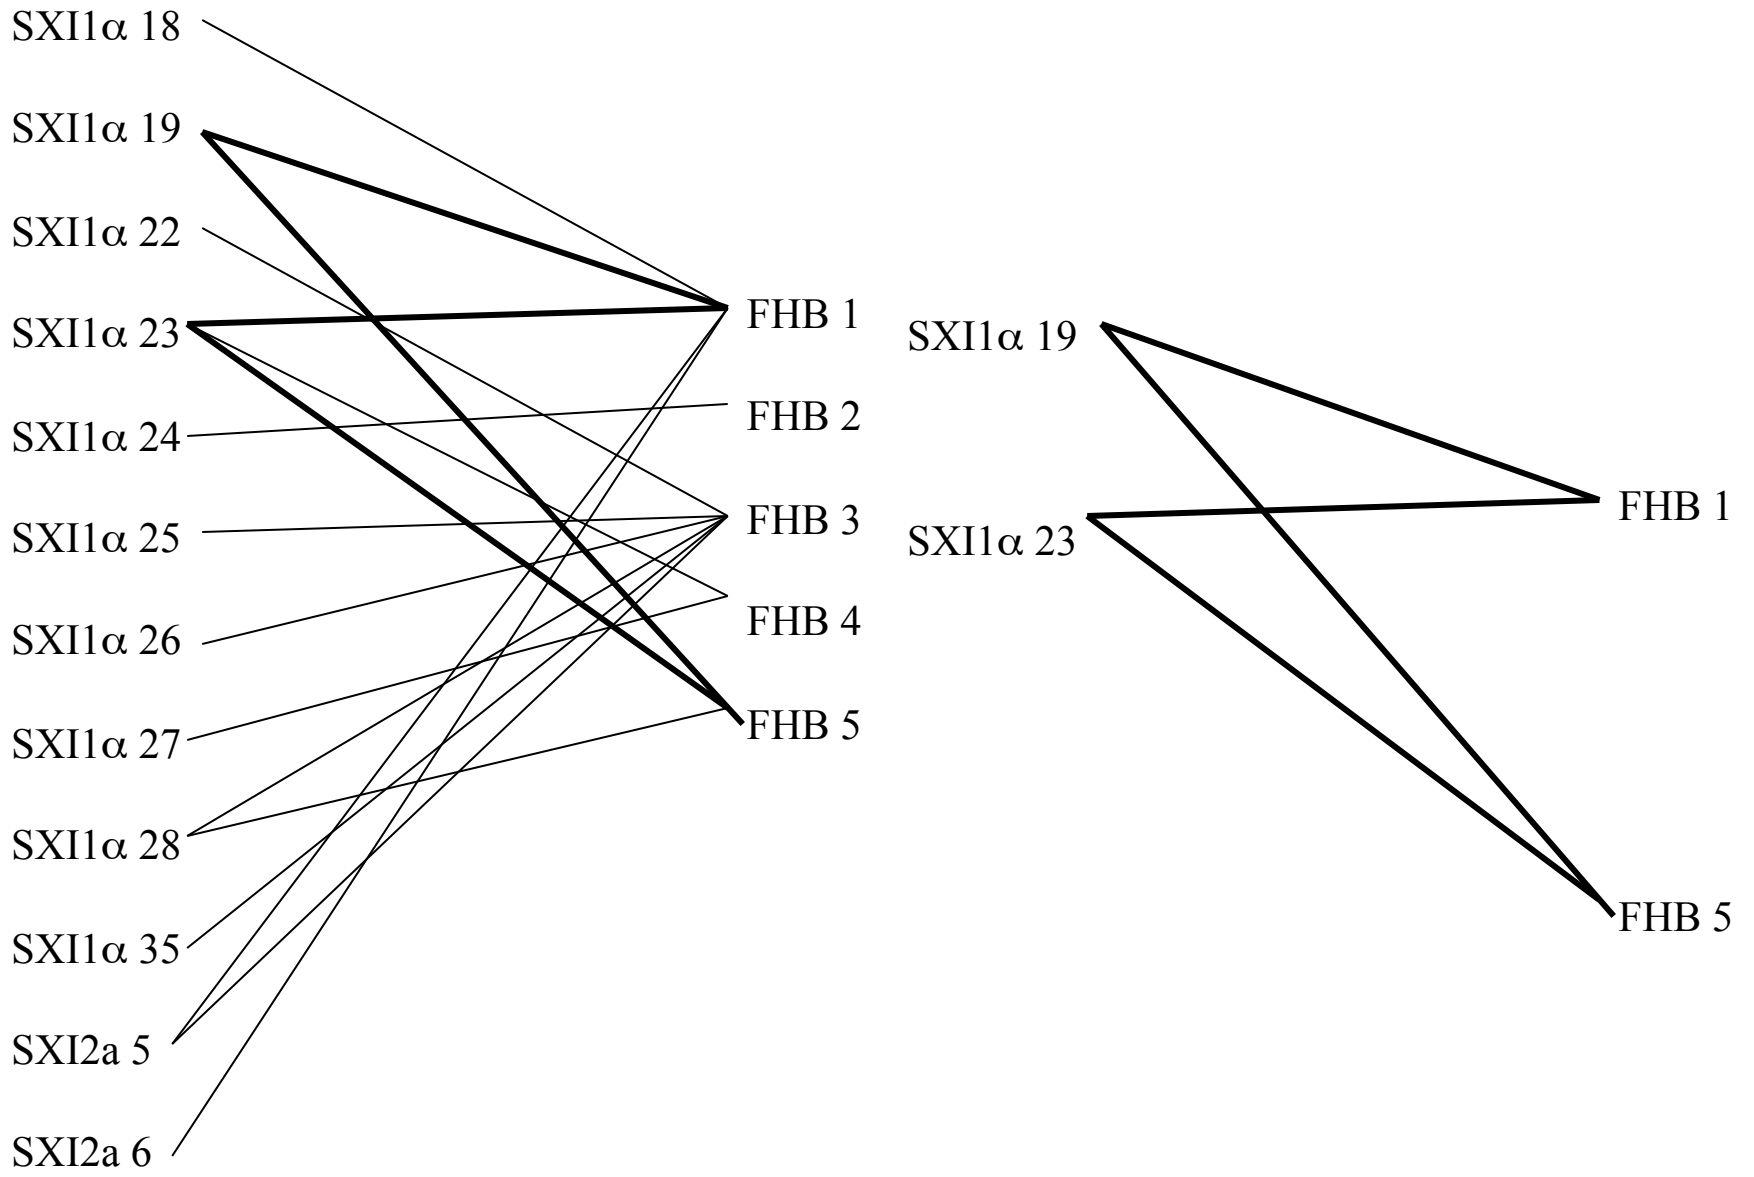

*IGS1 v. FHB1*

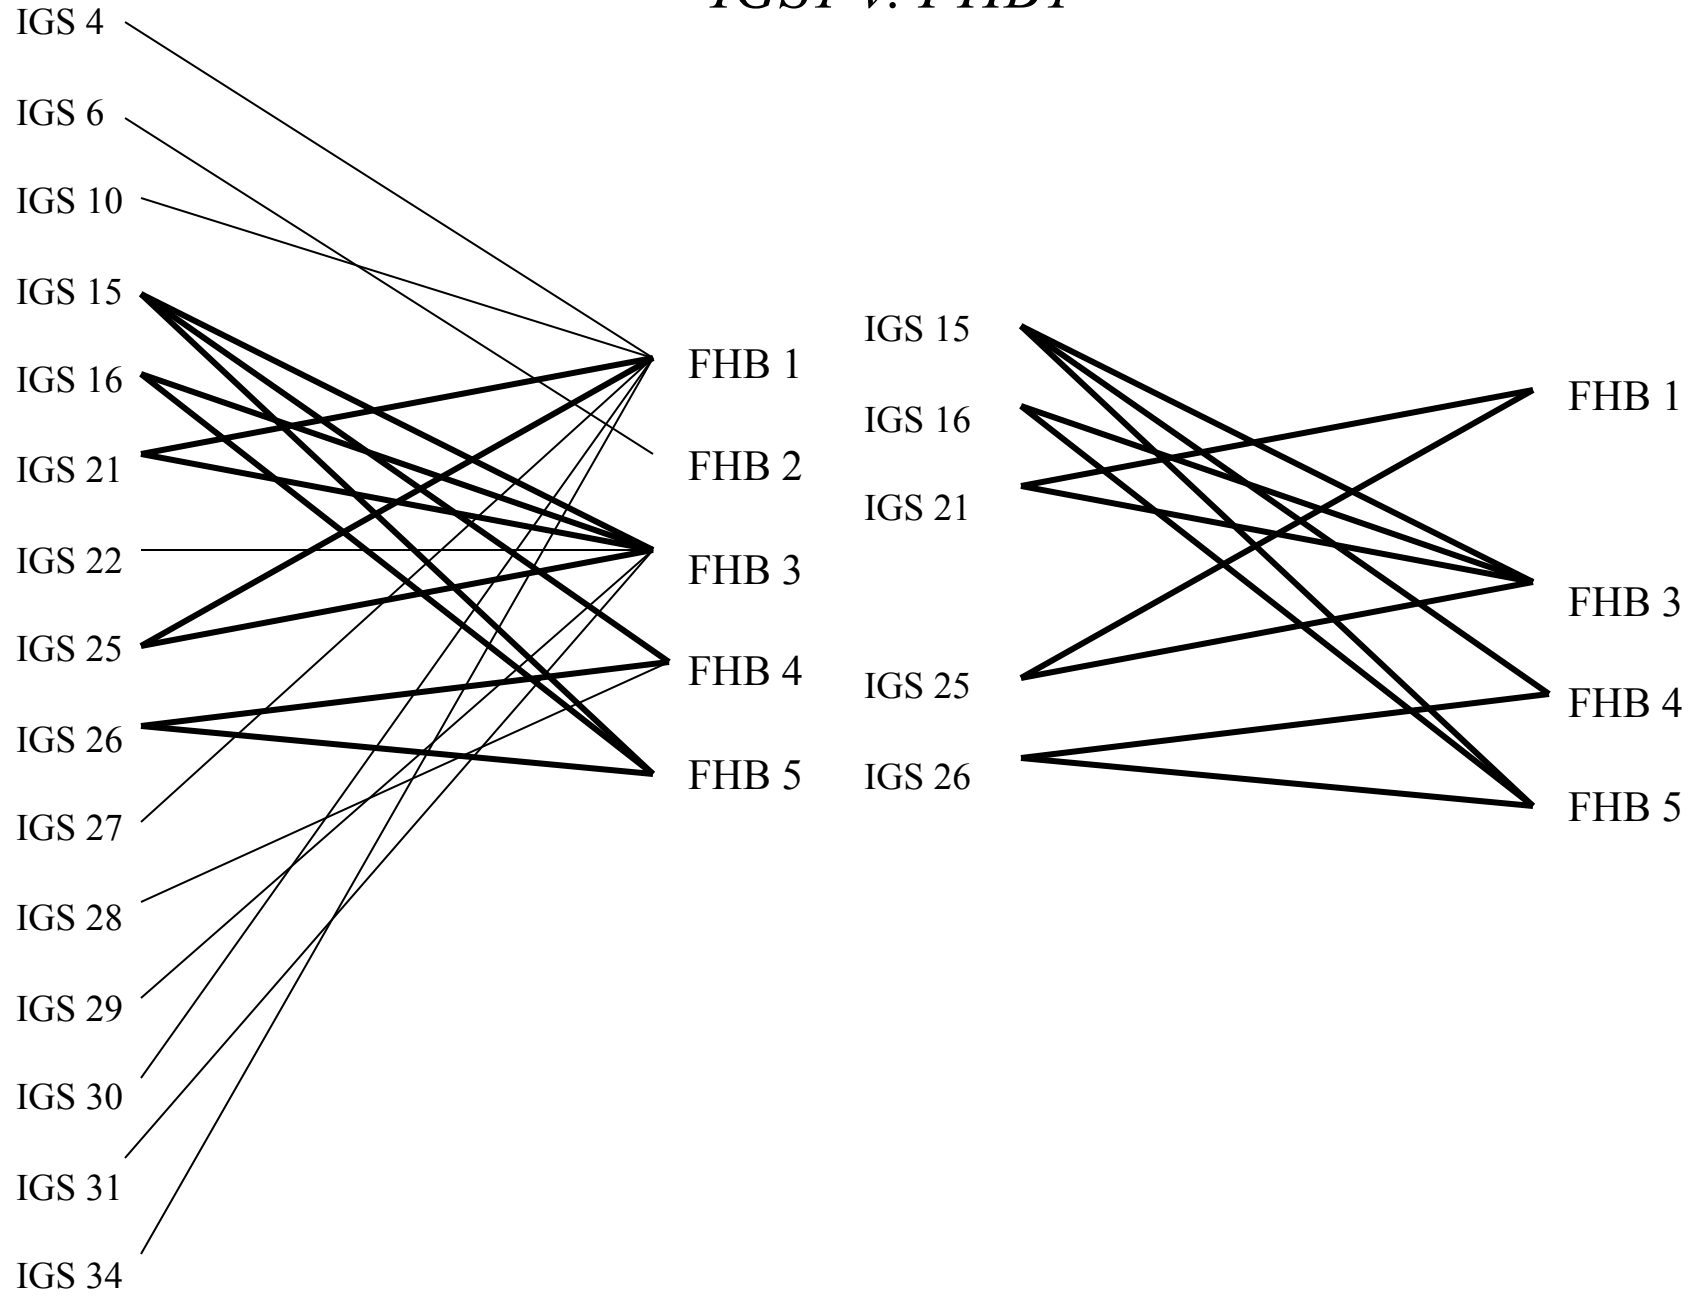



*IGS1 v. FTR1*

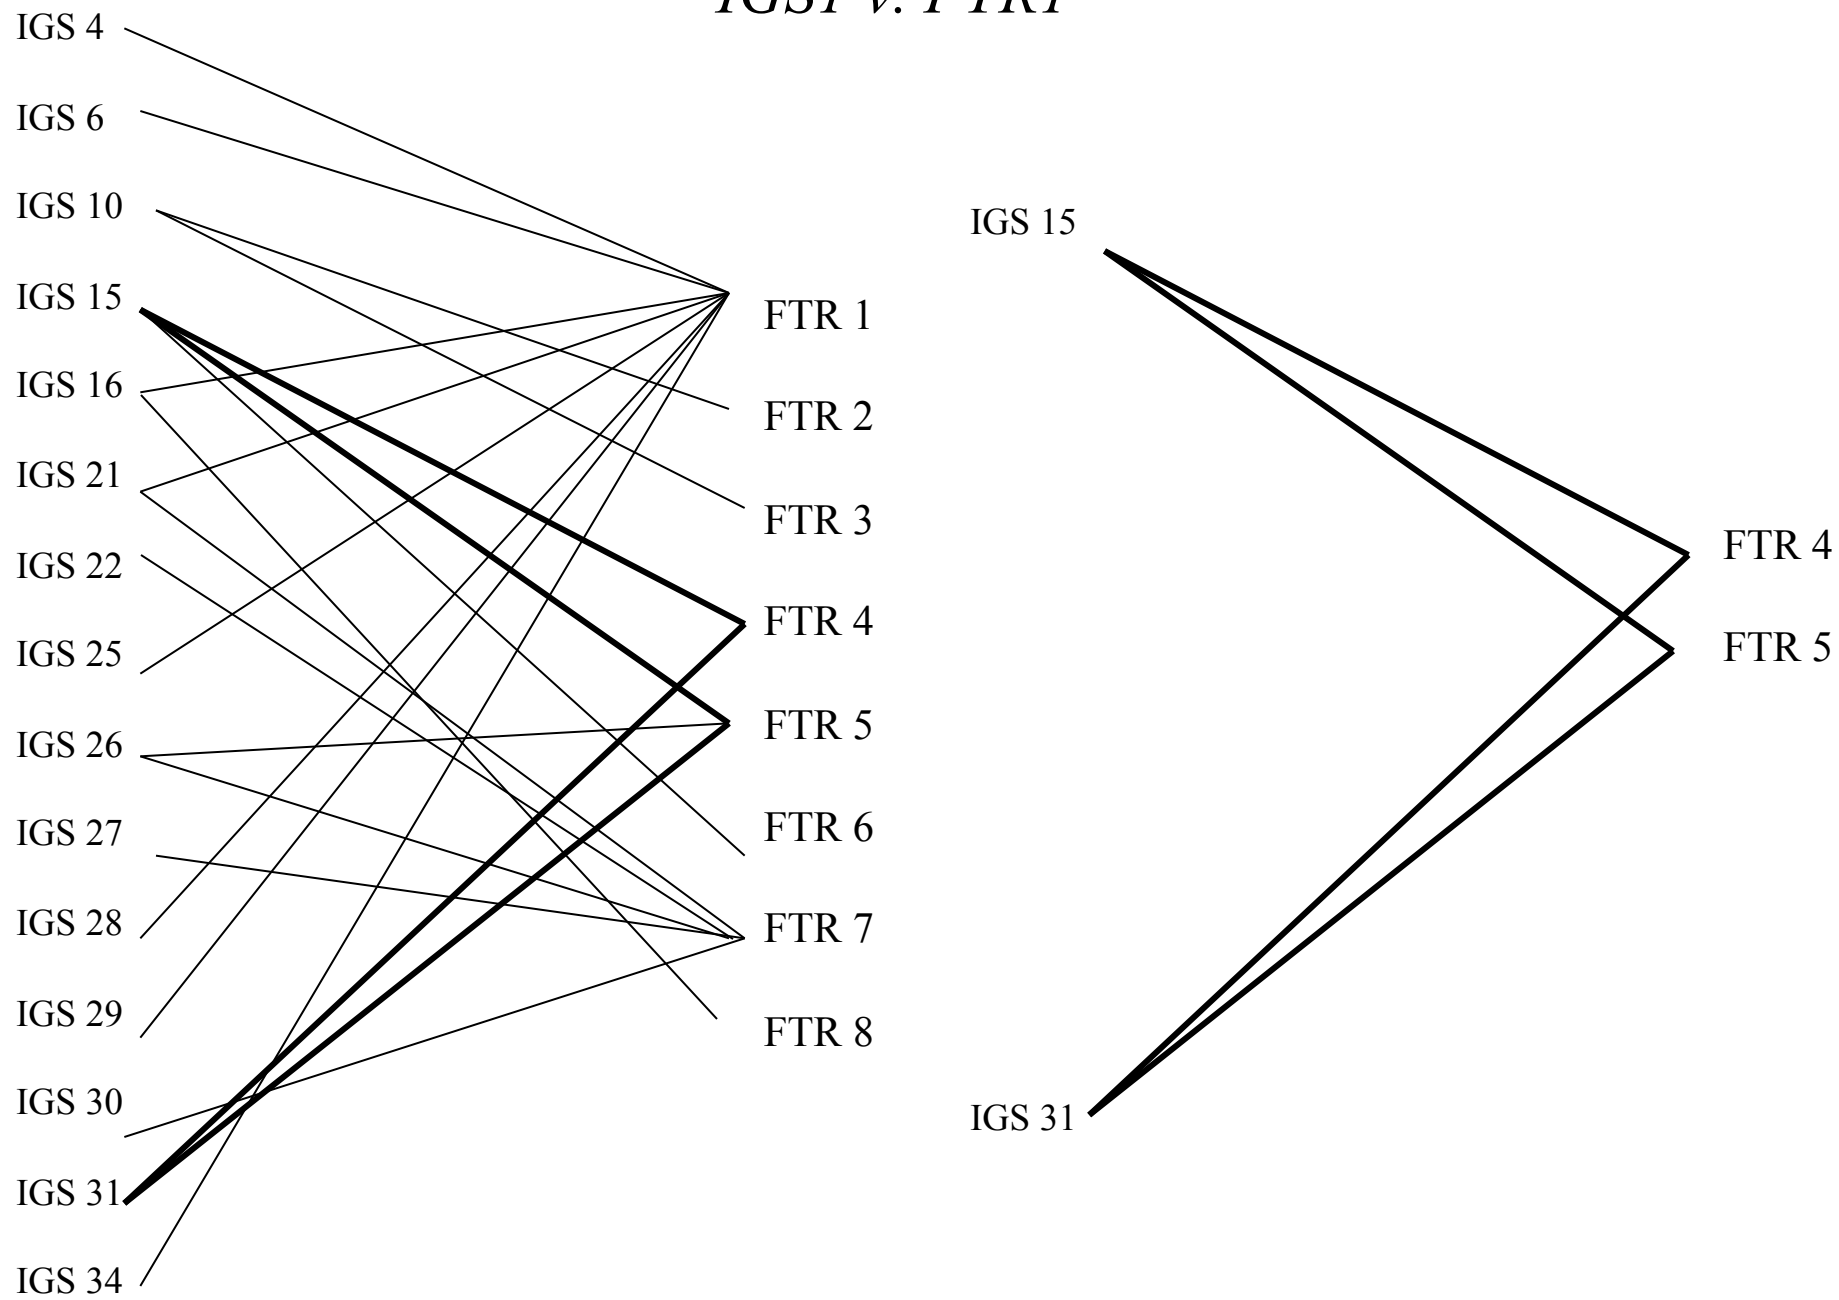

*TEF1 v. GPD1*

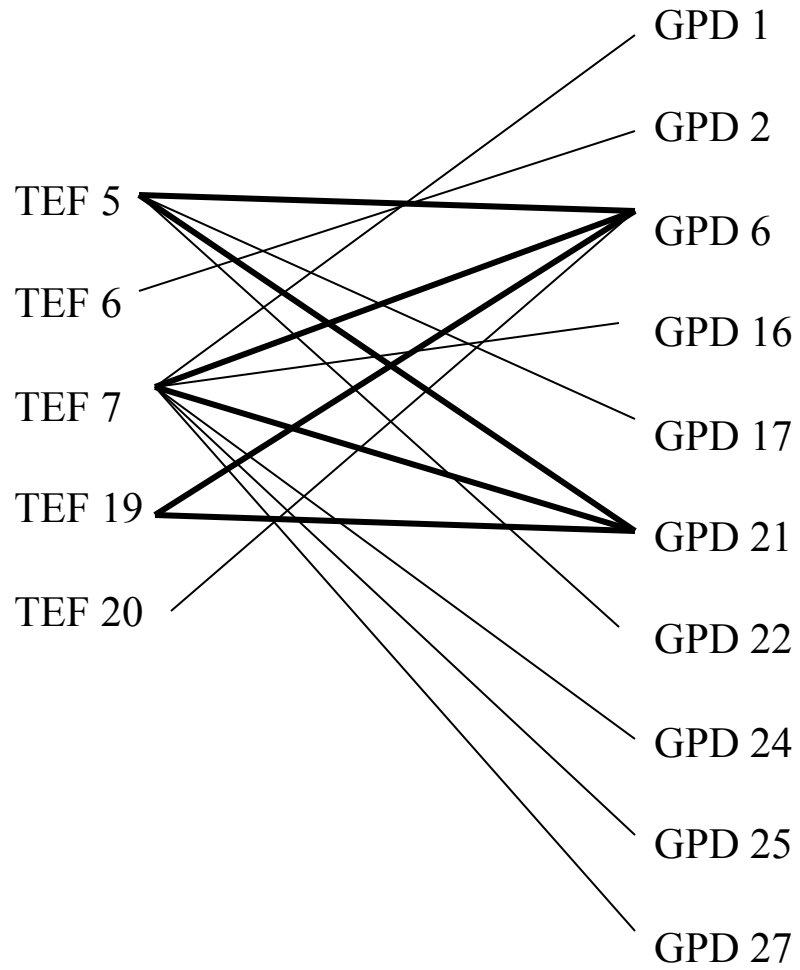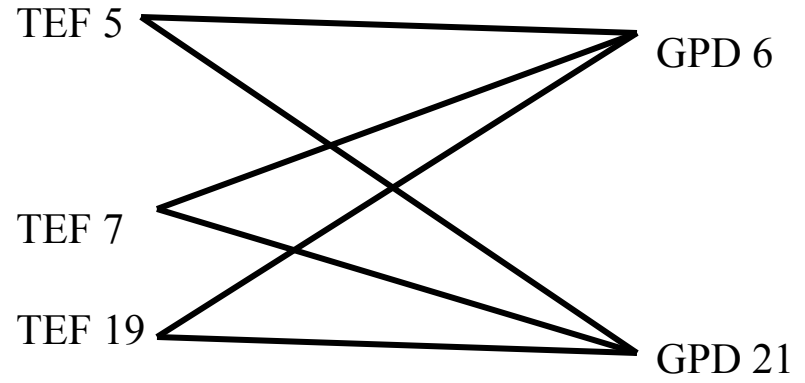

*TEF1 v. CAP10*

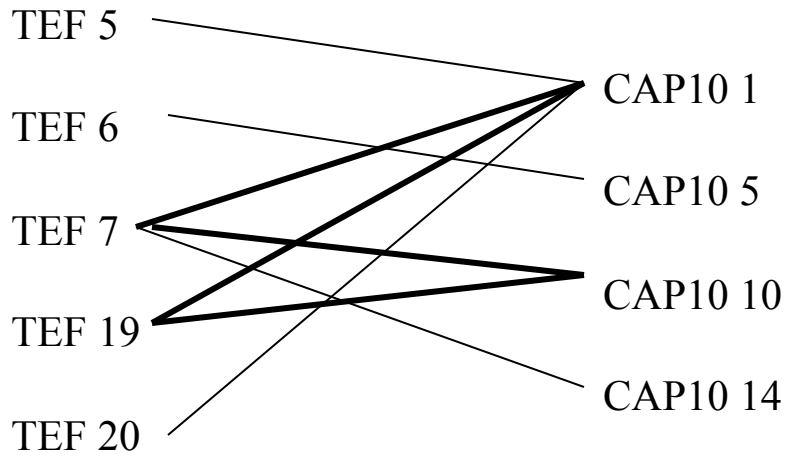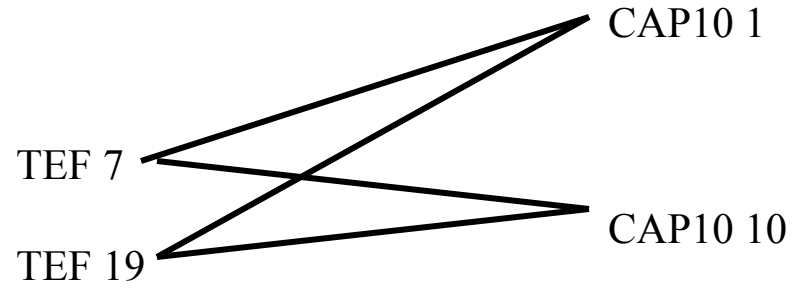

*TEF1 v. PLB1*

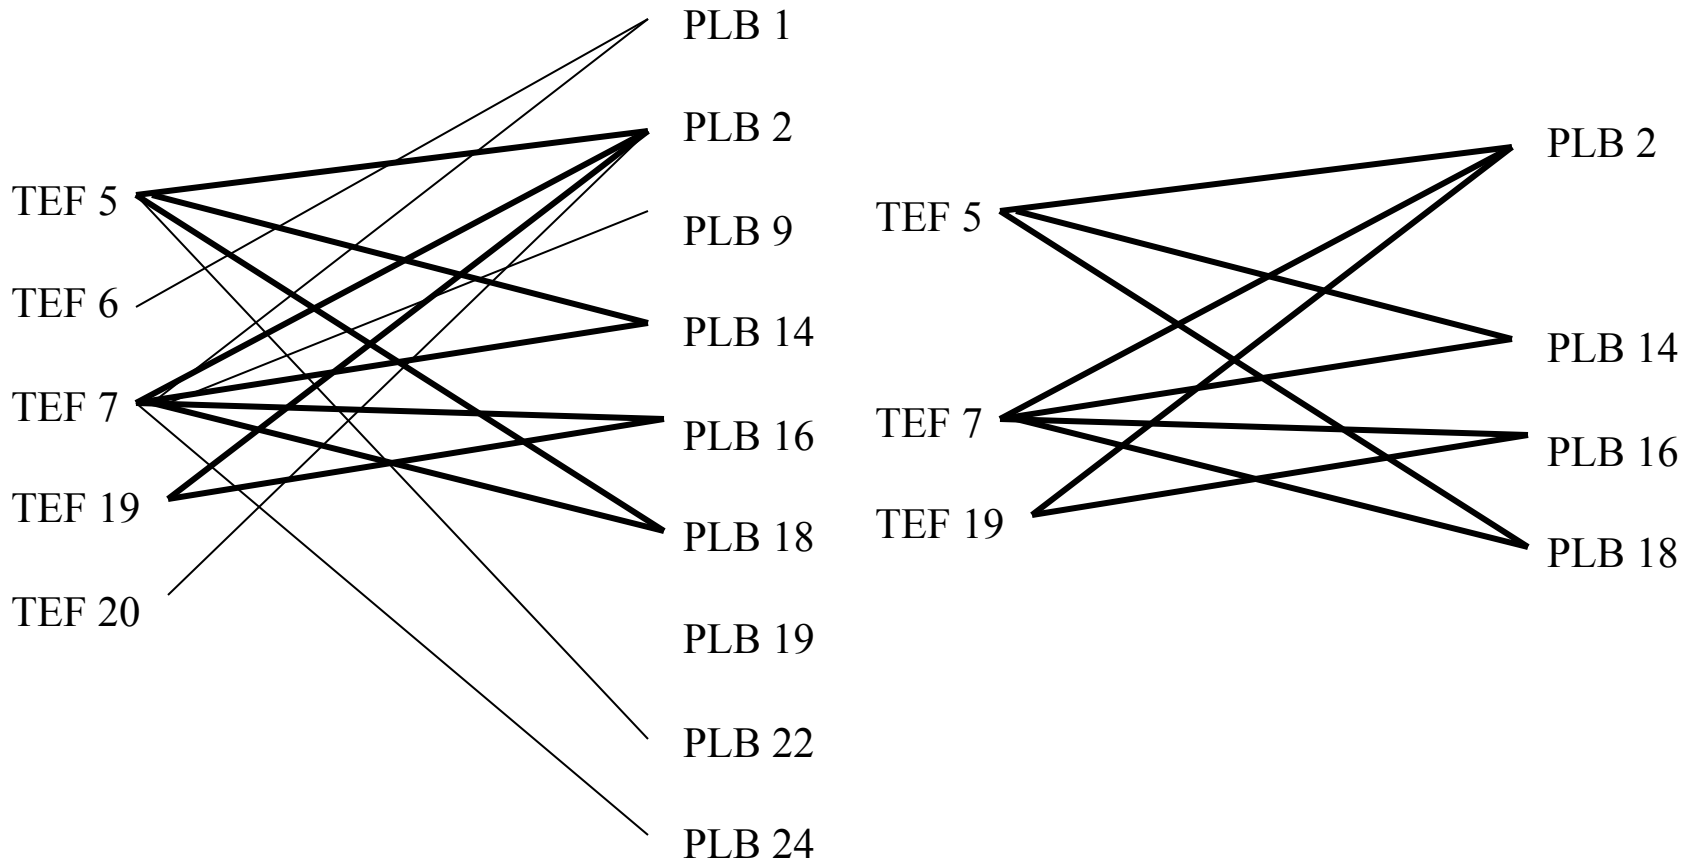

*TEF1 v. HOG1*

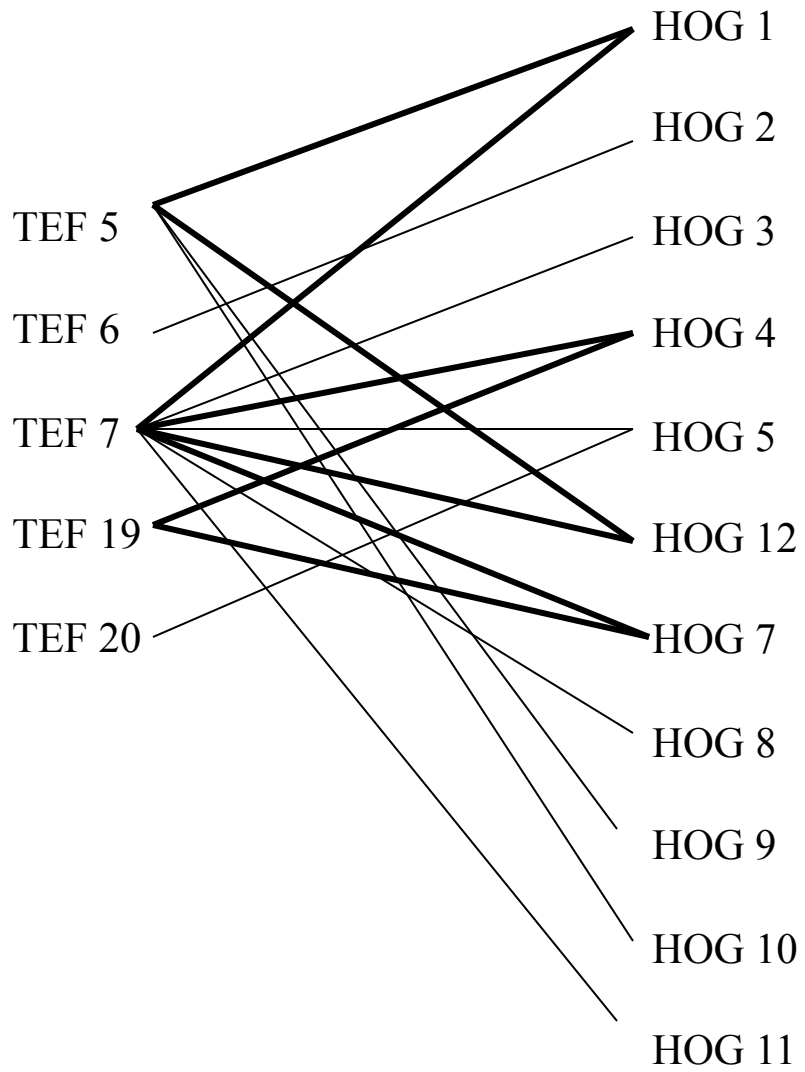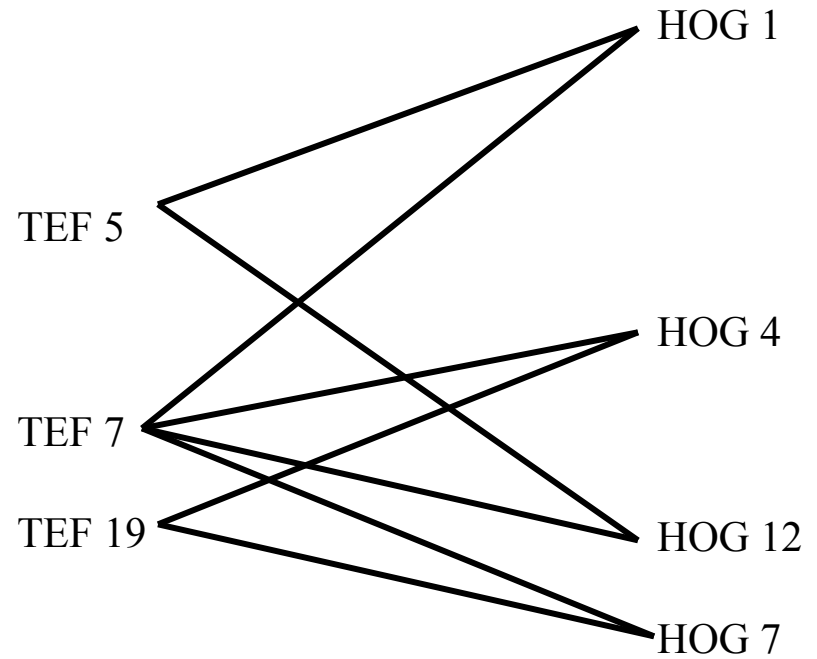

*TEF1 v. CNB1*

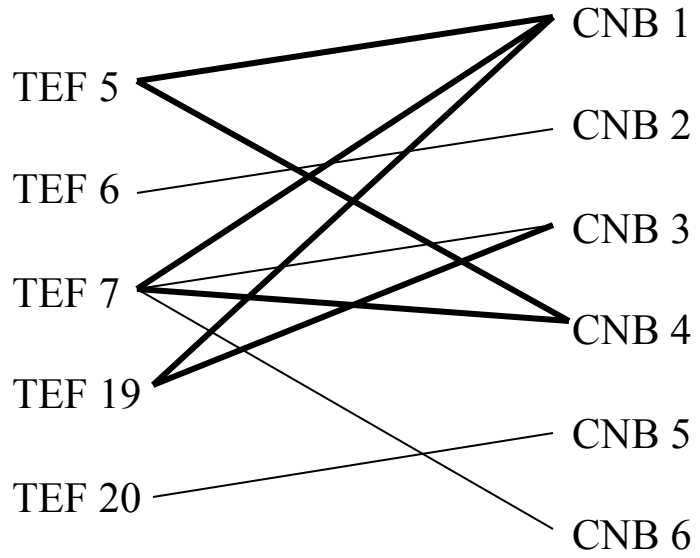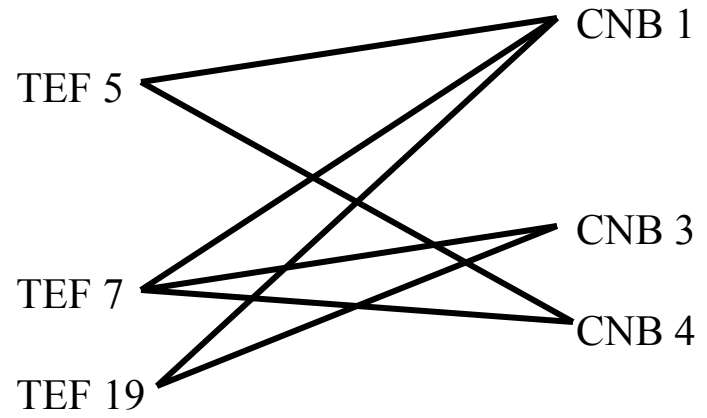

*TEF1 v. TOR1*

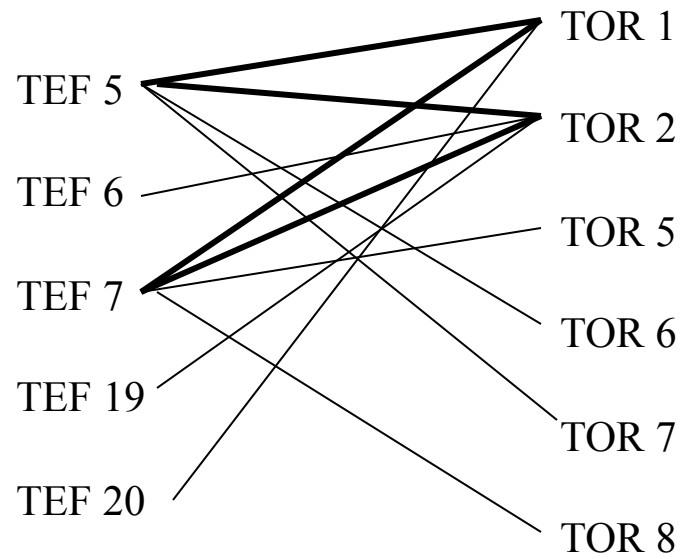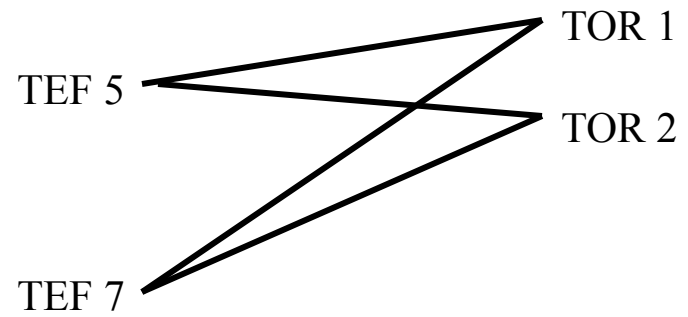

*TEF1 v. CRG1*

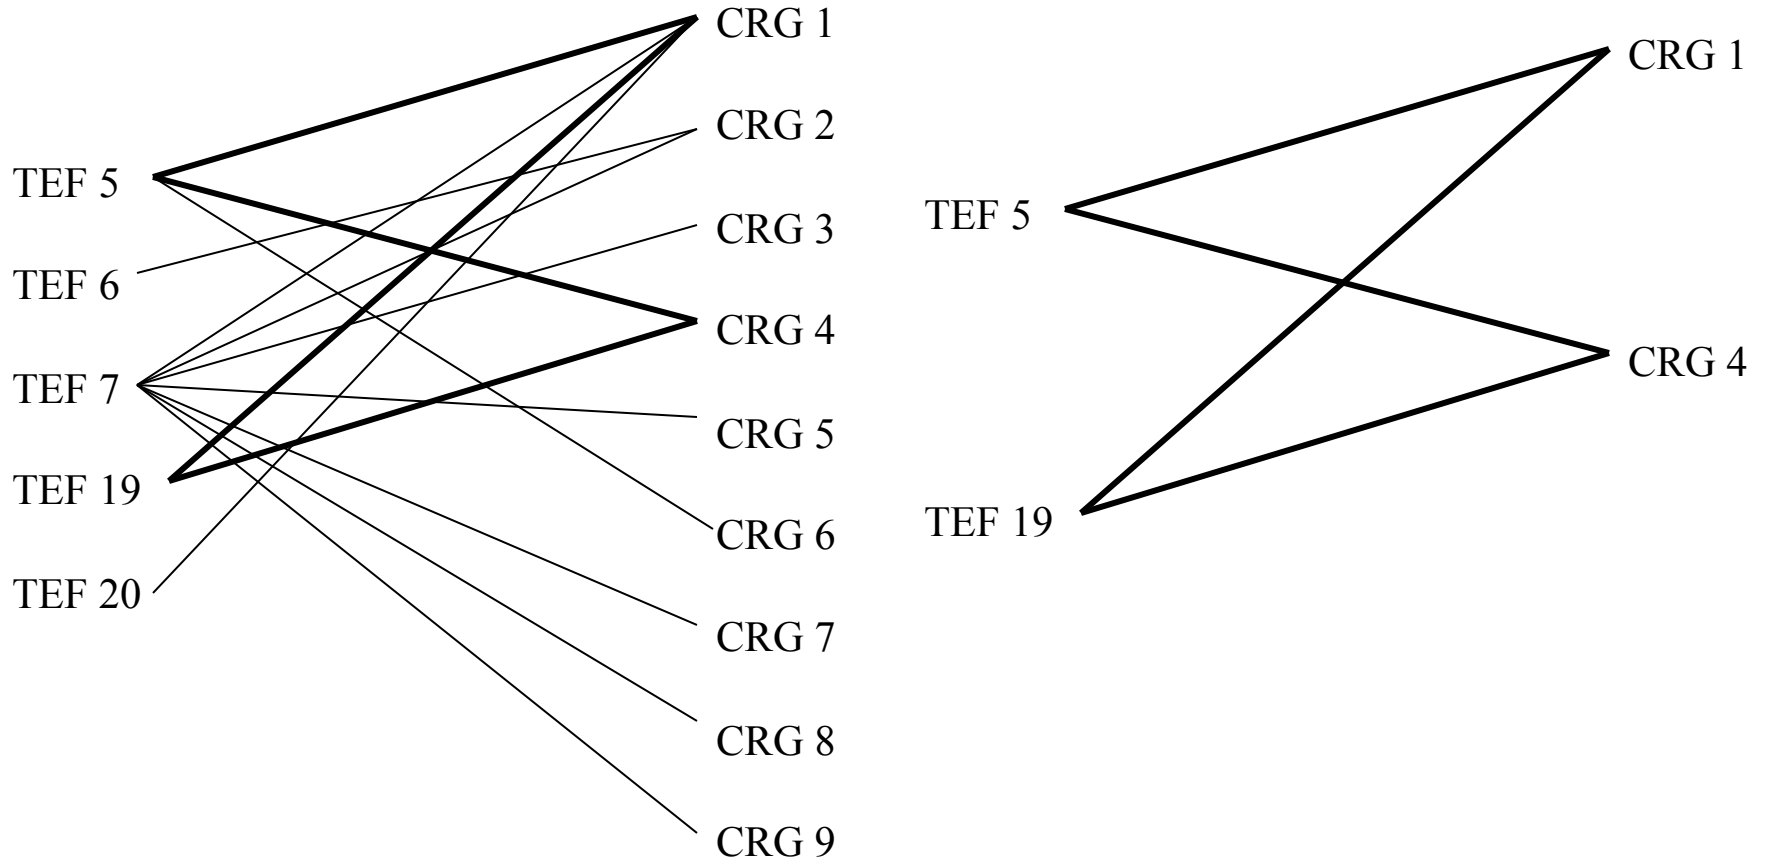



*TEF1 v. FHB1*

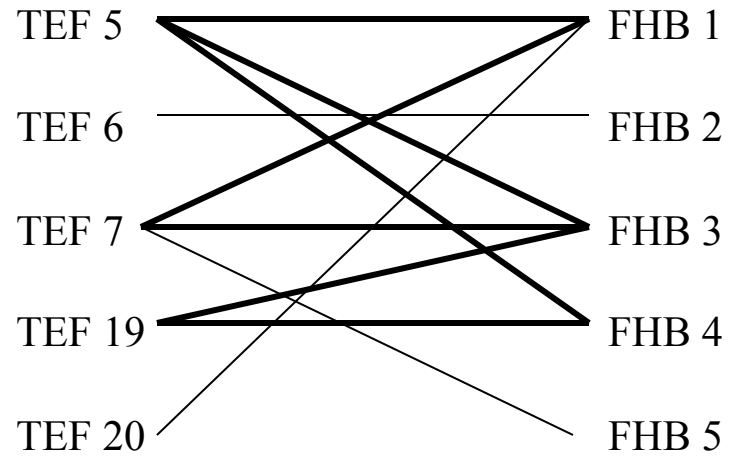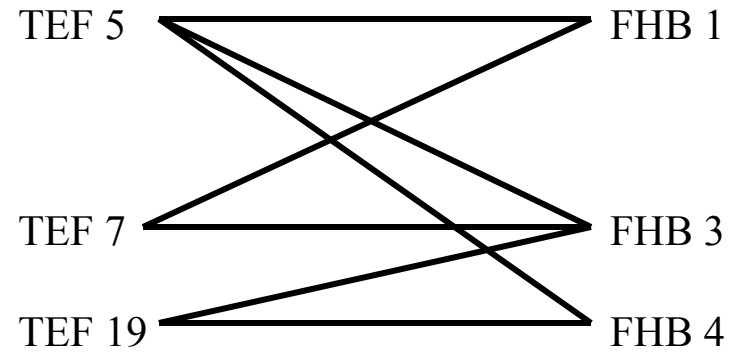

*TEF1 v. FTR1*

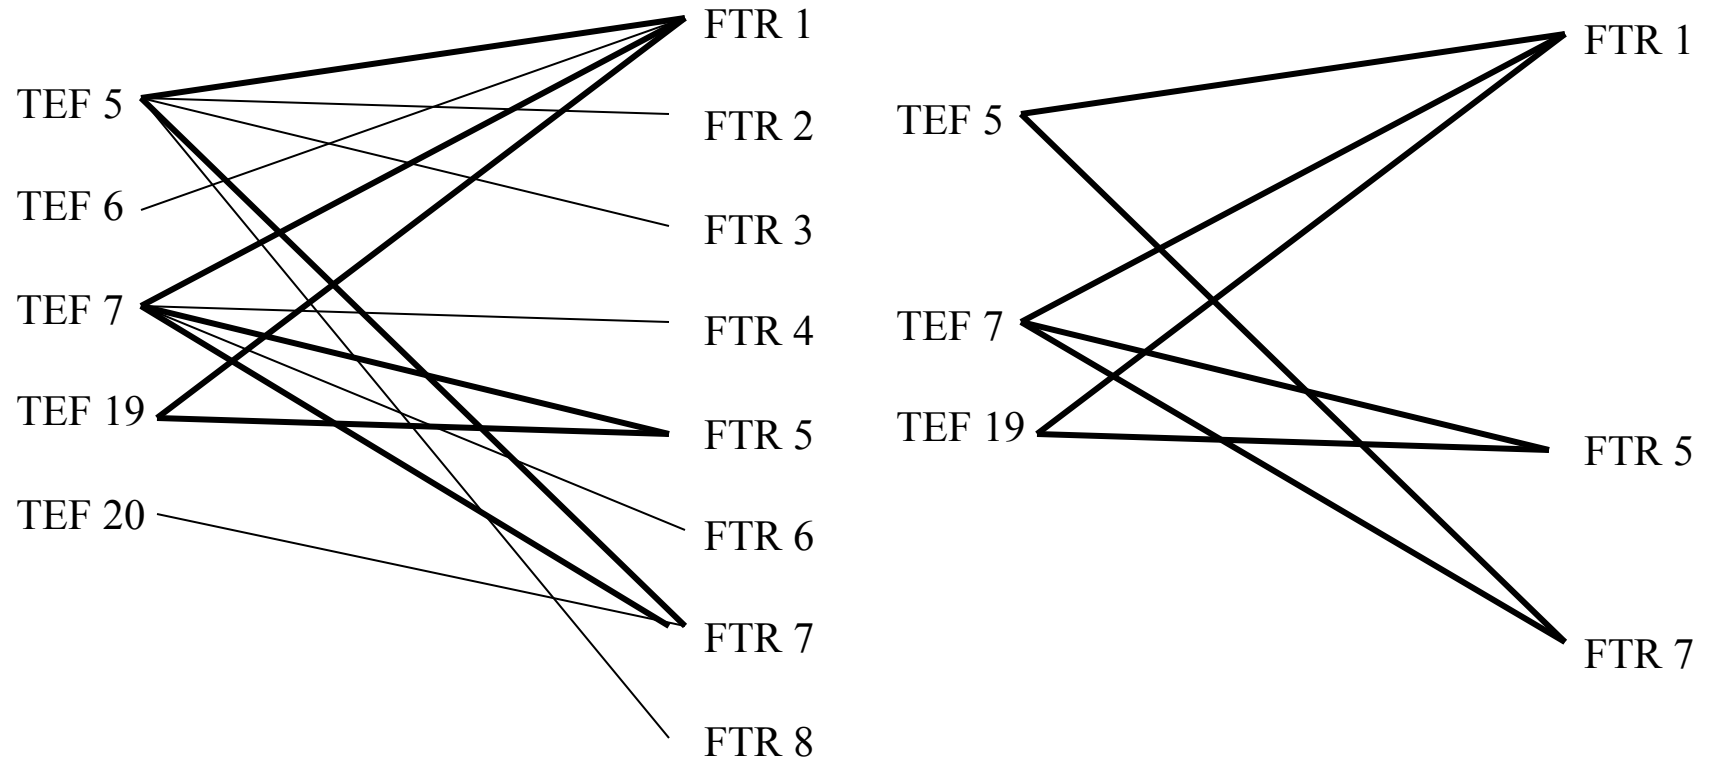

*TEF1 v. CAP59*

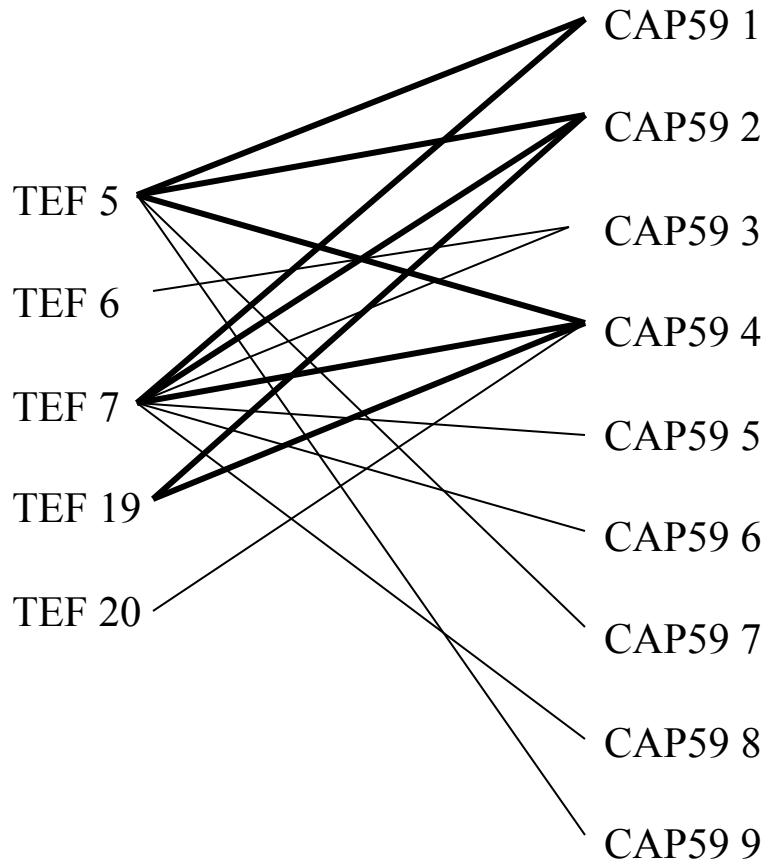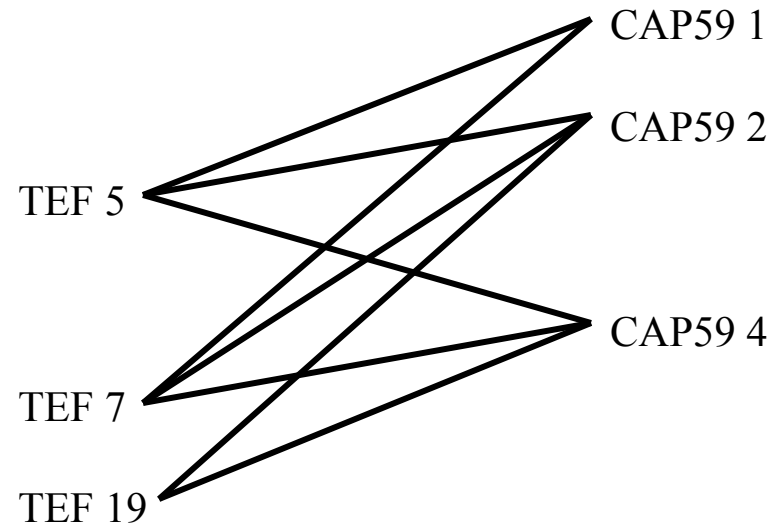

## *GPD1 v. LAC1*

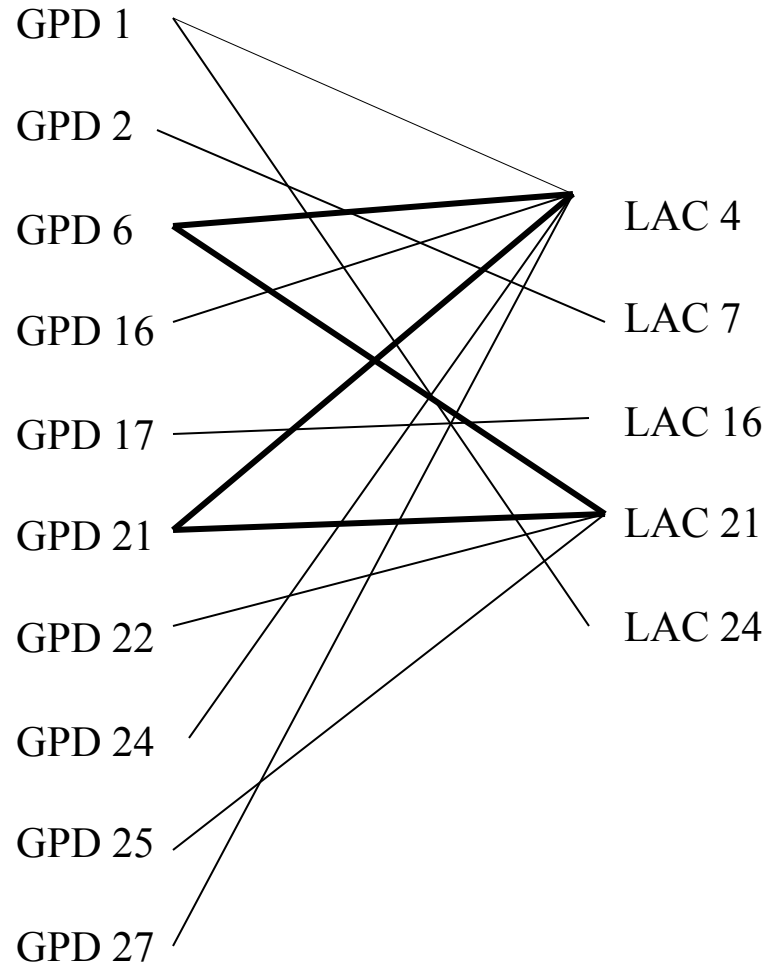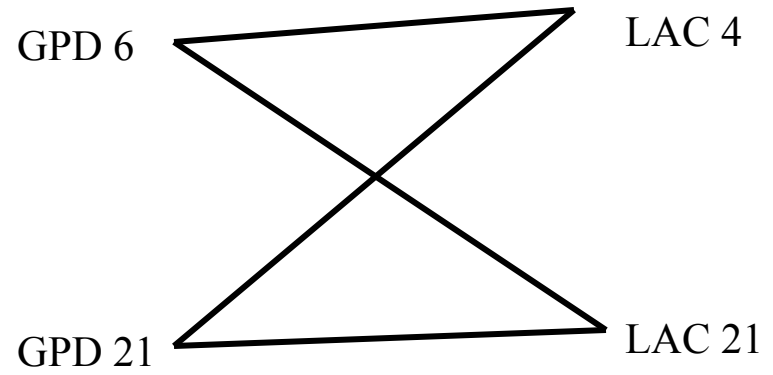

# *GPD1 v. CAP10*

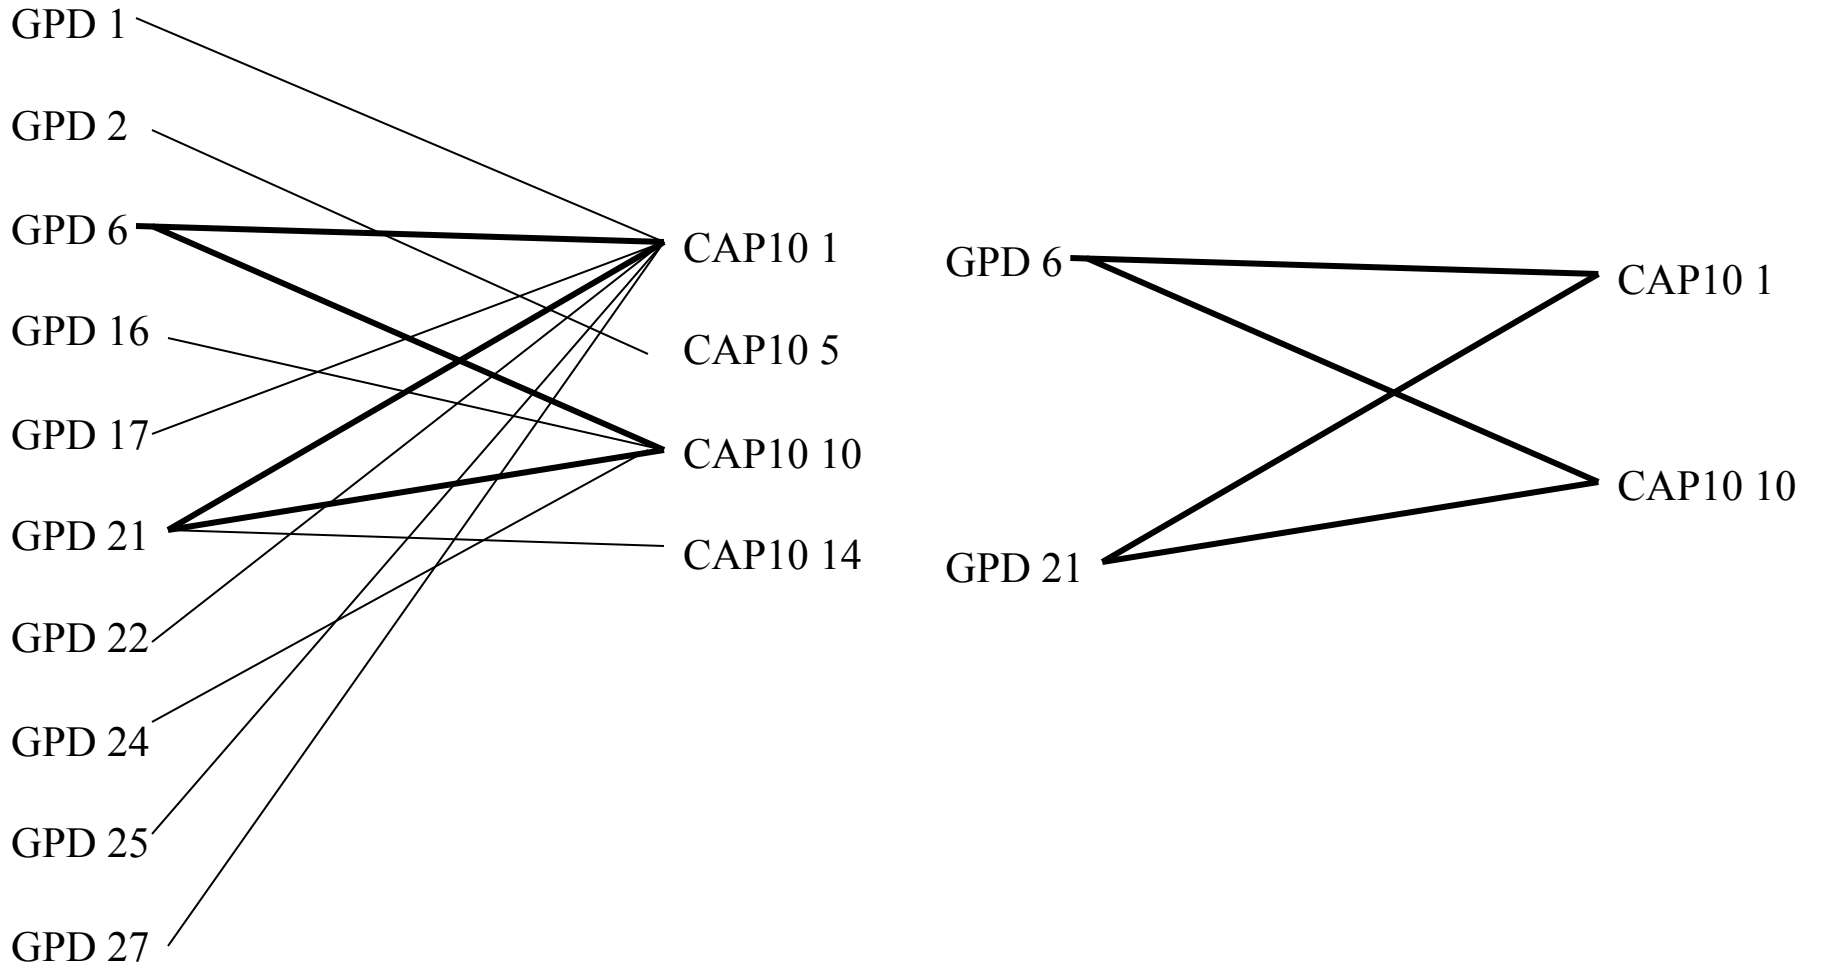

# *GPD1 v. PLB1*

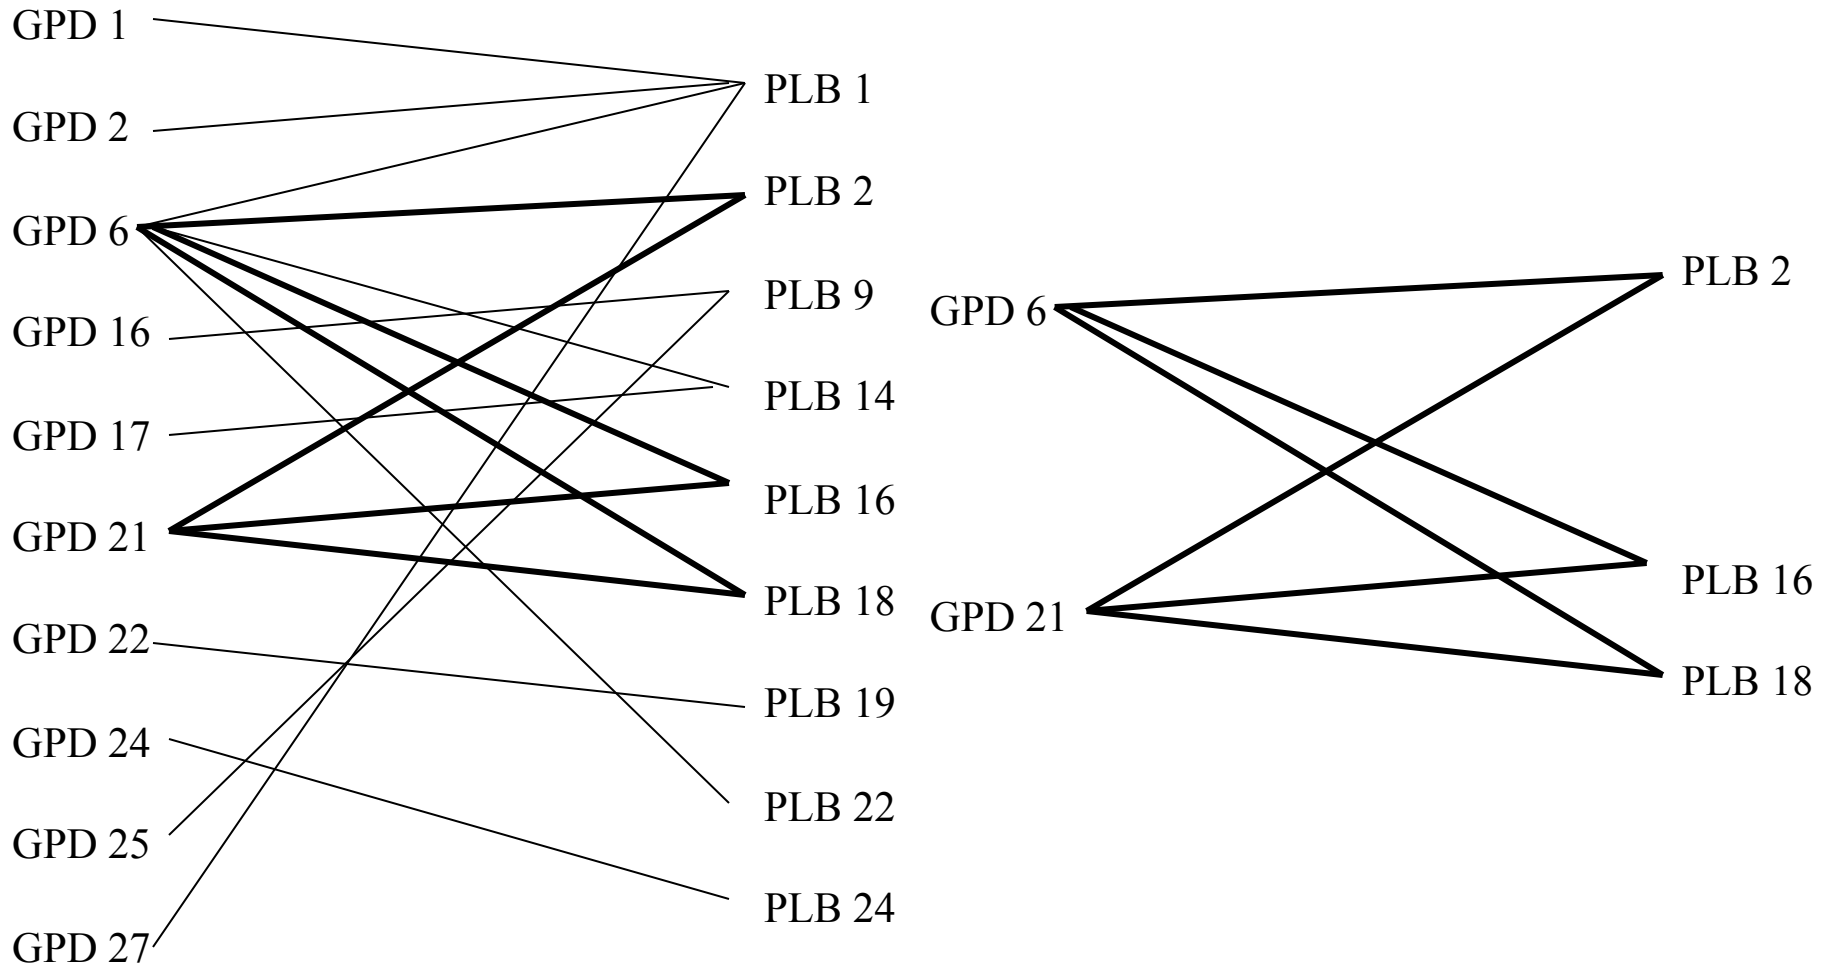

# *GPD1 v. TOR1*

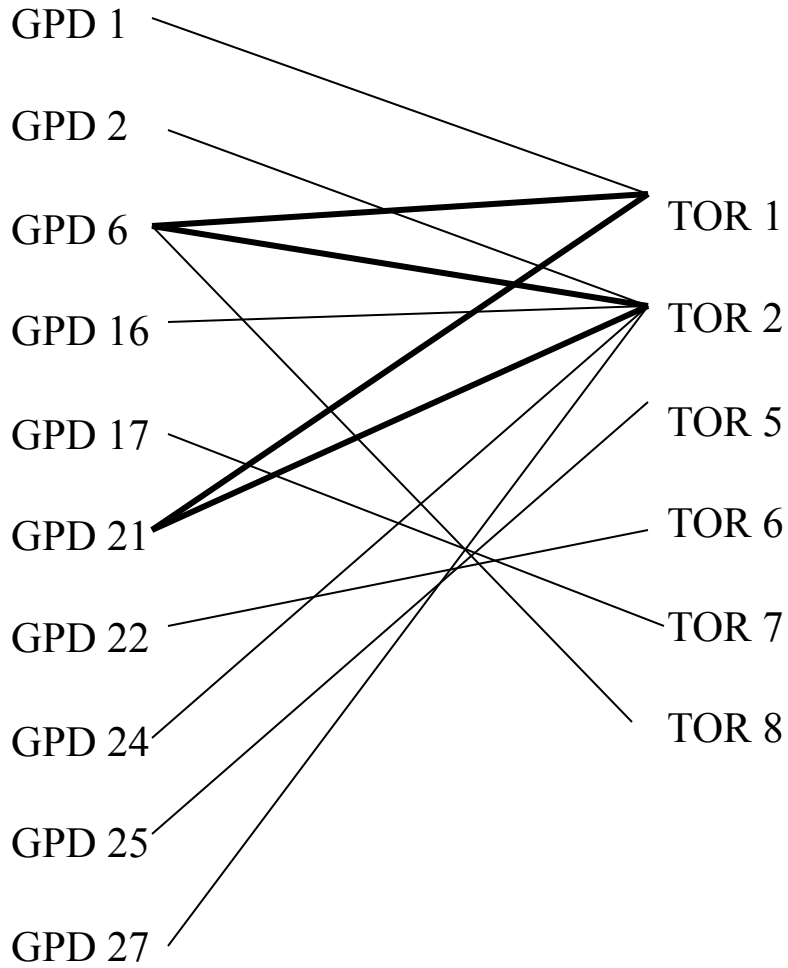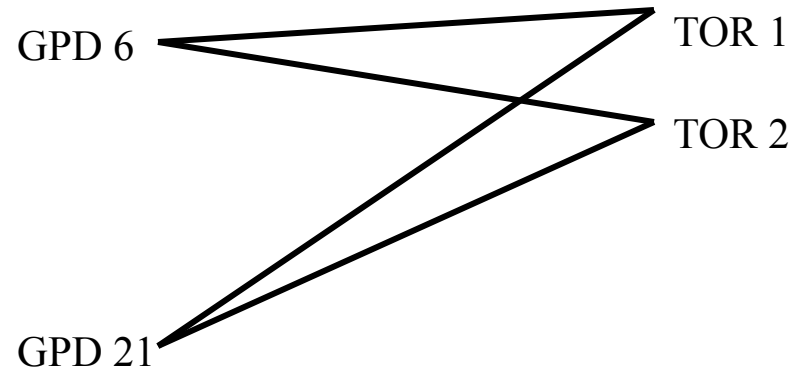

*GPD1 v. CRG1*

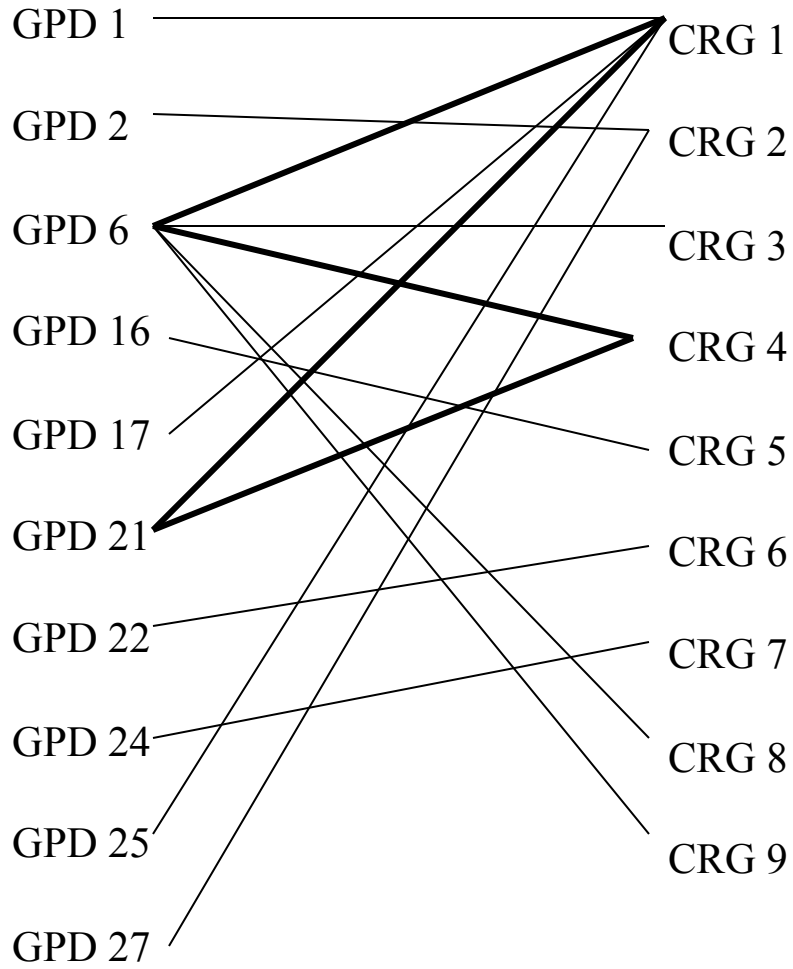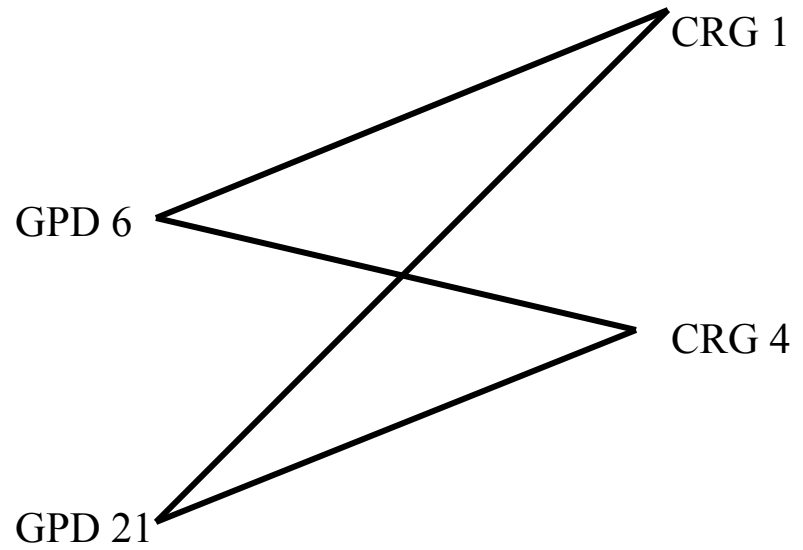



*GPD1 v. FHB1*

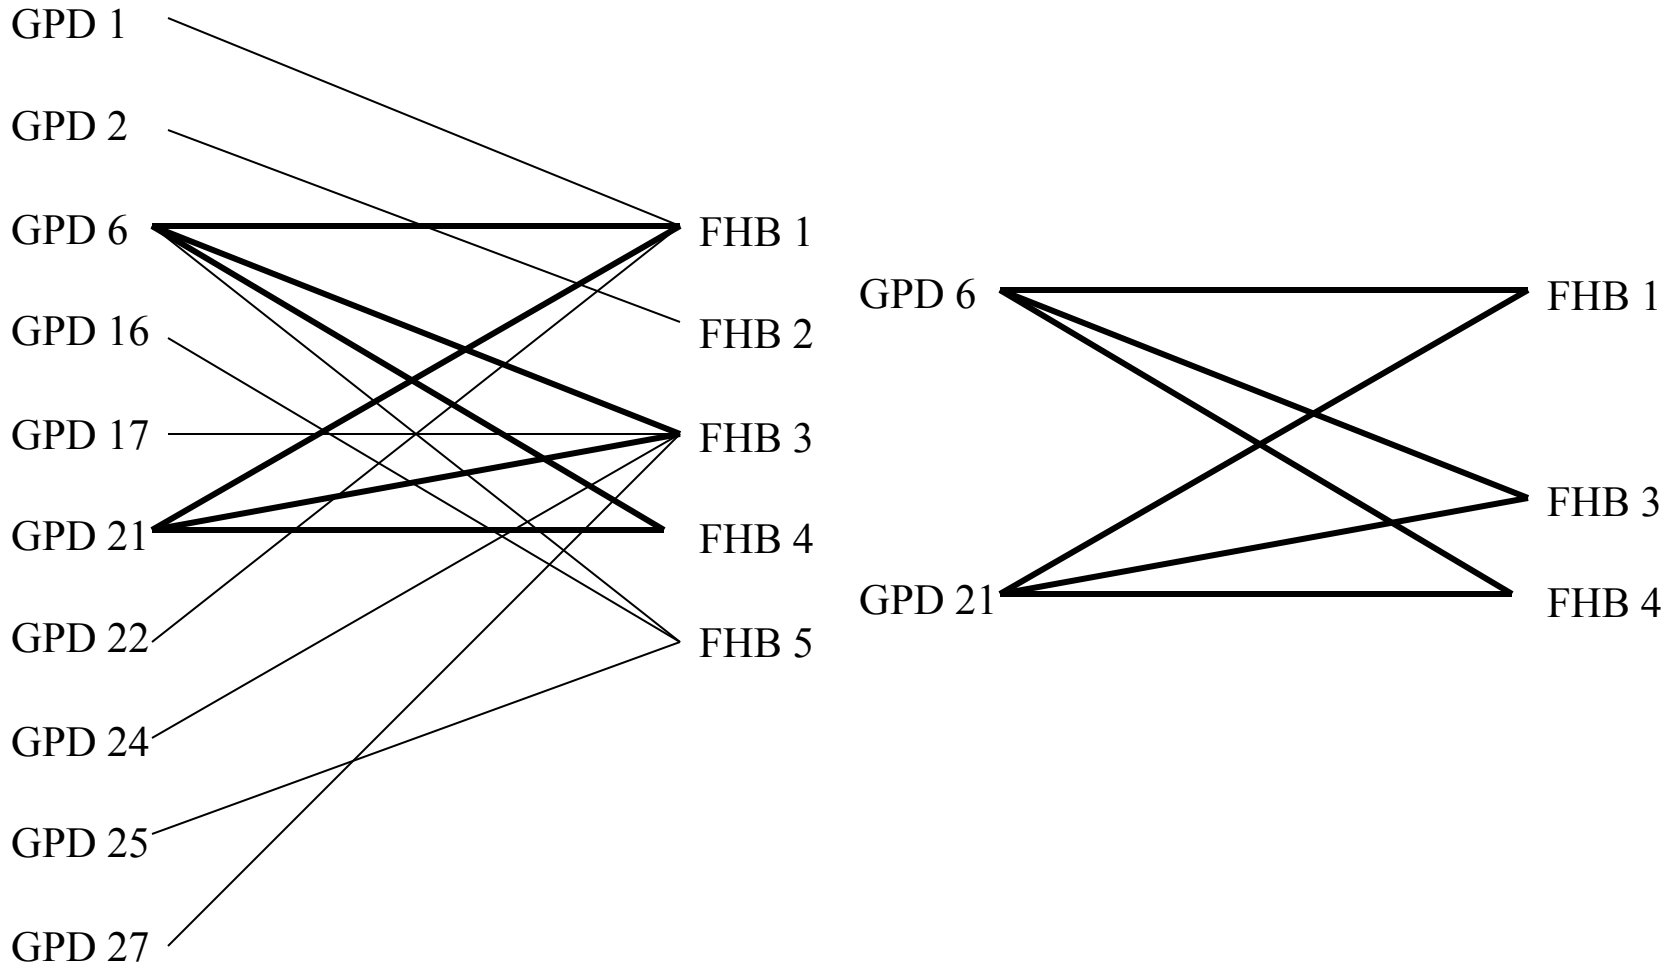

*GPD1 v. FTR1*

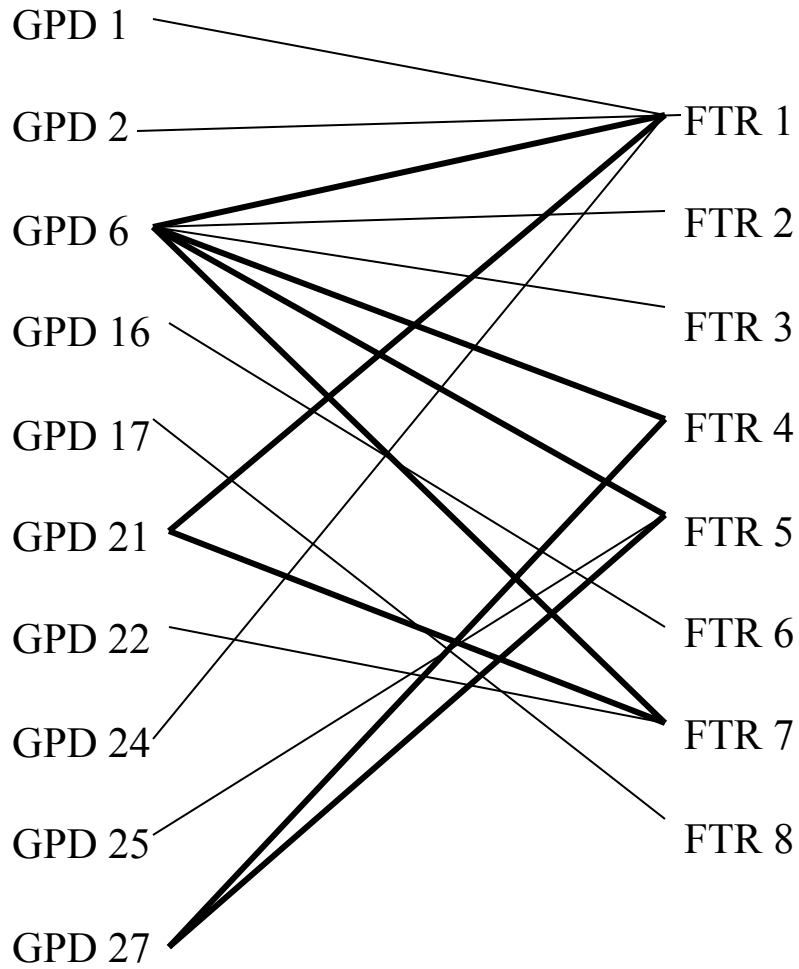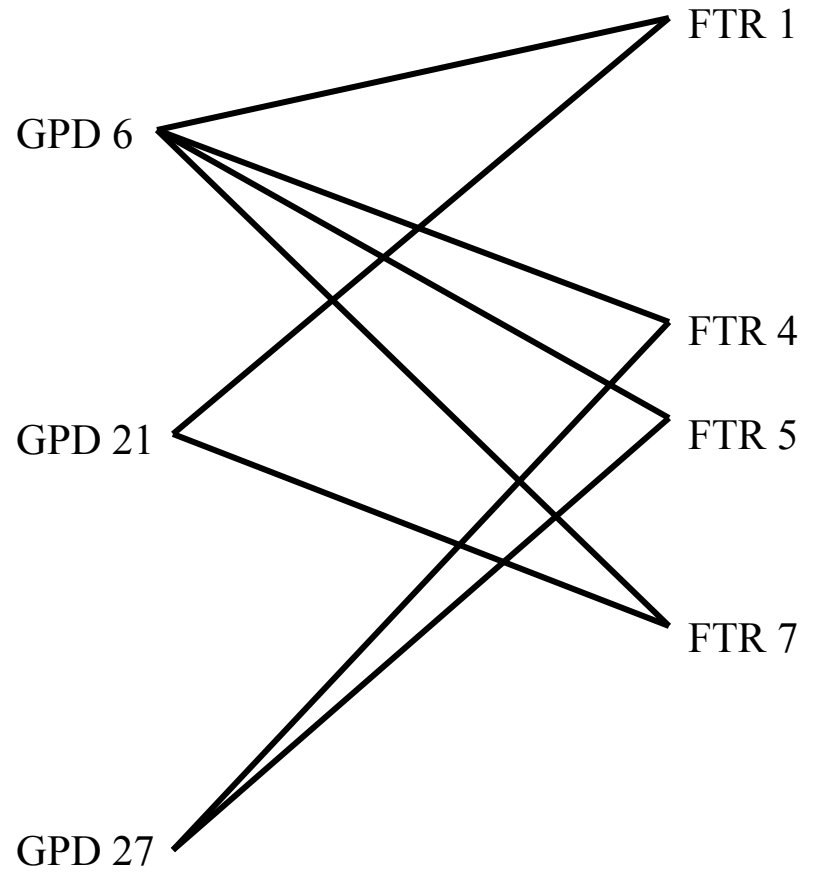

*LAC1 v. PLB1*

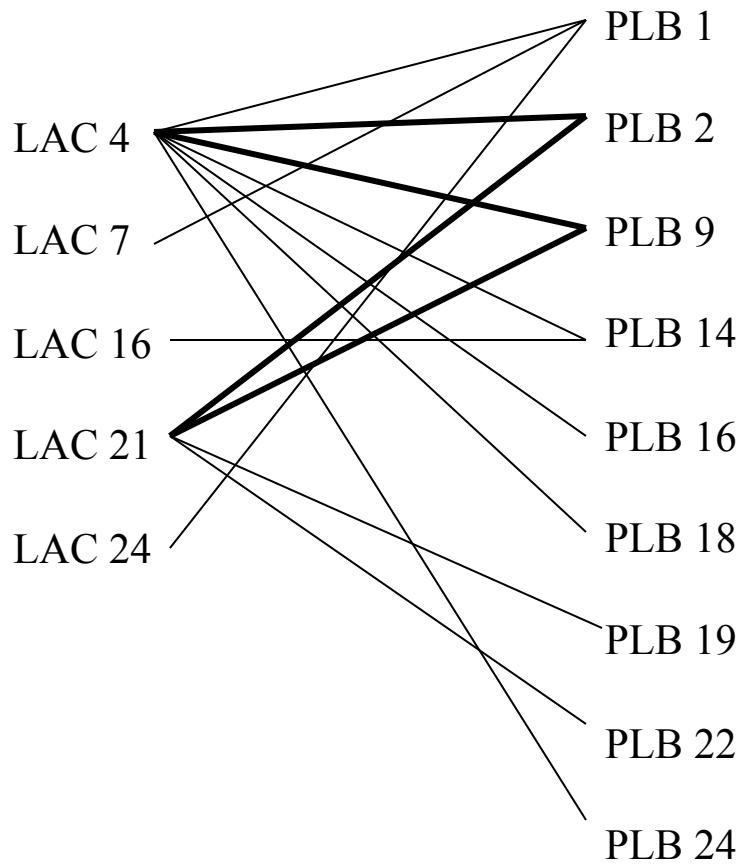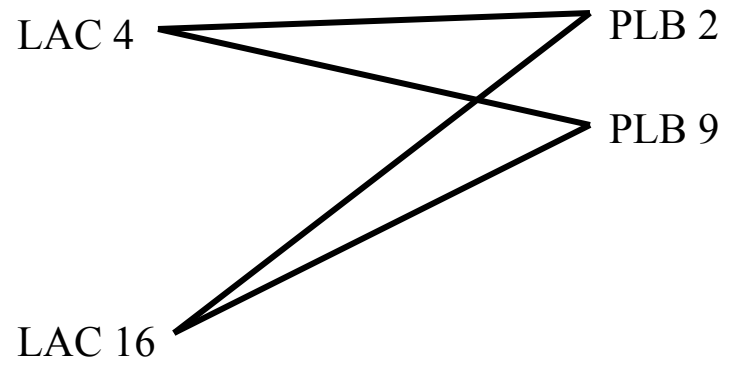

*LAC1 v. HOG1*

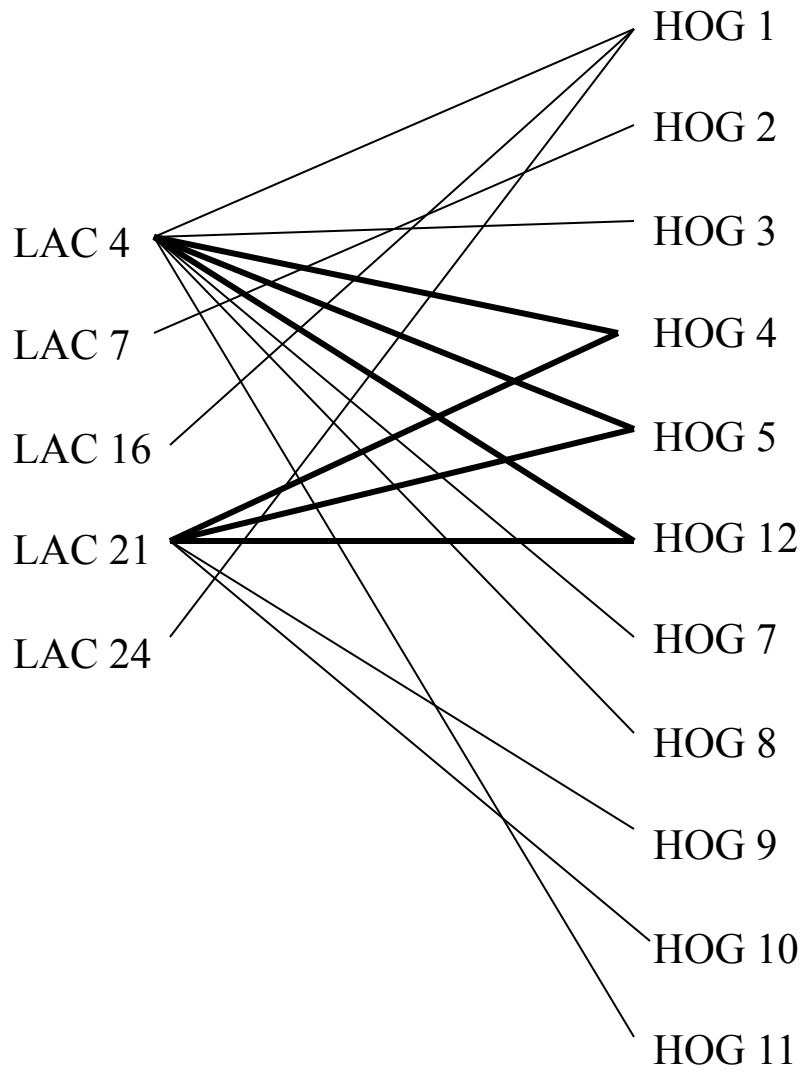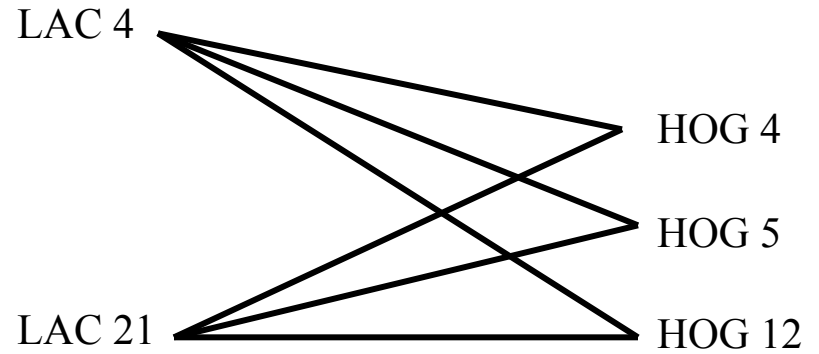

*LAC1 v. TOR1*

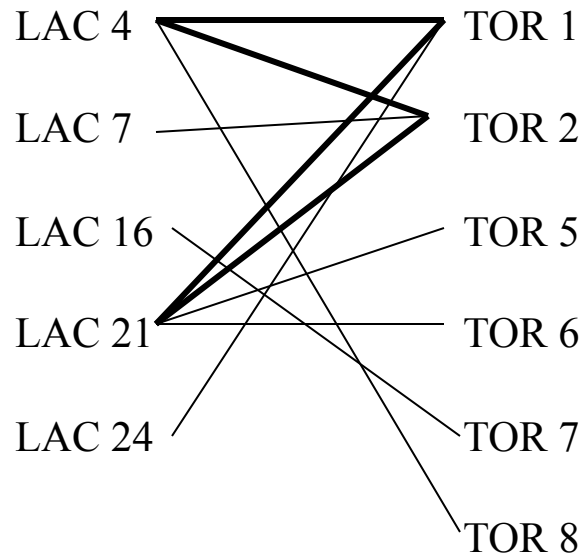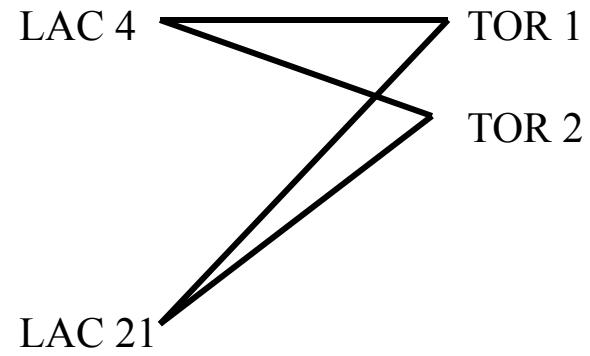

*LAC1 v. CRG1*

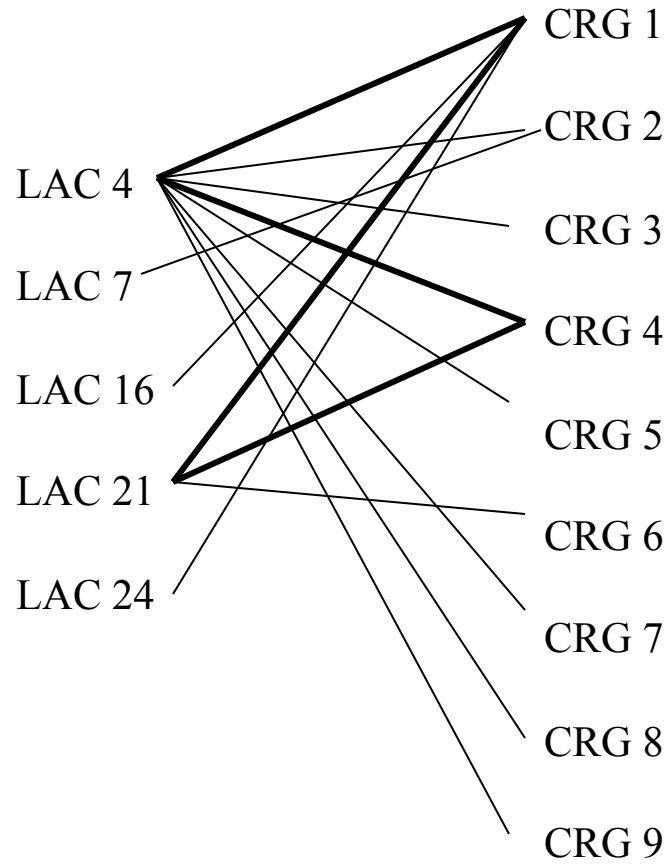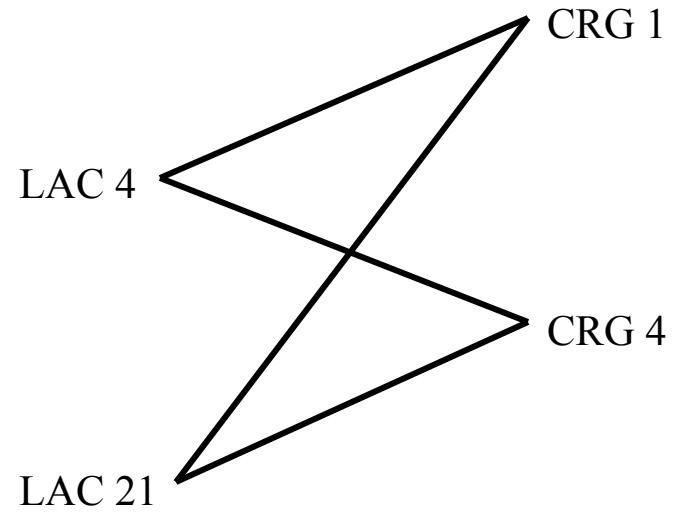

*LAC1 v. FHB1*

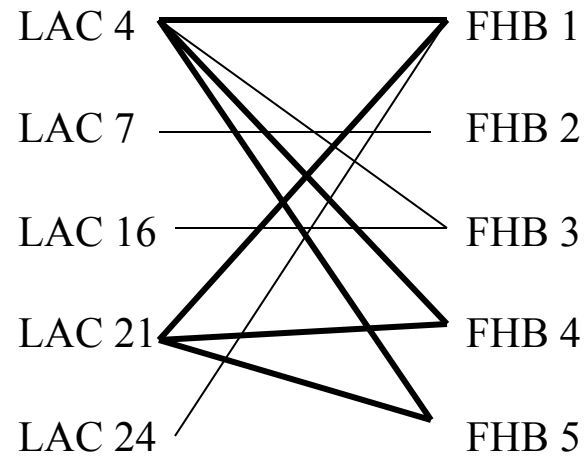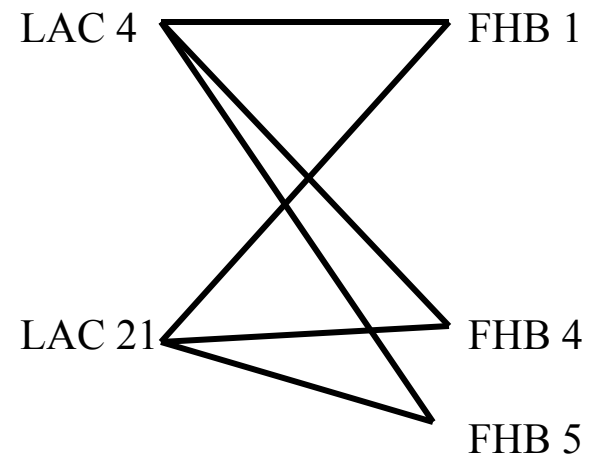

*LAC1 v. FTR1*

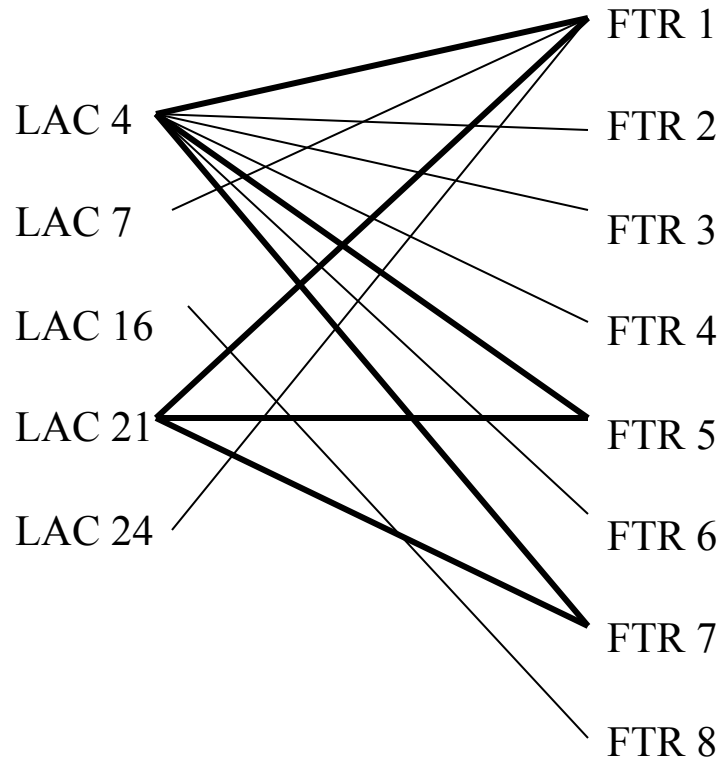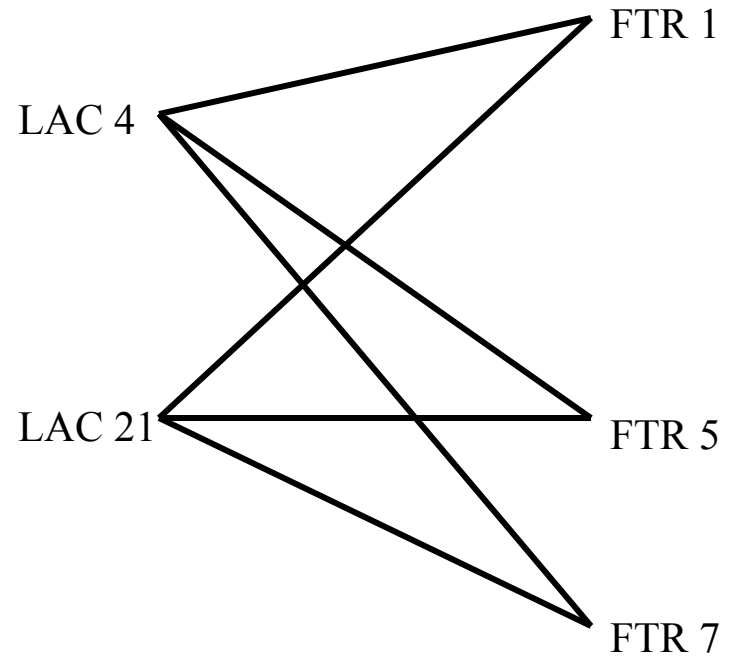



*LAC1 v. CAP59*

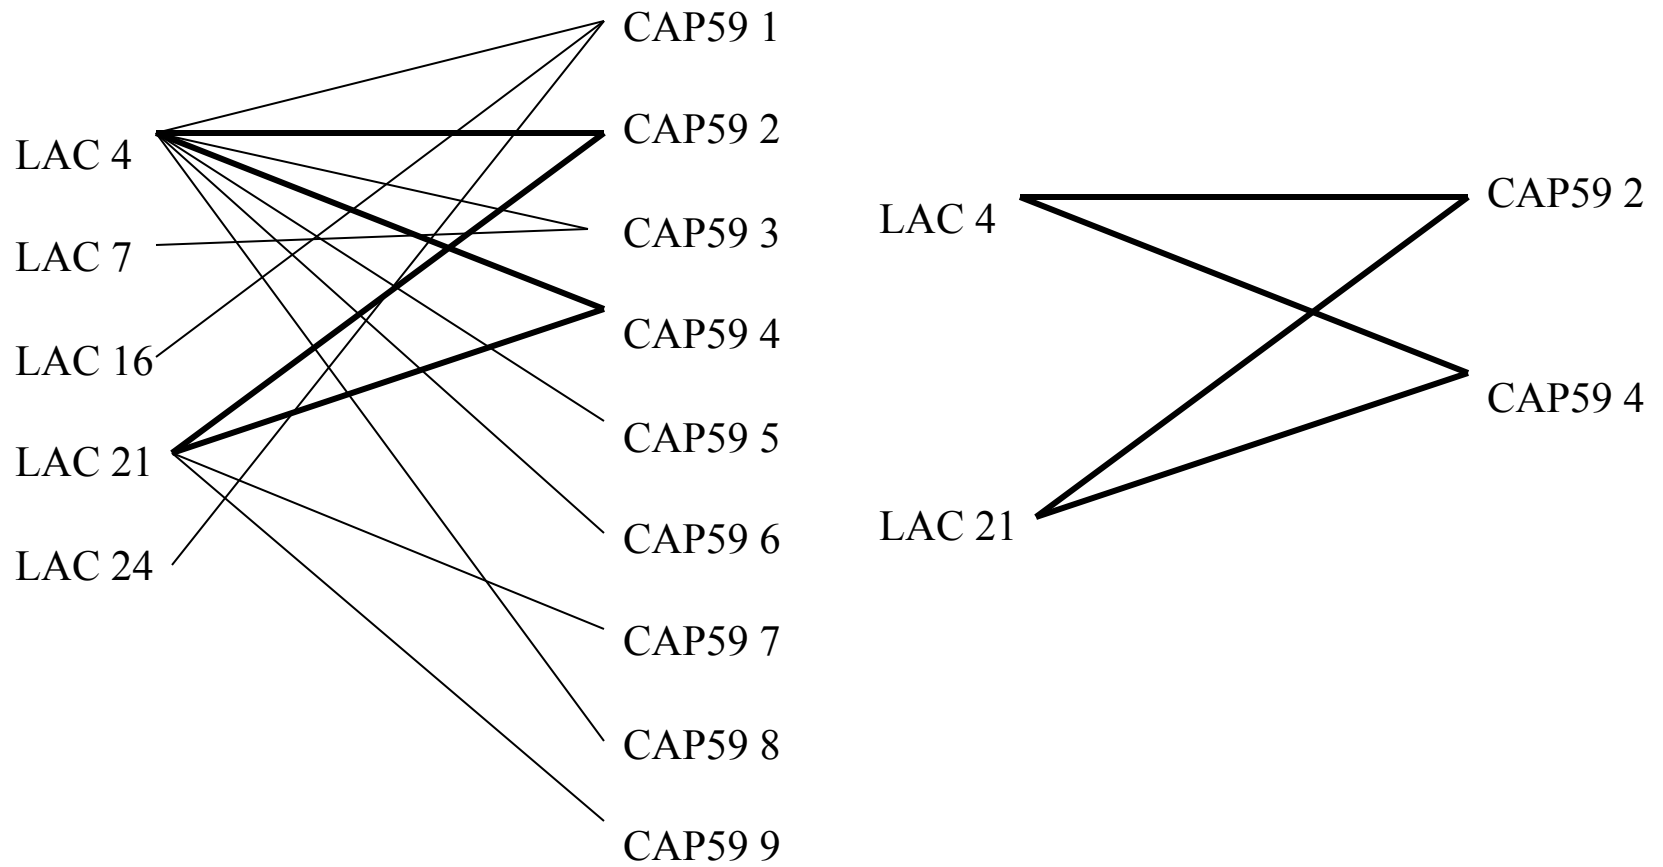

*CAP10 v. PLB1*

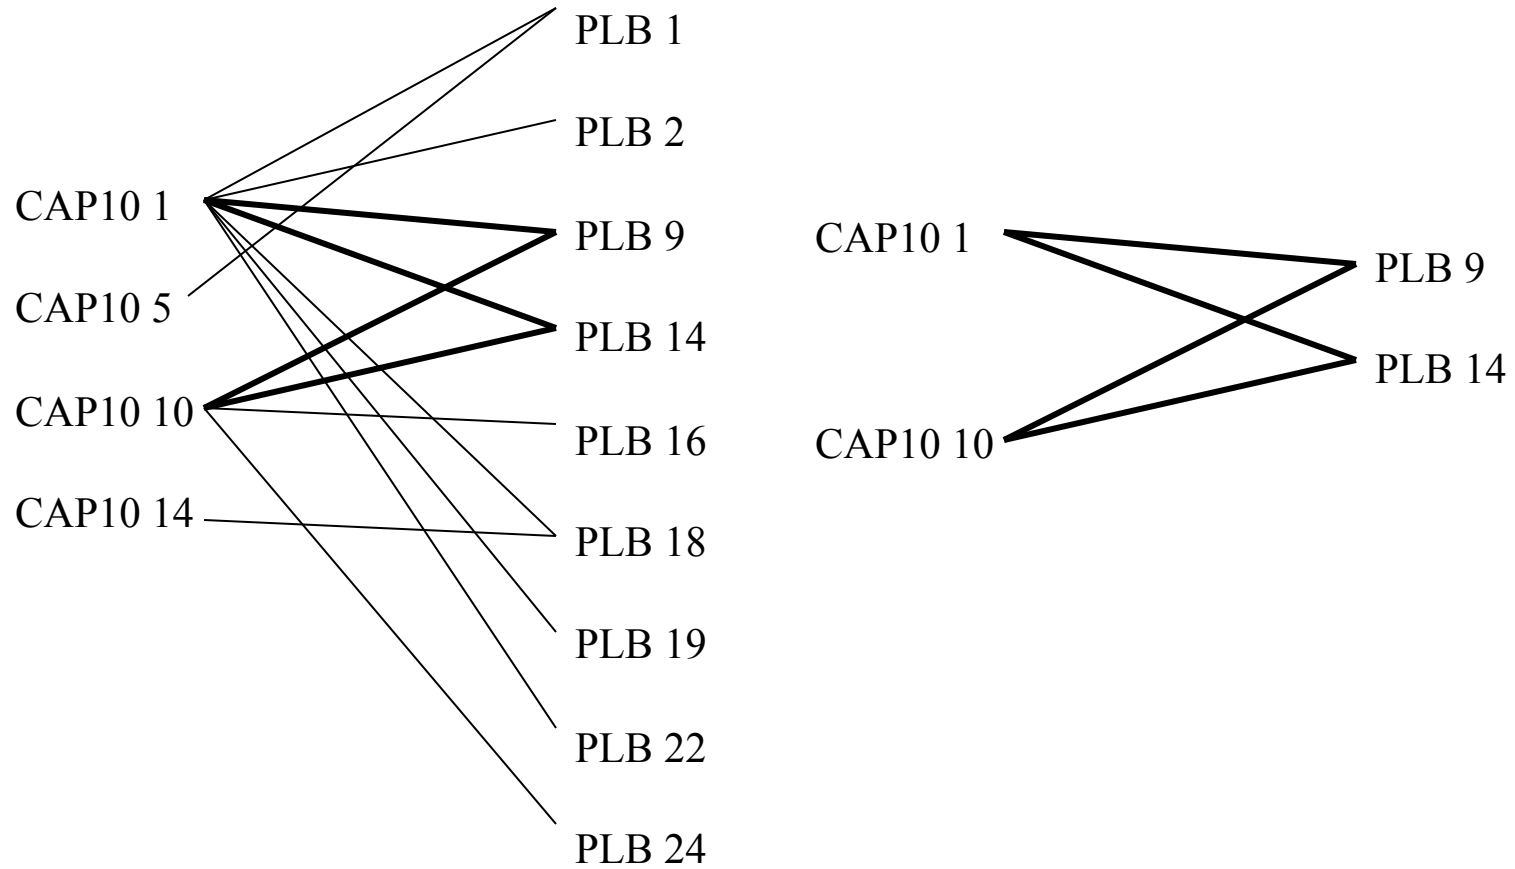

*CAP10 v. HOG1*

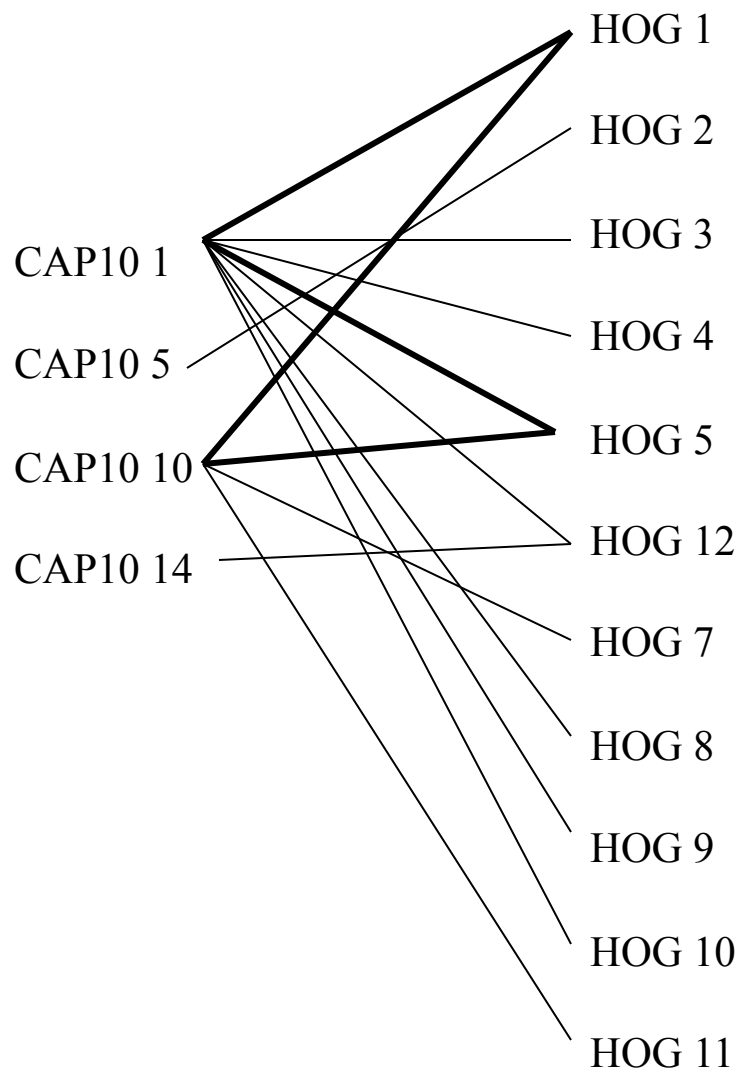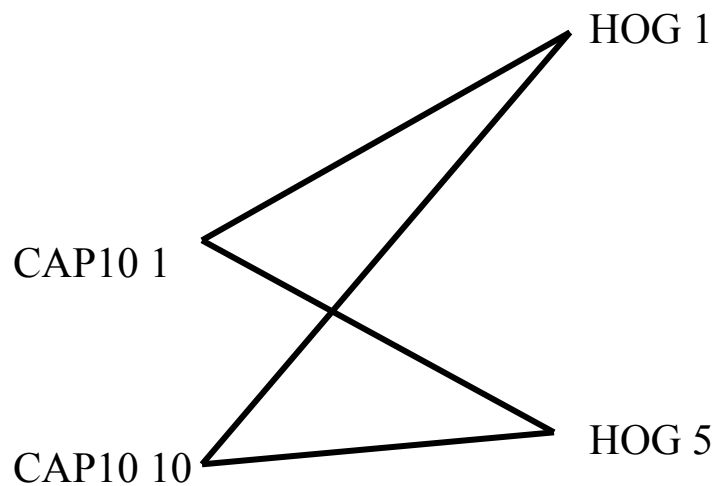

*CAP10 v. CNB1*

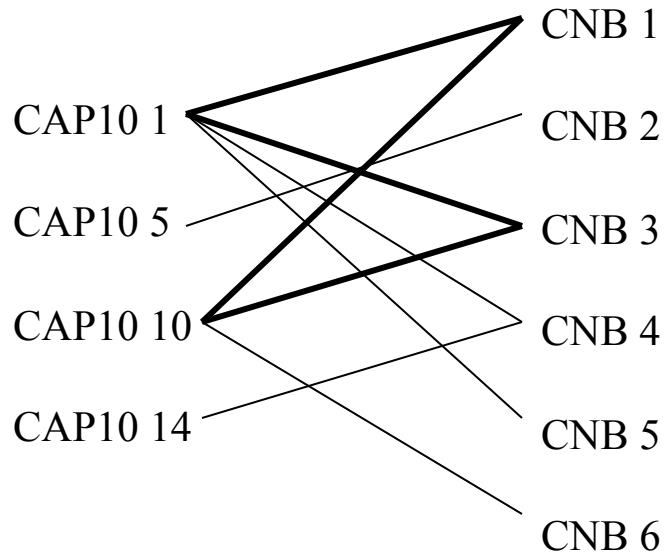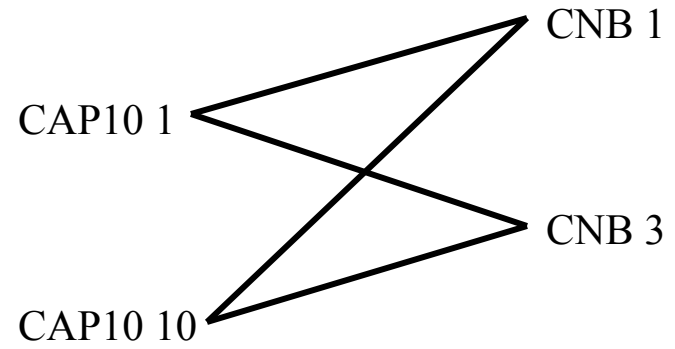

*PLB1 v. CNB1*

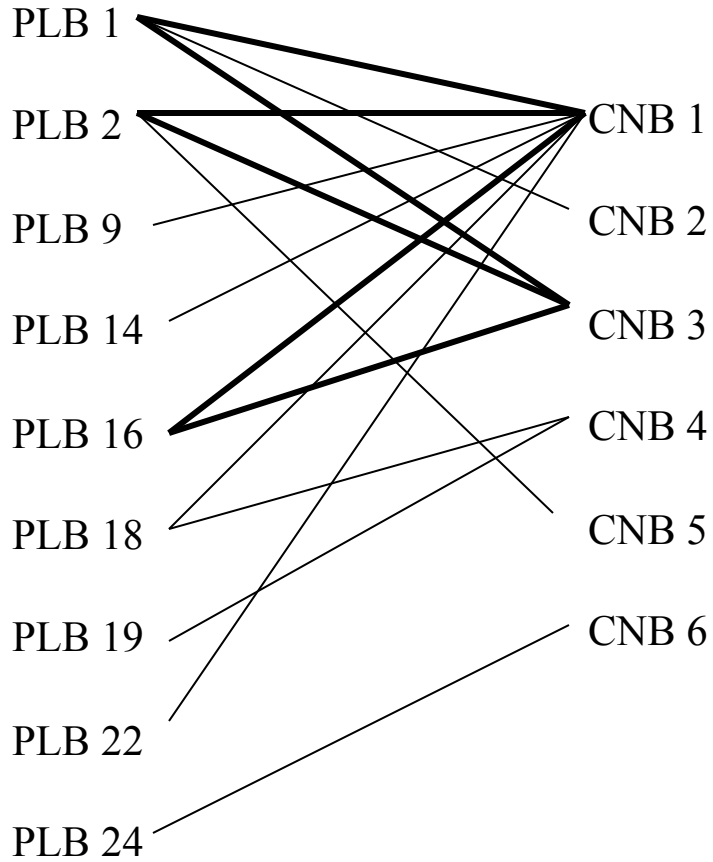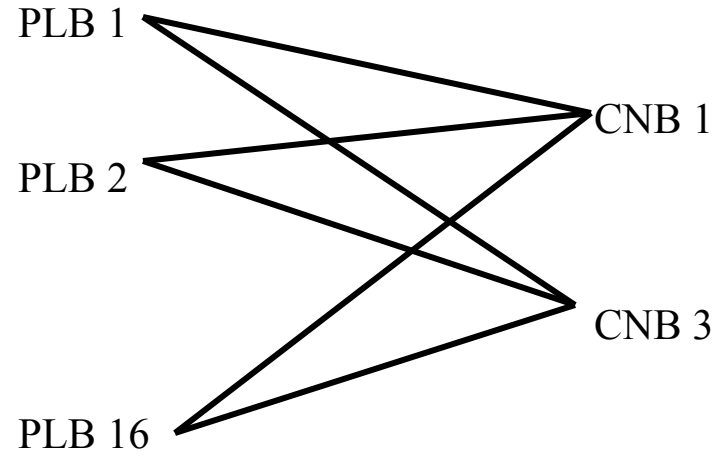

*PLB1 v. TOR1*

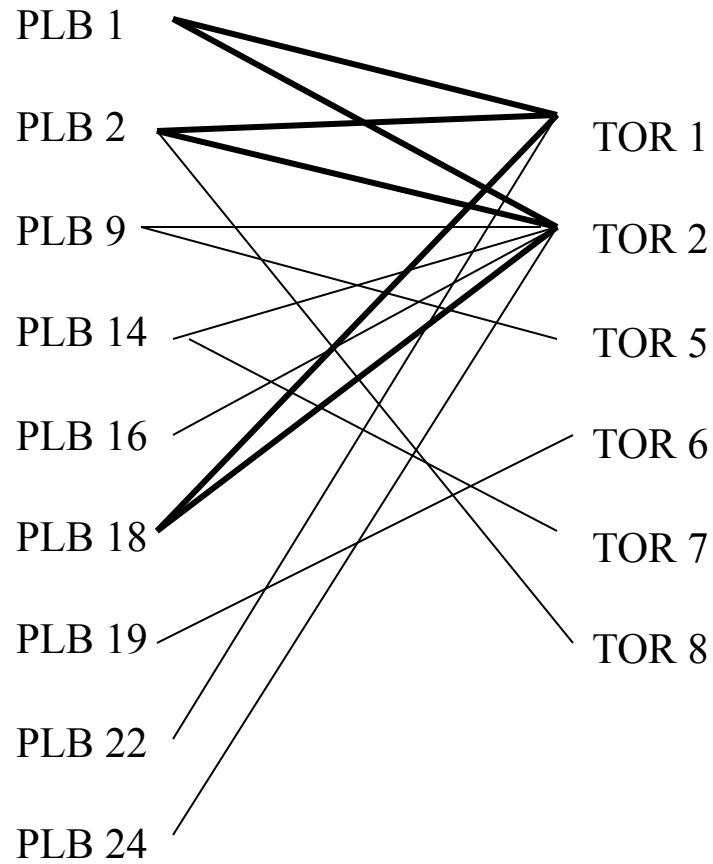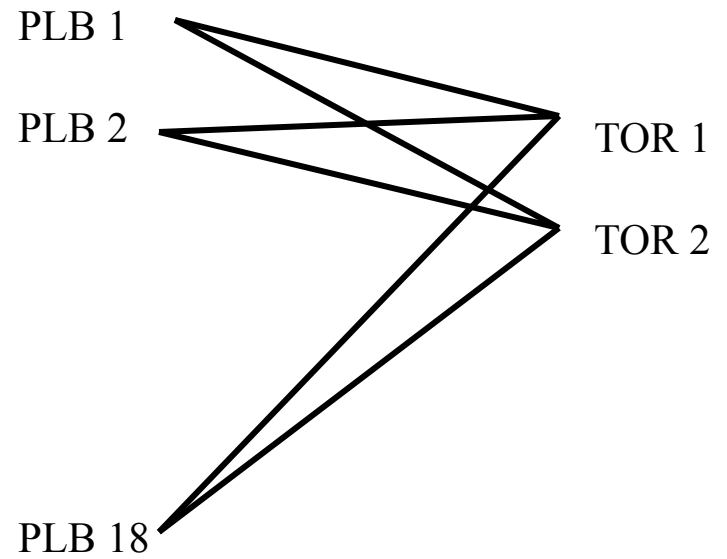

*PLB1 v. FHB1*

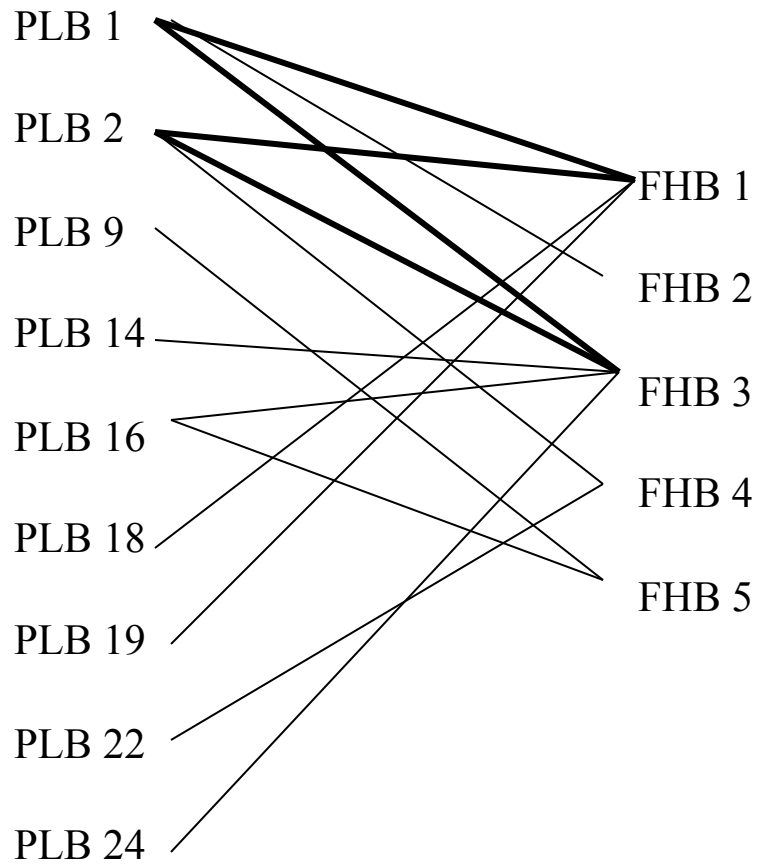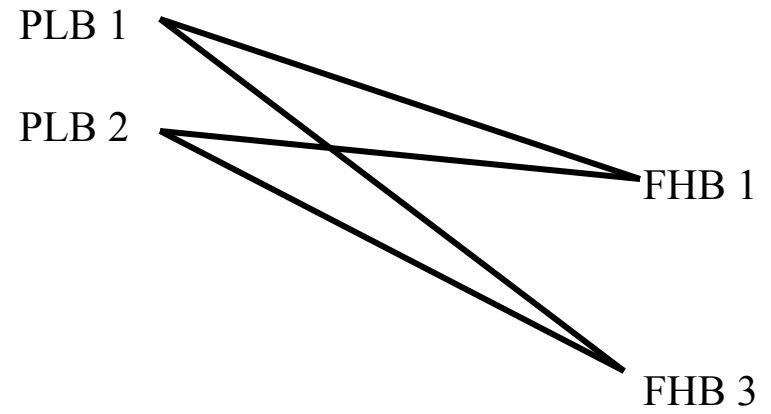

*PLB1 v. FTR1*

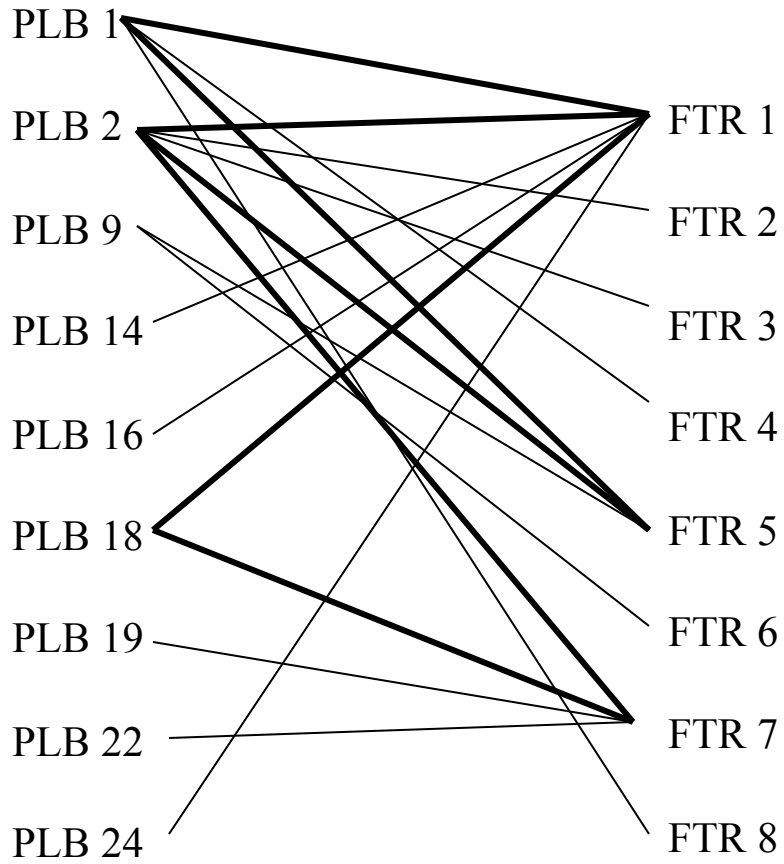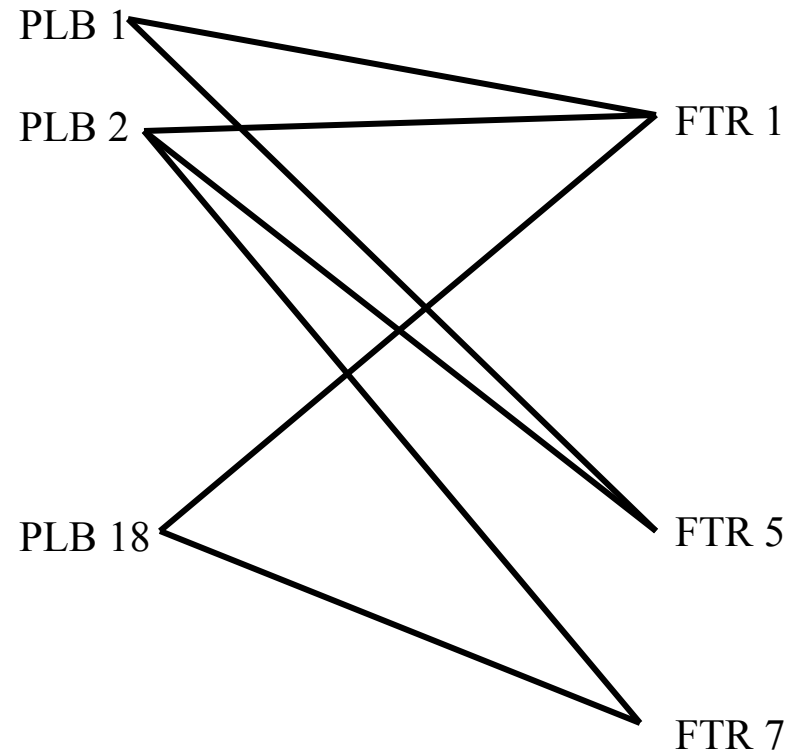



*PLB1 v. CAP59*

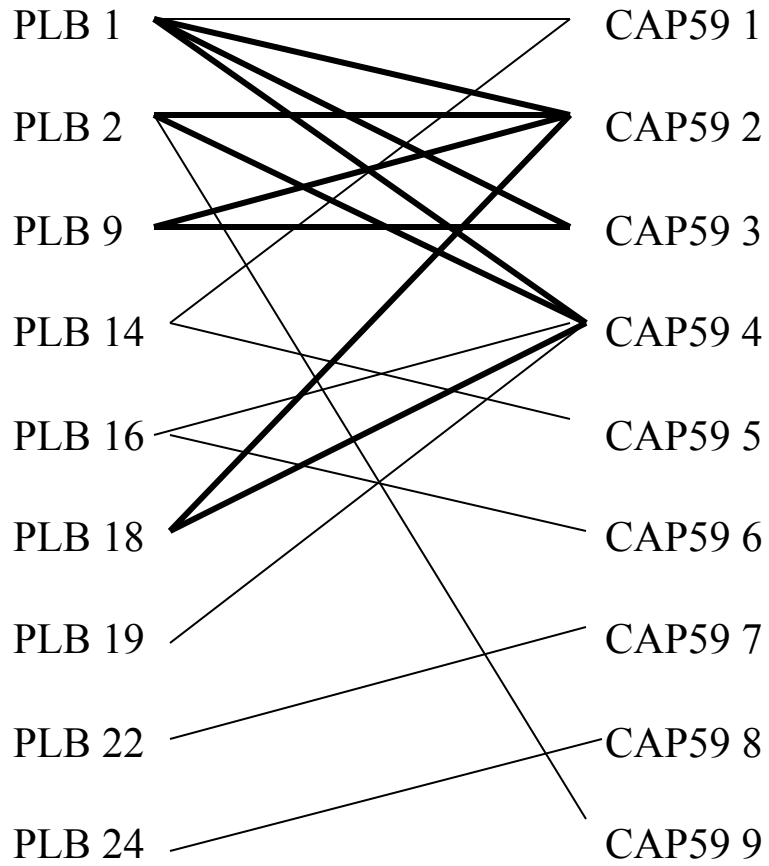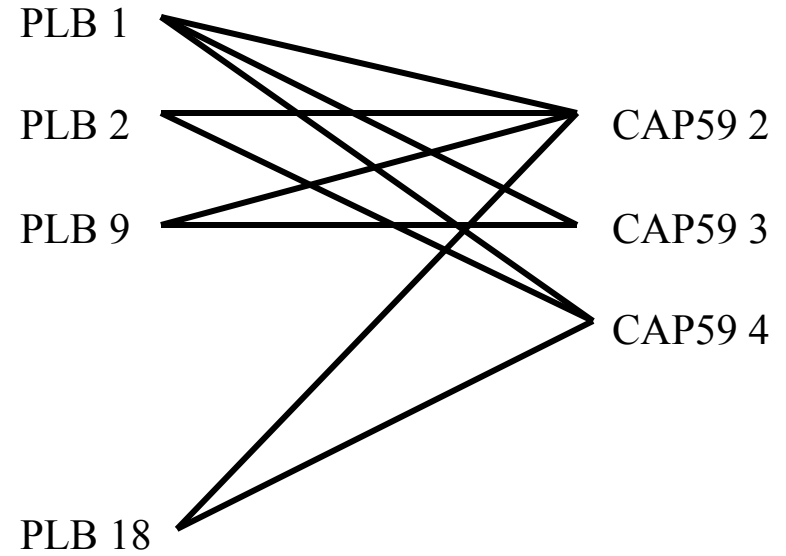

*HOG1 v. TOR1*

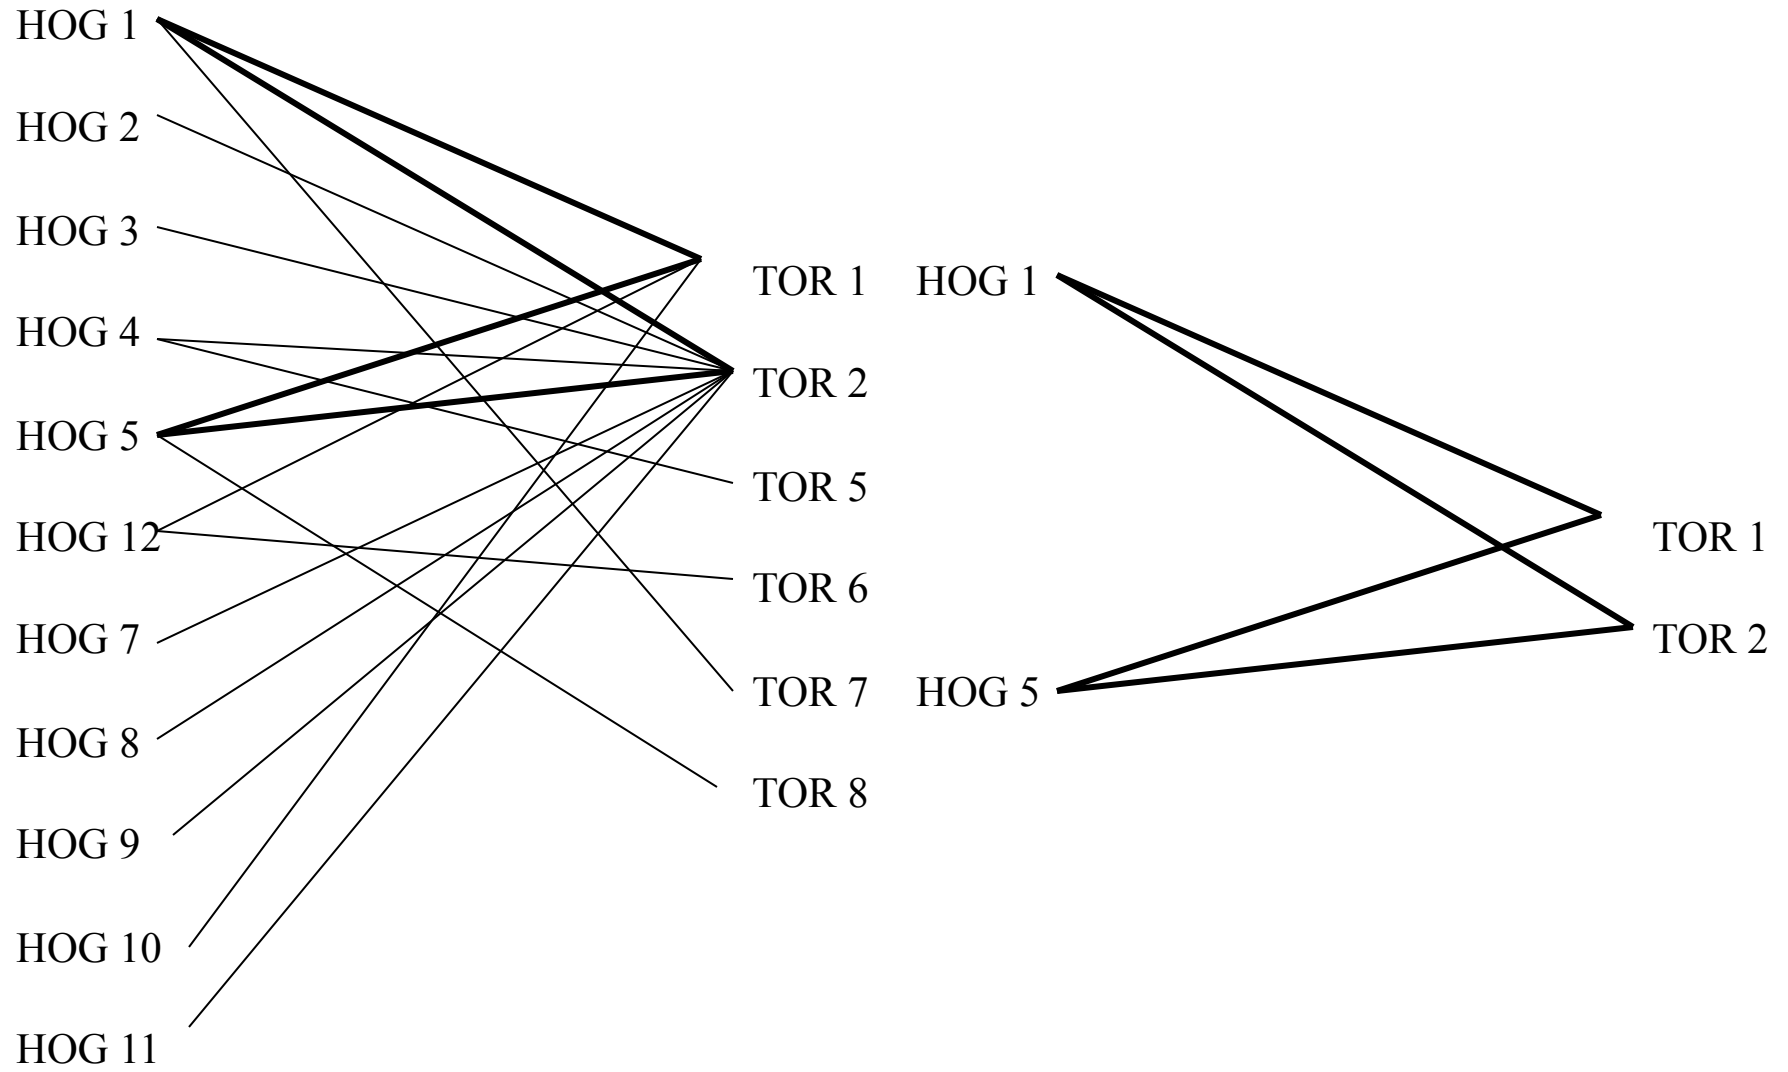

*HOG1 v. FHB1*

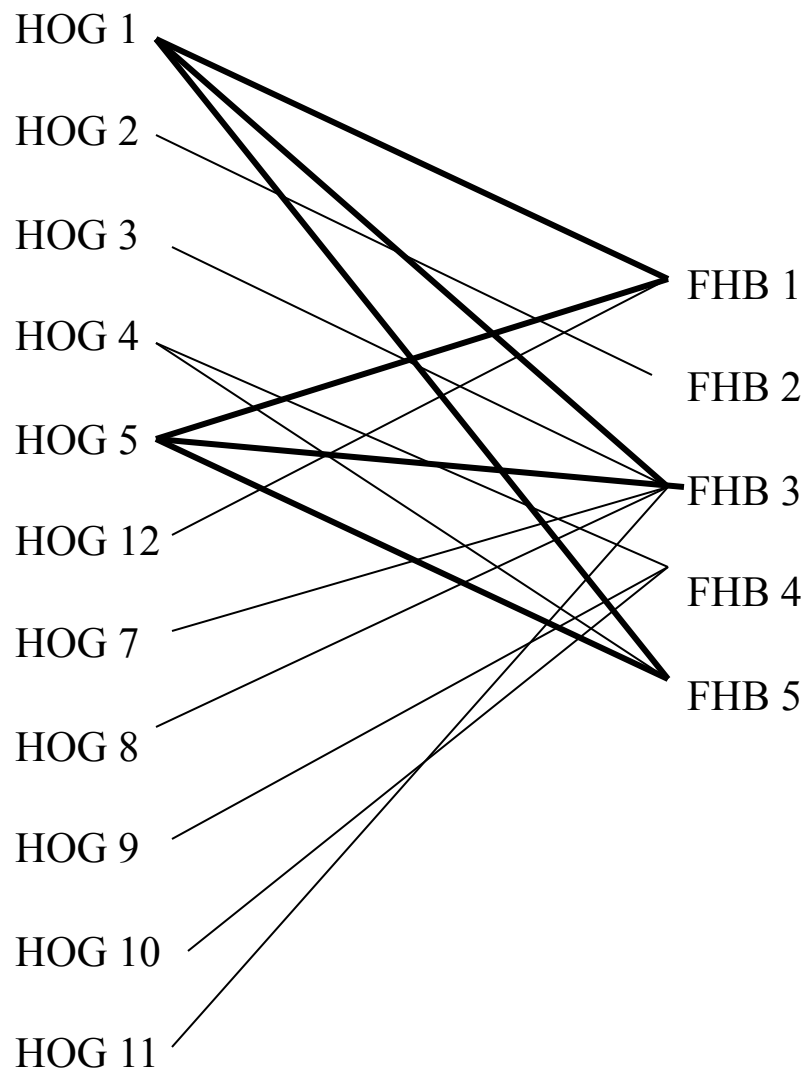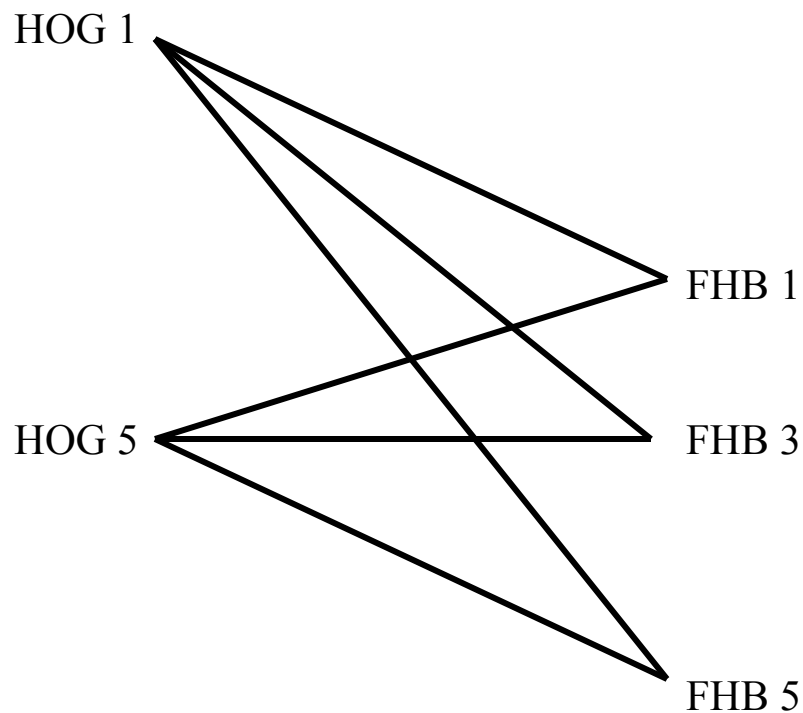

*CNB1 v. FTR1*

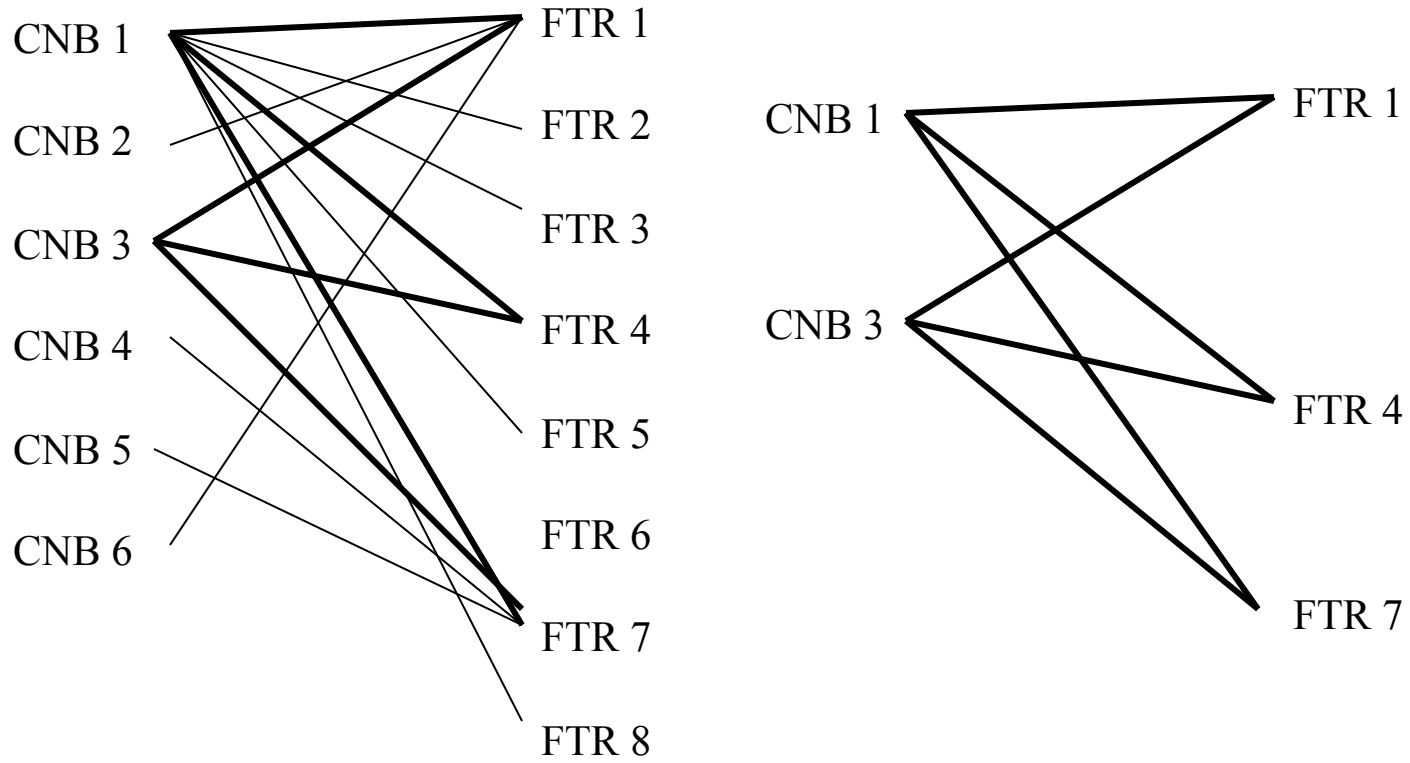

*TOR1 v. FHB1*

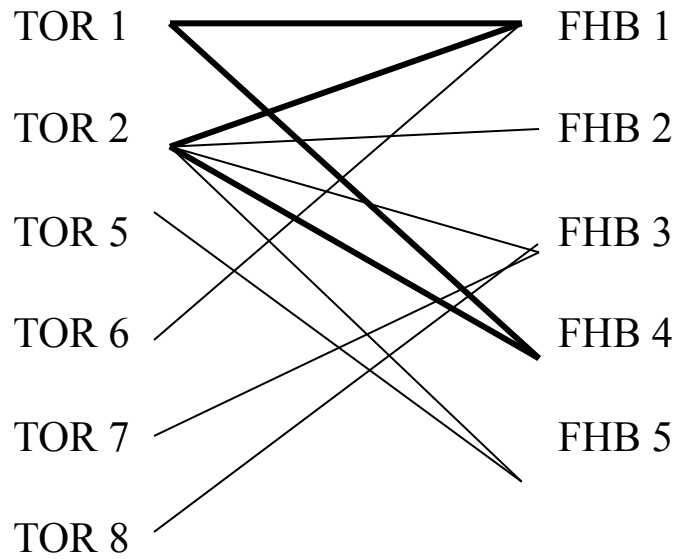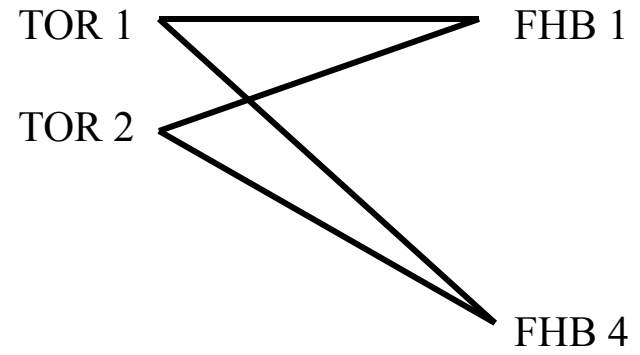

*TOR1 v. CAP59*

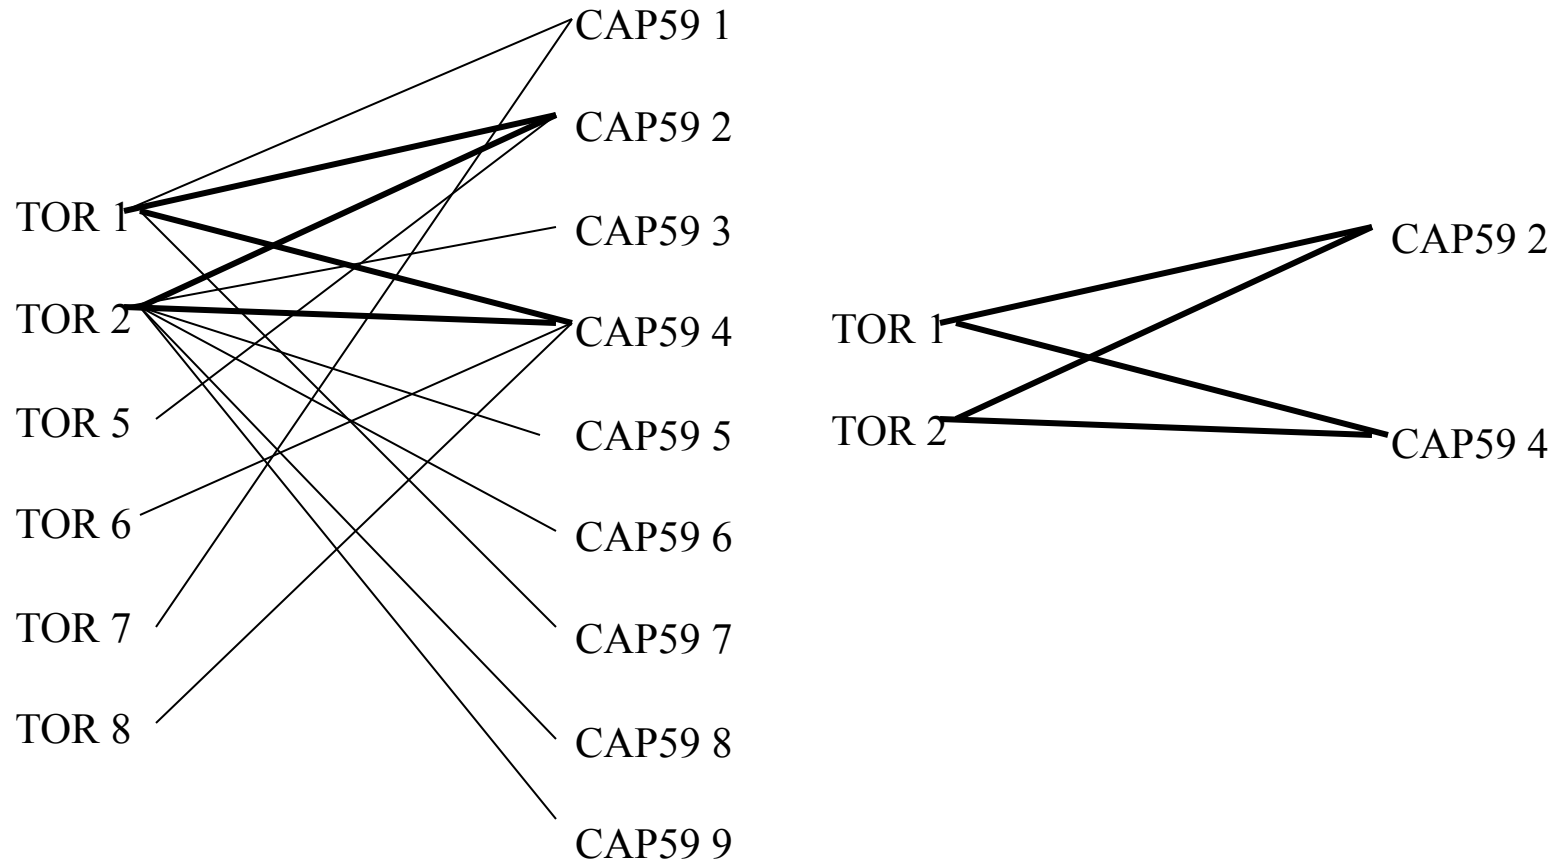

*CRG1 v. FTR1*

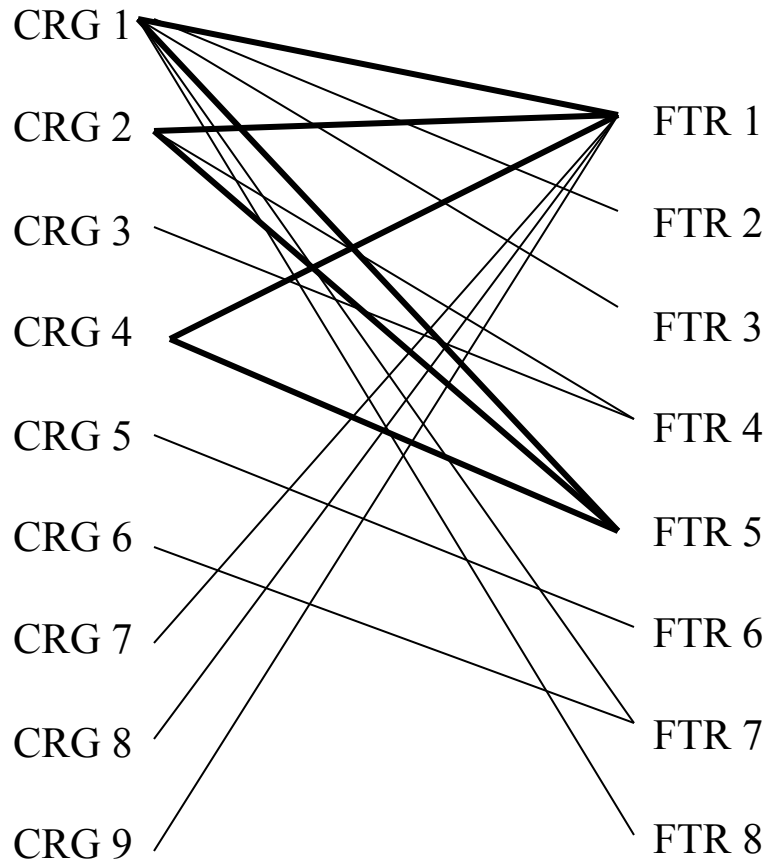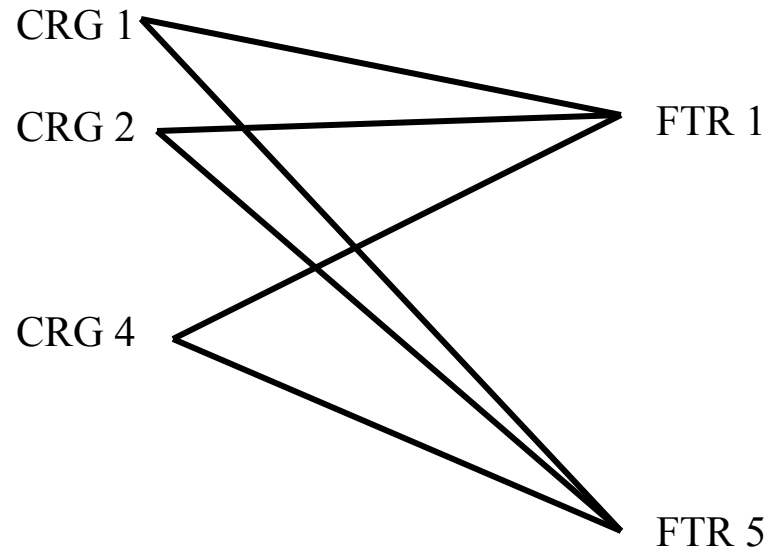

*FHB1 v. CAP59*

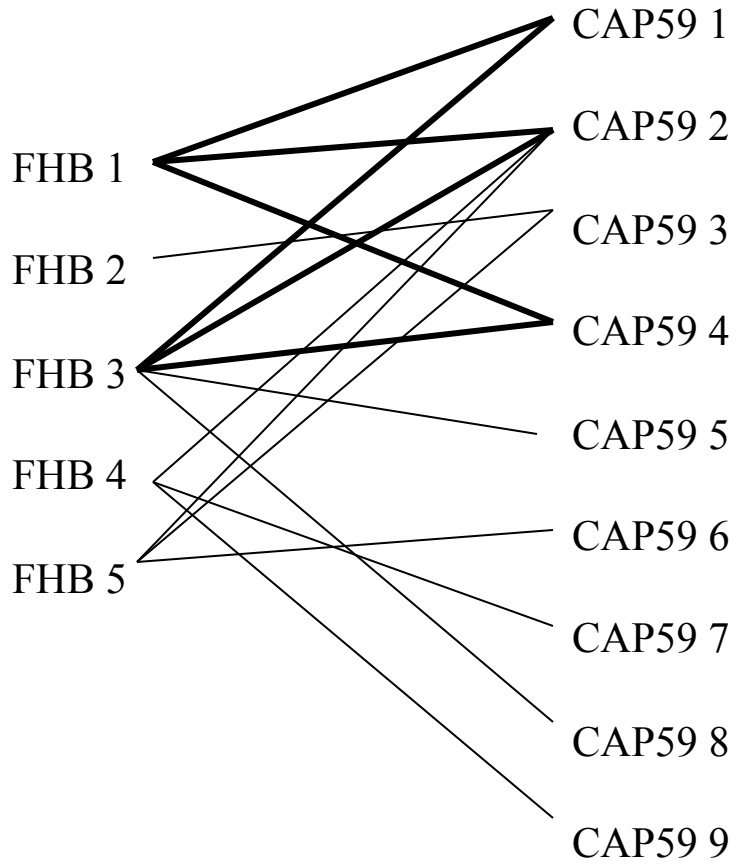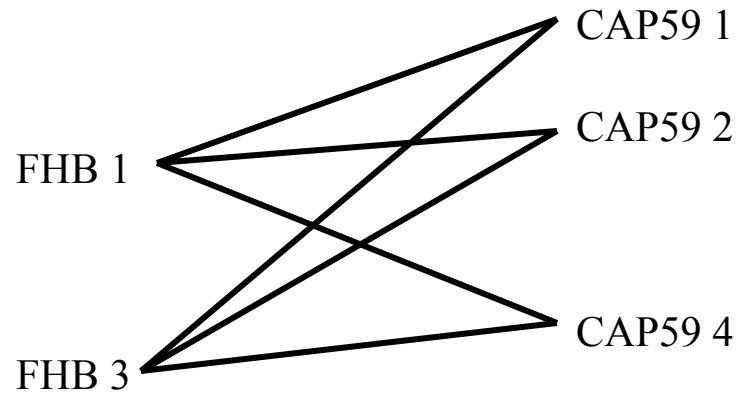



*FTR1 v. CAP59*

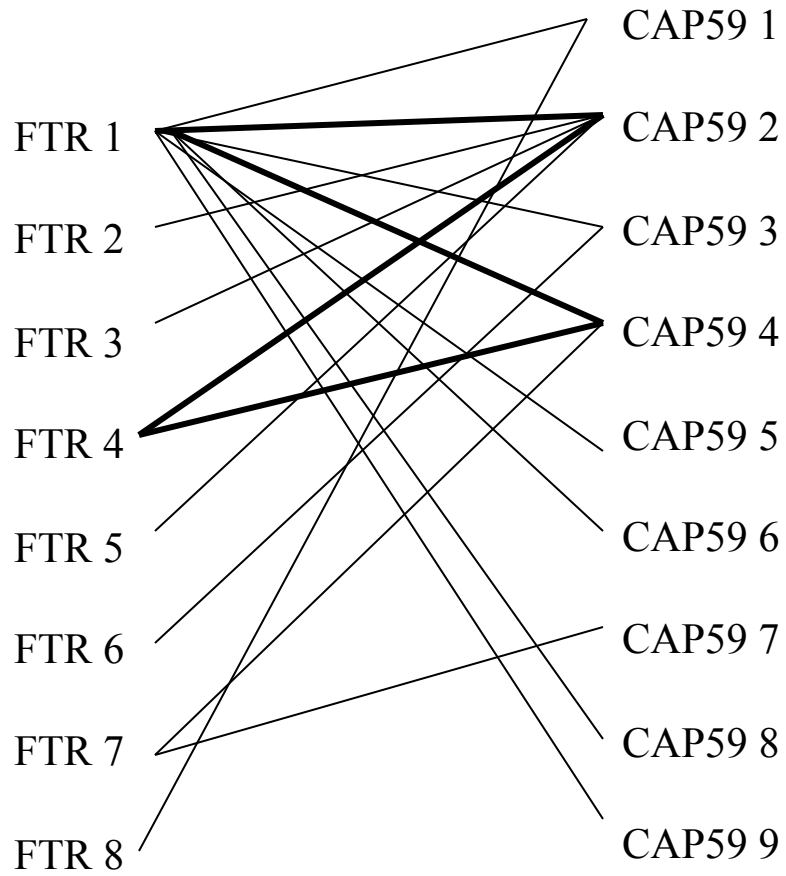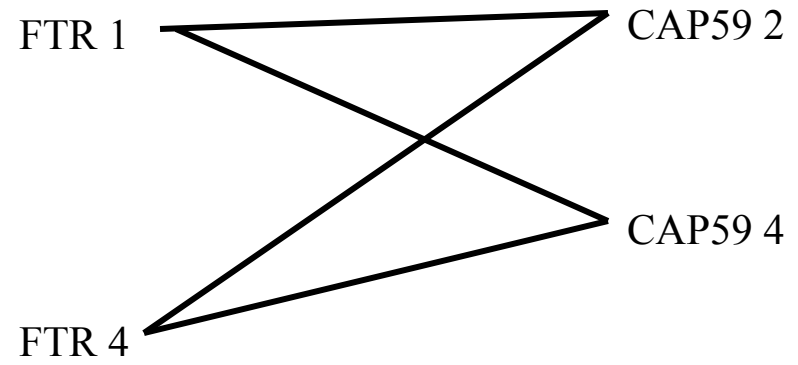

|           |    |   |    |    |    |    |    |    |   |
|-----------|----|---|----|----|----|----|----|----|---|
| ICB184    | 23 | - | 15 | 19 | 6  | 4  | 1  | 2  | 5 |
| 2004/335  | 23 | - | 22 | 7  | 6  | 4  | 1  | 2  | 5 |
| ICB183    | 23 | - | 30 | 7  | 21 | 4  | 14 | 18 | 5 |
| 93/980    | 23 | - | 27 | 5  | 22 | 21 | 1  | 19 | 5 |
| ICB182    | 23 | - | 21 | 20 | 6  | 21 | 1  | 2  | 5 |
| 97/170    | 23 | - | 28 | 5  | 21 | 21 | 1  | 2  | 5 |
| ICB179    | 28 | - | 16 | 7  | 6  | 4  | 10 | 16 | 5 |
| ICB97     | 28 | - | 25 | 7  | 24 | 4  | 10 | 24 | 5 |
| 96/1120-1 | 26 | - | 21 | 19 | 21 | 4  | 10 | 16 | 5 |
| 2003/125  | 19 | - | 26 | 7  | 25 | 21 | 1  | 9  | 5 |
| 98/1037-2 | 28 | - | 26 | 7  | 25 | 21 | 1  | 9  | 5 |
