# Supplementary material for: Emergence and Pathogenicity of Highly Virulent Cryptococcus gattii Genotypes in the Northwest United States
Source: PubMed Central journal article supplement (PMC2858702; doi:10.1371/journal.ppat.1000850), 2010-04-22
Supplement: ppat.1000850.s005.pdf [file ppat.1000850.s005.pdf]

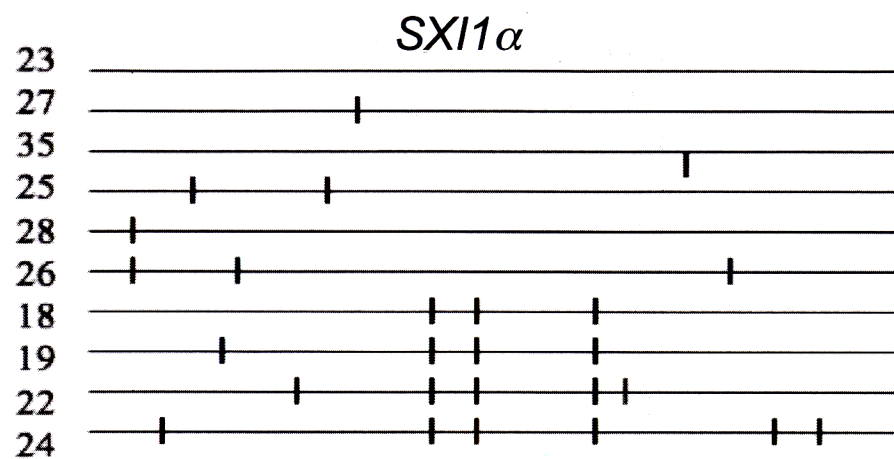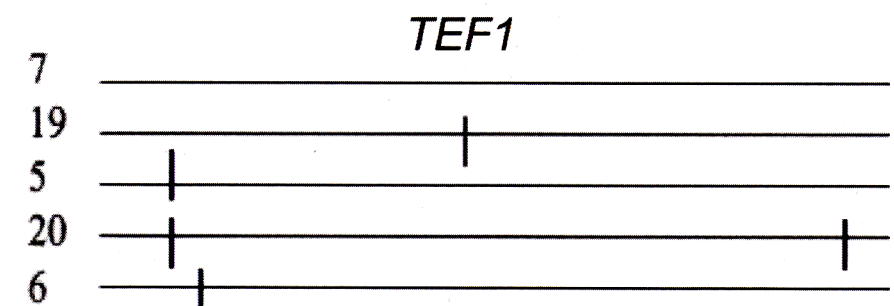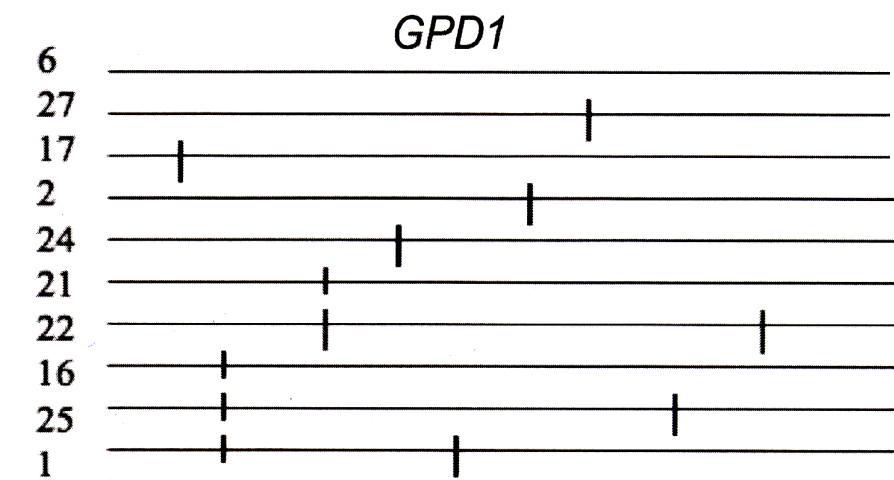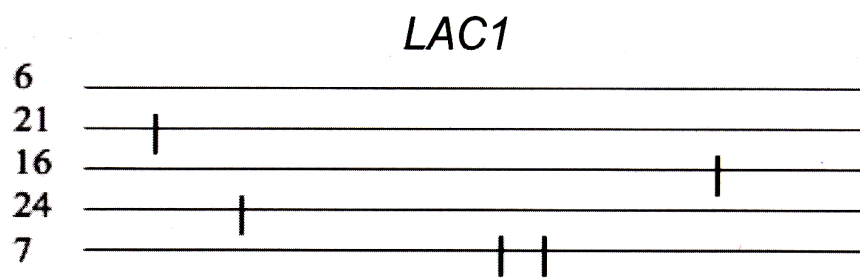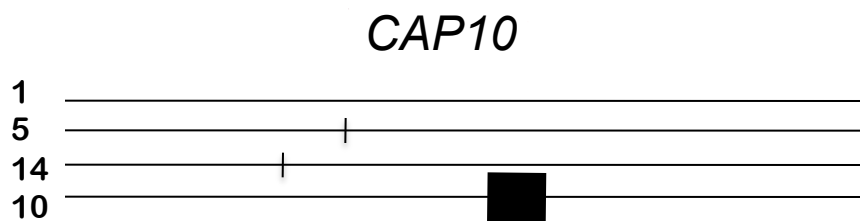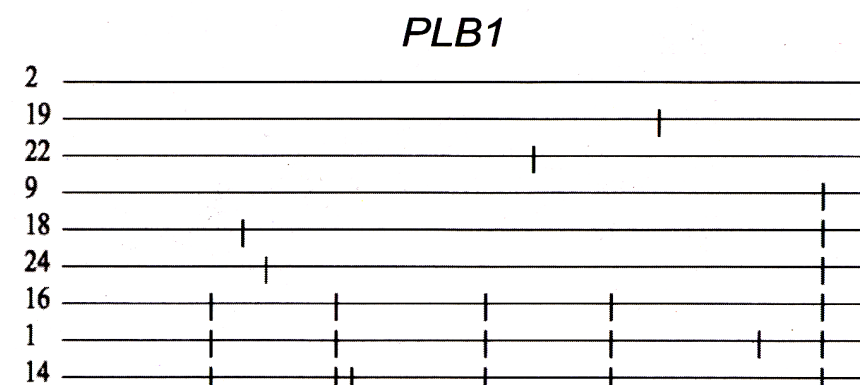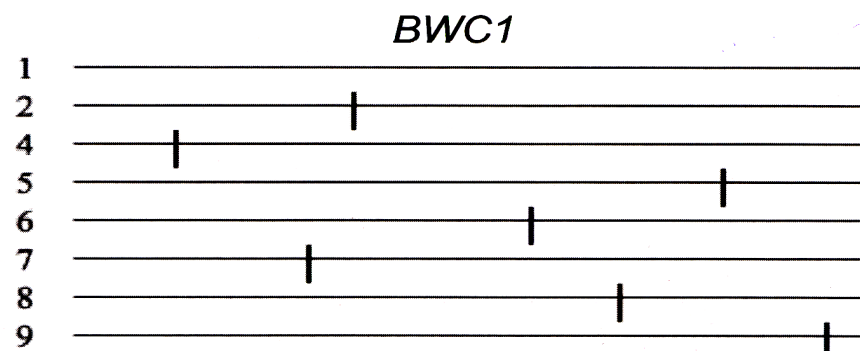

*CNB1*

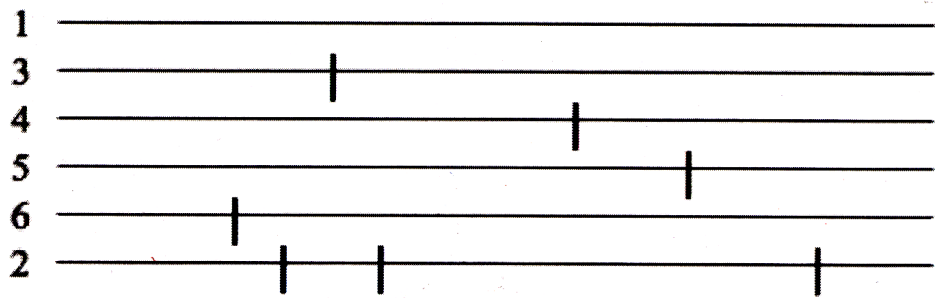

*FHB1*

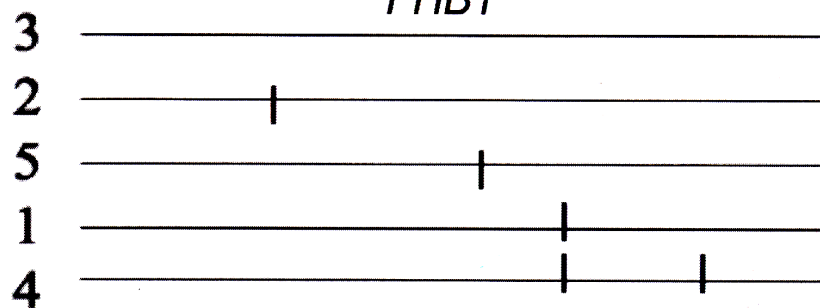

*TOR1*

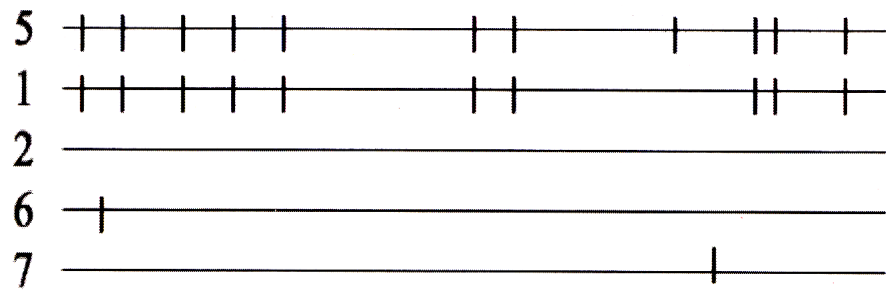

*FTR1*

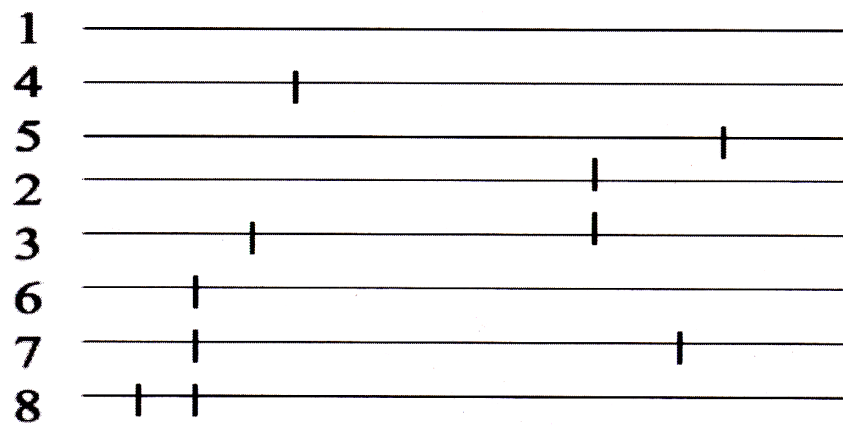

### IGS1

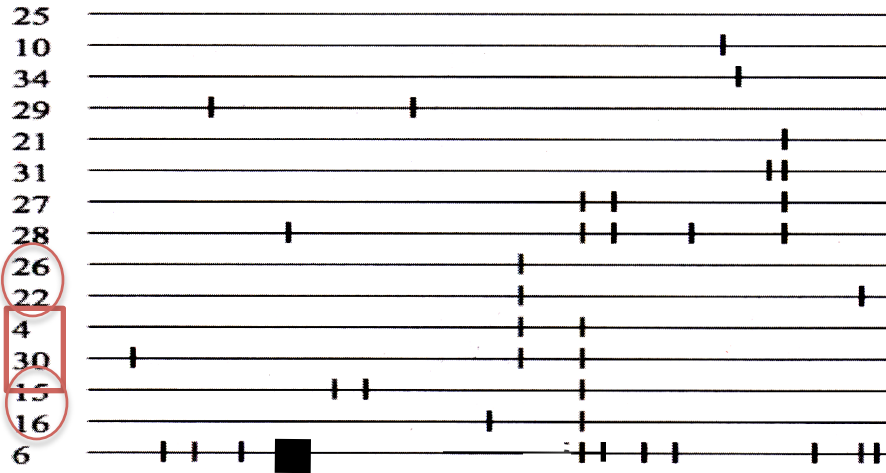

### HOG1

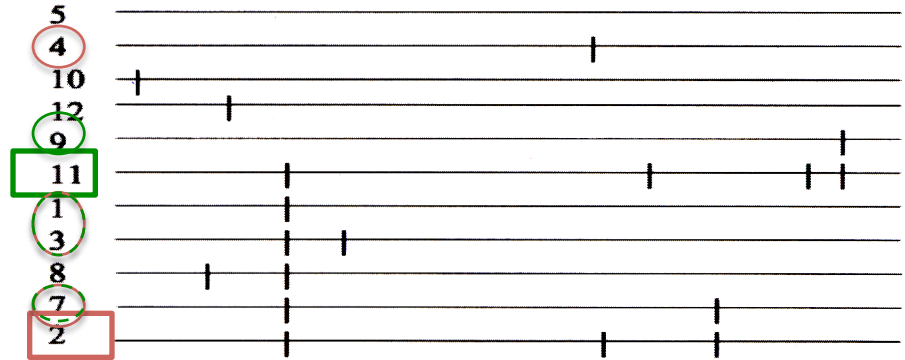

### CRG1

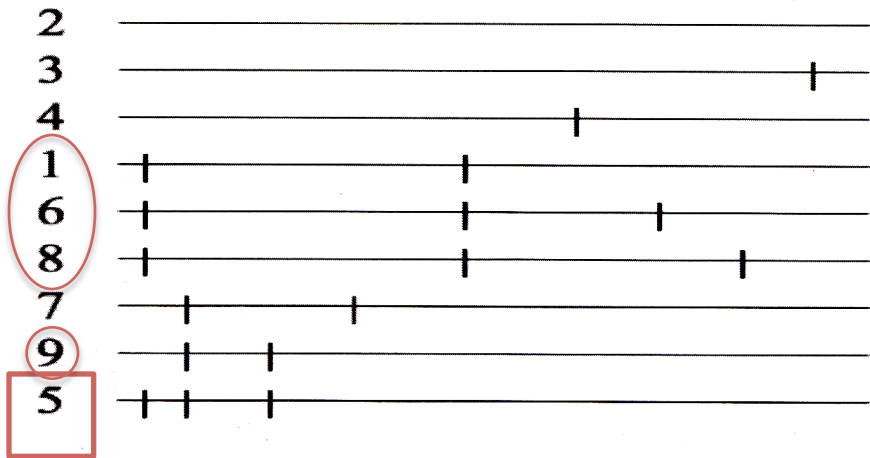

### CAP59

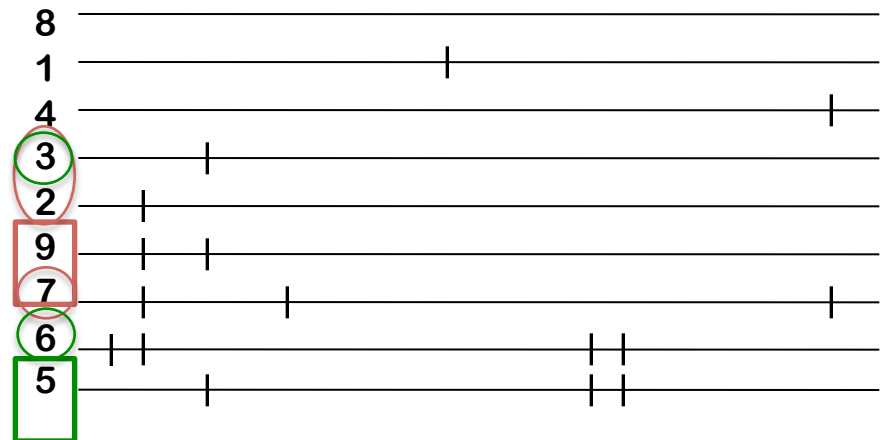

 = recombinant alleles

 = possible parents
